# Supplementary material for: Origins and Evolution of the α-L-Fucosidases: From Bacteria to Metazoans
Source: Front Microbiol. 2019 Aug 27;10:1756. doi: 10.3389/fmicb.2019.01756 (PMC6718869; doi:10.3389/fmicb.2019.01756)
Supplement: Supplementary file 3 [file Table_2.XLSX]

## Sheet: Sheet1
Protein sequences used in this study.
>tr|B2UQE4|B2UQE4_AKKM8 Coagulation factor 5/8 type domain protein OS=Akkermansia muciniphila (strain ATCC BAA-835 / Muc) OX=349741 GN=Amuc_0846 PE=4 SV=1
MNLNQLIKAAVLGGALCTACFAGAGPKGCLTPLKPVPSAEQLEWHDMEMYAFVHFTINTF
TGKEWGYGDEKPELFHPSDFDADDLVRTLADAGFKGVVLTCKHHDGFCLWPTKTTLHSVA
ASPWKQGKGDVVKEVSRACGKYGVRFGVYLSPWDRNAASYGTPDYIRMYRQQLKELATGY
GSIFLAWFDGANGGDGYYGGARERRSIDRSAYYDWKATWGELKKRQPGAVIFSDVGPDVR
WVGNESGYAGYPCWATYTPVPLQAGTEPAPGTVRYRLGTEGTMDGKYWIPAEVDVSIRPG
WFWHEHENSRVRTPENLLKLYFDSVGRGANLNLNVPPDRRGRIHEEDKKSLAGFRVLLDE
LYSRNFASGAQAESSSSWKGHGAEQVLDRKRTTYWVAAPEDKHPCVVLKLPEPAAFDVIR
LAEPIQLGQRVRKFRVEVRENGQWSKWTEGASIGARVLLKGRPVTADGVRVVLEQSRAVP
ALCEVSLWKYPVILNAPAVNYDRNGRVTLASAENVVIRYTTDGTEPGPQSAMYRNPFFLP
AGGTVKAAAEYRGRKSSVTTQIIPVPTRDWKVVAGERSAAAPELAIDGDSSTLWHTHAAQ
GELAPPQALEIDMGRPVNVAAVIYTPRRDSSTGTVDRYAVYLSMDGNTWGAPAAEGEFSN
IRANPVPQRIDLKAPVKARYLRFVGKRVVEGSHVAVAELGVLGK
>tr|A0A2N8HYB2|A0A2N8HYB2_9BACT Uncharacterized protein OS=Akkermansia muciniphila OX=239935 GN=CXU09_10795 PE=4 SV=1
MNLNQLIKAAVLGGALCTACFAGAGPKGCLTPLKPVPSAEQLEWHDMEMYAFIHFTINTF
TGKEWGYGDEKPELFHPSDFNADDLVRTLADAGFKGVVLTCKHHDGFCLWPTKTTRHSVA
ASPWKQGKGDVVKEVSRACGKYGVRFGVYLSPWDRNAASYGTPDYIRMYRRQLKELATGY
GPIFLAWFDGANGGDGYYGGAREKRSIDRSTYYDWKTTWGELKKRQPGAVIFSDVGPDAR
WVGNESGYAGYPCWATYTPVPLQAGTEPAPGAVRYRLGTEGTMDGKYWIPAEVDVSIRPG
WFWHEHENSRVRTPENLLKLYFDSVGRGANLNLNVPPDRRGRIHEEDKKSLAGFRVLLDE
LYSRNFASGAQVESSSSRKGHGAEQVLDRKRTTYWVAAPEDKHPCVVLKLPKPAAFDVIR
LAEPIQLGQRVRKFRVEVRENGQWSRWAEGVSIGARVLLKGRPVTADGVRVVLEQSRAVP
ALCEVSLWKYPVILNAPAVSYDRNGRVTLASAENVVIRYTTDGTEPGPQSAVYRNPFLLP
AGGTVKAAAEYRGRKSSVTTQLIPVPTRDWKVVSGERSAAAPELAIDGDSSTLWHTHAAQ
GELAPPQALEIDMGRPVNVASVIYTPRRDSATGTIDRYAVYLSADGNTWGAPAAEGEFSN
IRANPVPQRIDLKAPVKARYLRFVGKRVVEGSHVAVAELGVLEK
>tr|A0A2N8IIG9|A0A2N8IIG9_9BACT Uncharacterized protein OS=Akkermansia muciniphila OX=239935 GN=C1O50_04925 PE=4 SV=1
MNLNQLIKAAVLGGALCTACFAGAGPEGCLTPLKPVPSAEQLEWHDMEMYAFVHFTINTF
TGKEWGYGDEKPELFHPSDFNADDLVRTLADAGFKGVVLTCKHHDGFCLWPTKTTLHSVA
ASPWKQGKGDVVKEVSRACGKYGVRFGVYLSPWDRNAASYGTPDYIRMYRQQLKELATGY
GPIFLAWFDGANGGDGYYGGAREKRSIDRSAYYDWKATWDELKKRQSGAVIFSDVGPDVR
WVGNESGYAGYPCWATYTPVPLQAGTEPAPGTVRYRLGTEGTMDGKYWIPAEVDVSIRPG
WFWHEHENSRVRTPENLLKLYFDSVGRGANLNLNVPPDRRGRIHEEDKKSLAGFRVLLDE
LYSRNFASGAQAESSSSWKGHGAEQVLDRKRTTYWVAAPEDKHPCVVLKLPEPAAFDVIR
LAEPIQLGQRVRKFRVEVRENGQWSKWTEGASIGARVLLKGRPVTADGVRVVLEQSRAVP
ALCEVSLWKYPVILNAPAVNYDRNGRVTLASAENVVIRYTTDGTEPGPQSAMYRNPFFLP
AGGTVKAAAEYRGRKSSVTTQIIPVPTRDWKVVAGERSAAAPELAIDGDSSTLWHTHAAQ
GELAPPQALEIDMGRPVNVAAVIYTPRRDSATGTVDRYAVYLSMDGNTWGAPAAEGEFSN
IRANPVPQRIDLKAPVKARYLRFVGKRVVEGSHVAVAELGVLEK
>tr|A0A2N8IPW0|A0A2N8IPW0_9BACT Uncharacterized protein OS=Akkermansia muciniphila OX=239935 GN=CXT92_10880 PE=4 SV=1
MNLNQLIKAAVLGGALCTACFAGAGPKGCLTPLKPVPSAEQLEWHDMEMYAFVHFTINTF
TGKEWGYGDEKPELFHPSDFDADDLVRTLADAGFKGVVLTCKHHDGFCLWPTKTTLHSVA
ASPWKQGKGDVVKEVSRACGKYGVRFGVYLSPWDRNAASYGTPDYIRMYRQQLKELATGY
GSIFLAWFDGANGGDGYYGGARERRSIDRSAYYDWKATWGELKKRQPGAVIFSDVGPDVR
WVGNESGYAGYPCWATYTPVPLQAGTEPAPGTVRYRLGTEGTMDGKYWIPAEVDVSIRPG
WFWHEHENYRVRTPENLLKLYFDSVGRGANLNLNVPPDRRGRIHEEDKKSLAGFRVLLDE
LYSRNFASGAQAESSSSWKGHGAEQVLDRKRTTYWVAAPEDKHPCVVLKLPEPAAFDVIR
LAEPIQLGQRVRKFRVEVRENGQWSKWTEGASIGARVLLKGRPVTADGVRVVLEQSRAVP
ALCEVSLWKYPVILNAPAVNYDRNGRVTLASAENVVIRYTTDGTEPGPQSAMYRNPFFLP
AGGTVKAAAEYRGRKSSVTTQIIPVPTRDWKVVAGERSAAAPELAIDGDSSTLWHTHAAQ
GELAPPQALEIDMGRPVNVAAVIYTPRRDSATGTVDRYAVYLSMDGNTWGAPAAEGEFSN
IRANPVPQRIDLKAPVKARYLRFVGKRVVEGSHVAVAELGVLGK
>tr|A0A3R5UVD2|A0A3R5UVD2_9BACT Uncharacterized protein OS=Akkermansia muciniphila OX=239935 GN=C1I94_05165 PE=4 SV=1
MNLNQLITAAVLGGALCATCFAEARPEDVLTPLTPVPSAAQLEWHDMEMYAFIHFTINTF
TGKEWGYGDEKPELFHPSDFNADDLVRTLADAGFKGVVLTCKHHDGFCLWPTKTTRHSVA
ASPWKQGKGDVVKEVSRACGEYGVRFGVYLSPWDRNAASYGTPDYIRMYRRQLKELAAGY
GPIFLAWFDGANGGDGYYGGAREKRSIDHSTYYDWKTTWGELKKRQPGAVIFSDVGPDAR
WVGNESGYAGYPCWATYTPVPLQAGTEPAPGAVRYRLGTEGTMDGKYWIPAEVDVSIRLG
WFWHEHENSRVRTPENLLKLYFDSVGRGANLNLNVPPDRRGRIHEEDKKSLAGFRVLLDE
LYSRNFASGAQVESSSSRKGHGAEQVLDRKRTTYWVAAPEDKHPCVVLKLPKPAAFDVIR
LAEPIQLGQRVRKFRVEVRENGQWSRWTEGVSIGARVLLKGRPVTADGVRVVLEQSRAVP
ALCEVSLWKYPVILNAPAVSYDRNGRVTLASAENVVIRYTTDGTEPGPQSAVYRNPFLLP
AGGTVKAAAEYRGRKSSVTTQLIPVPTRDWKVVSGERSAAAPELAIDGDSSTLWHTHAAQ
GELAPPQALEIDMGRPVNVASVIYTPRRDSATGTIDRYAVYLSADGNTWGAPAAEGEFSN
IRANPVPQRIDLKAPVKARYLRFVGKRVVEGSHVAVAELGVLEK
>tr|A0A3R5YDI0|A0A3R5YDI0_9BACT Uncharacterized protein OS=Akkermansia muciniphila OX=239935 GN=C1O59_04830 PE=4 SV=1
MVLTCKHHDDFCLWPTKTTRHSVAASPWKQGKGDVVKEVSRACGKYGVRFGVYLSPWDRN
AASYGTPDYIRMYRRQLKELATGYGPIFLAWFDGANGGDGYYGGAREKRSIDRSTYYDWK
TTWGELKKRQPGAVIFSDVGPDVRWVGNESGYAGYPCWATYTPVPLQAGTEPAPGAVRYR
LGTEGTMDGKYWIPAEVDVSIRPGWFWHEHENSRVRTPENLLKLYFDSVGRGANLNLNVP
PDRRGRIHEEDKKSLAGFRVLLDELYSRNFASGAQVESSSSRKGHGAEQVLDRKRTTYWV
AAPEDKHPCVVLKLPKPAAFDVIRLAEPIQLGQRVRKFRVEVRENGQWSRWAEGVSIGAR
VLLKGRPVTADGVRVVLEQSRAVPALCEVSLWKYPVILNAPAVSYDRNGRVTLASAENVV
IRYTTDGTEPGPQSAVYRNPFLLPAGGTVKAAAEYRGRKSSVTTQLIPVPTRDWKVVSGE
RSAAAPELAIDGDSSTLWHTHAAQGELAPPQALEIDMGRPVNVASVIYTPRRDSATGTID
RYAVYLSADGNTWGAPVAEGEFSNIRANPVPQRIDLKVPVKVRYLRFVGKRVVEGSHVAV
AELRVLEK
>tr|A0A410E4M8|A0A410E4M8_9BACT Uncharacterized protein OS=Akkermansia muciniphila OX=239935 GN=C1I88_04810 PE=4 SV=1
MNLNQLIKAAVLGGALCTACFAGAGPKGCLTPLKPVPSAEQLEWHDMEMYAFVHFTINTF
TGKEWGYGDEKPELFHPSDFDADDLVRTLADAGFKGVVLTCKHHDGFCLWPTKTTLHSVA
ASPWKQGKGDVVKEVSRACGKYGVRFGVYLSPWDRNAASYGTPDYIRMYRQQLKELATGY
GSIFLAWFDGANGGDGYYGGARERRSIDRSAYYDWKATWGELKKRQPGAVIFSDVGPDVR
WVGNESGYAGYPCWATYTPVPLQAGTEPAPGTVRYRLGTEGTMDGKYWIPAEVDVSIRPG
WFWHEHENSRVRTPENLLKLYFDSVGRGANLNLNVPPDRRGRIHEEDKKSLAGFRVLLDE
LYSRNFASGAQAESSSSWKGHGAEQVLDRKRTTYWVAAPEDKHPCVVLKLPEPAAFDVIR
LAEPIQLGQRVRKFRVEVRENGQWSKWTEGASIGARVLLKGRPVTADGVRVVLEQSRAVP
ALCEVSLWKYPVILNAPAVNYDRNGRVTLASAENVVIRYTTDGTEPGPQSAMYRNPFFLP
AGGTVKAAAEYRGRKSSVTTQIIPVPTRDWKVVAGERSAAAPELAIDGDSSTLWHTHAAQ
GELAPPQALEIDMGRPVNVAAVIYTPRRDSATGTVDRYAVYLSMDGNTWGAPAAEGEFSN
IRANPVPQRIDLKAPVKARYLRFVGKRVVEGSHVAVAELGVLGK
>tr|A0A410SAJ5|A0A410SAJ5_9BACT Uncharacterized protein OS=Akkermansia muciniphila OX=239935 GN=AKKM5201_04935 PE=4 SV=1
MNLNQLITAAVLGGALCATCFAEARPEDVLTPLTPVPSAVQLEWHDMEMYAFIHFTINTF
TGKEWGYGDEKPELFHPSDFNADDLVRTLADAGFKGVVLTCKHHDGFCLWPTKTTRHSVA
ASPWKQGKGDVVKEVSRACGEYGVRFGVYLSPWDRNAASYGTPDYIRMYRRQLKELAAGY
GPIFLAWFDGANGGDGYYGGAREKRSIDRSTYYDWKTTWGELKKRQPGAVIFSDVGPDAR
WVGNESGYAGYPCWATYTPVPLQAGTEPAPGAVRYRLGTEGTMDGKYWIPAEVDVSIRPG
WFWHEHENSRVRTPENLLKLYFDSVGRGANLNLNVPPDRRGRIHEEDKKSLAGFRVLLDE
LYSRNFASGAQVESSSSRKGHGAEQVLDRKRTTYWVAAPEDKHPCVVLKLPKPAAFDVIR
LAEPIQLGQRVRKFRVEVRENGQWSRWTEGVSIGARVLLKGRPVTADGVRVVLEQSRAVP
ALCEVSLWKYPVILNAPAVSYDRNGRVTLASAENVVIRYTTDGTEPGPQSAVYRNPFLLP
AGGTVKAAAEYRGRKSSVTTQLIPVPTRDWKVVSGERSAAAPELAIDGDSSTLWHTHAAQ
GELAPPQALEIDMGRPVNVASVIYTPRRDSATGTIDRYAVYLSADGNTWGAPAAEGEFSN
IRANPVPQRIDLKAPVKARYLRFVGKRVVEGSHVAVAELGVLEK
>tr|A0A411SRH5|A0A411SRH5_9BACT Uncharacterized protein OS=Akkermansia muciniphila OX=239935 GN=EYB66_03370 PE=4 SV=1
MNLNQLIKAAVLGGALCTACFAGAGPKGCLTPLKPVPSAEQLEWHDMEMYAFVHFTINTF
TGKEWGYGDEKPELFHPSDFDADDLVRTLADAGFKGVVLTCKHHDGFCLWPTKTTLHSVA
ASPWKQGKGDVVKEVSRACGKYGVRFGVYLSPWDRNAASYGTPDYIRMYRQQLKELATGY
GSIFLAWFDGANGGDGYYGGARERRSIDRSAYYDWKATWGELKKRQPGAVIFSDVGPDVR
WVGNESGYAGYPCWATYTPVPLQAGTEPAPGTVRYRLGTEGTMDGKYWIPAEVDVSIRPG
WFWHEHENSRVRTPENLLKLYFDSVGRGANLNLNVPPDRRGRIHEEDKKSLAGFCVLLDE
LYSRNFASGAQAESSSSWKGHGAEQVLDRKRTTYWVAAPEDKHPCVVLKLPEPAAFDVIR
LAEPIQLGQRVRKFRVEVRENGQWSKWTEGASIGARVLLKGRPVTADGVRVVLEQSRAVP
ALCEVSLWKYPVILNAPAVNYDRNGRVTLASAENVVIRYTTDGTEPGPQSAMYRNPFFLP
AGGTVKAAAEYRGRKSSVTTQIIPVPTRDWKVVAGERSAAAPELAIDGDSSTLWHTHAAQ
GELAPPQALEIDMGRPVNVAAVIYTPRRDSATGTVDRYAVYLSMDGNTWGAPAAEGEFSN
IRANPVPQRIDLKAPVKARYLRFVGKRVVEGSHVAVAELGVLGK
>tr|R6IZP0|R6IZP0_9BACT Coagulation factor 5/8 type domain protein OS=Akkermansia muciniphila CAG:154 OX=1263034 GN=BN502_01046 PE=4 SV=1
MNLNQLIKAAVLGGALCTACFAGAGPEGCLTPLKPVPSAEQLEWHDMEMYAFVHFTINTF
TGKEWGYGDEKPELFHPSDFDADDLVRTLADAGFKGVVLTCKHHDGFCLWPTKTTLHSVA
ASPWKQGKGDVVKEVSRACGKYGVRFGVYLSPWDRNAASYGTPDYIRMYRQQLKELATGY
GSIFLAWFDGANGGDGYYGGARERRSIDRSAYYDWKATWGELKKRQPGAVIFSDVGPDVR
WVGNESGYAGYPCWATYTPVPPQAGTEPAPGTVRYRLGTEGTMDGKYWIPAEVDVSIRPG
WFWHEHENSRVRTPENLLKLYFDSVGRGANLNLNVPPDRRGRIHEEDKKSLAGFRVLLDE
LYSRNFASGAQAESSSSWKGHGAEQVLDRKRTTYWVAAPEDKHPCVVLKLPEPAAFDVIR
LAEPIQLGQRVRKFRVEVRENGQWSKWTEGASIGARVLLKGRPVTADGVRVVLEQSRAVP
ALCEVSLWKYPVILNAPAVNYDRNGRVTLASAENVVIRYTTDGTEPGPQSAMYRNPFFLP
AGGTVKAAAEYRGRKSSVTTQIIPVPTRDWKVVAGERSAAAPELAIDGDSSTLWHTHAAP
GELAPPQALEIDMGRPVNVAAVIYTPRRDSATGTVDRYAVYLSMDGNTWGAPAAEGEFSN
IRANPVPQRIDLKTPVKARYLRFVGKRVVEGSHVAVAELGILGK
>tr|A0A1Y4KXL8|A0A1Y4KXL8_9FIRM Uncharacterized protein OS=Lachnoclostridium sp. An181 OX=1965575 GN=B5F18_08000 PE=4 SV=1
MRKRKRMKRFAAVSLAAATVLSMNVPVSSAQEVTAPKPYGPTPSDAQMKYYKDELAIFNH
FGVNTYTDKEWGDGKEDPDIFNPVNLDTDQWIEAFKNTGFKRCLITAKHHDGFNLYPTSV
TDHSVESSSWRDGKGDVLKEYYESCKKYDMDMGVYLSPWDQNLPSYSVDVPPDYNDTYVK
QIEEIFENYSDPEHPIVEFWMDGACGDPETRPVYDIQRWWDKLEELNPDIVYQQNYGAPL
RWVGNESGYASNTSWQTADAKKLWDDYFVRGIEDQNYLHNGEPYIEGSSTADTLVWSIPE
VDVRIRDGWFYHANENPKTPEELTKIYFDSVGRGSPLLLNVAPNREGLIDQKDIDSLEGF
HDILTNTFDVNYAEGSAAAATSVRGNHNDYSAAKAVDDDYDTYWTMDDGQTTGSITVELD
KPSLIDVVEIQEYIPLGQRISSFTVDVRVNGRWMEYGEGGTIGYKRLVKGTPIKAEAVRV
NITGSYAVPLINNIAAYKADERIEEEGVQIPGRIQAAEFQEKSGGLIAENNGPNGASNIG
AIKDGDCAVYKNVLFTKTPEKFLLNCAGPGTPQITLRLDSVDGPVLATVDVEPTGDYFAY
HTMEADVVYEGDLTGYHDIYLCLNSGLNITWFELTGANSMGFAADKLTVNEGESVDVTVT
RSGKDLDNTASVTVTTEPDTAVHGRHFVHKQEVVTFAPGETEKTVTIETIDNEEKSGTVS
FKAVLSNPSDNATIGSVDTVTISIMDNDLGSGVNAQWKMDEGEGTTITDTEGQYQGTLSA
GVSWADGRVGGGLSFDGTSGYVNLGMEDLEGPWTVAVWVKRAQASGDNAVLLSGTEGEIK
LEQYQNTQKVGITKFGVADEVFNYSTPAGTWTHLALVCDGENSTSLYANGEFVGTIDMAI
KCPVSRIGANDKAGLDSAGYMAGTLDELKIYDHMLSADQIADIVEHEGGKPLDKNFAEAP
EYDEENNQLILPKAEGYDIEVFGSDNKATVSLDGEVTRPLETQTVKLLYKITNKEDGSSF
TTEKNAEVTIPARENSVEGENEKPNVIPELREWVGGTGEVDLTDARIVLGDEEFKAAADT
LEEDYEDITGRNIDVVSGDKDSLQAGDIFLSKAEGEDMLGSEGYYLNIGGDNADEDYVEI
KATHNTGSLYGGISILQILKQDEDGRDTLPKGLVKDYPEFEQRGMHLDVARKWIPMEYLK
DLAKQMSWYKLNLFAIHLSDNDIWEGLSTENGSNGAAQGWFRLESETFPELTSKQHYTKE
EFRNFQYESMDLGINVIPELDTPGHALAYTQAWGEDTARYDNPKYLDVLNPQVLENTKAL
FDEYINGYNGGEPTFVGDYVNIGTDEYKTDGLPSNERTQYREGFRQYCNDLLEYVNSTGK
EAVFWGSLTENSGETPVTTDAVMYAWYQGYANAKQSLDAGYRVISMEDQDMYIVPGGSSY
PNQFGRAEHLYNNWLPNNNSGWAGNPAPEGHPRVLGGQFAVWNDFHGNGISVNDISYRIQ
HNLYAVAEKTWAGTQANEAGKTYEDVKNLAAELGDAPNADFMYEVDKEVVDNELLKLDGK
ADNAAQAGAEVTGNENVTENAAGKNGTAIQFNGGASYITTDVKSPGFDWTAAMWLKPEAD
GVLMEGKTGTLRLEDGKLKYDVEDYTHTFDCDIQYGEWTHLALTGTYEGVTLYINGEKFA
SLIGTPFPNWNVNSGCNLDDGRGYPVNEKGERTQRYYETLMLPMEVIGSKENAMQASVDE
LYIYDRVLTENEIIKLSGAEIPFNIALNKDVTVGNYHSASTEADRSGSKAVDGDLTSRWE
FDLNNTDTNFIEIPLNDNESAQKVIIKQMVWGGLNRITDIRIVAVNDGVETDILPETAFD
GGEIDAANQIATATYDLGQSVKADAIKIYLTPAAAGPDDLVNIRELEVYGIVSDEPAEEL
STAVLEYALELAKKADTTGVVESVVKKFEEARTNTQAIFDAAKAGDASVTQEMVDNAWRE
LIHVMQYLSFKQGDKTDLEKVIALAADIEGRLTSYVEEGQKEFTDALTAARKVYDSKDAM
QTEVDQAWKDLLRAMANLRLKADKDALEELVSGVEEMDLSMYTEESVQVFRSALANAQQI
LADATLSEDDQSTVDAAEEKLASAKAGLETKQASVGTASKTDDQKGSTTGKNINNTEGGN
QDKAATSVDKATVKSAKTGDESALWLIAAAGLAALAATLAGAKKKR
>tr|A0A1Y4KXN1|A0A1Y4KXN1_9FIRM Uncharacterized protein OS=Lachnoclostridium sp. An181 OX=1965575 GN=B5F18_08120 PE=4 SV=1
MKKKKAAALLLAAAMTVGALPGWAVPTVQAAEVSAGDLTDTDTEAPAAWGALPNANQYKY
QKDELAAFCHFGMNTYTGSEWGNGKENPSQFALKNDFDAATLVKLIHDAGFKKLIITAKH
HDGFCIWPSAYTEHDTETAGYDGDILAEISAECTKYDIDMGLYLSPWDENAPSYGYYDEN
GNALCGSNGQPLNGMTWEEVYEKDAKDYNEYYDNQLREILGNPKYGNDGTFVEVWMDGAK
GGGADAQTYDFQRWFSTIQELQGKAAGKPADCMLFGAEAYTTVRWIGNEDGLANEETWSK
SNVNYENNTIDSNKKGSYYIGYEDGNQWTVPECDGRLTSGWFWGNNKKTPKTIEQLATMY
FGSVGHNGTMLLNIPPNTEGTIDQAMIERIQEFGENIRQTFDSNMAAGDDVSITASEVRG
NDIDFSPANVLDGNDDTYWTTNDGTNTGSITIDLGKTRTFDVVSIEEAIQLGQRIKSFKV
EYKNGDGEWKTFQEGTTIGAKRLCRNSSVKADKVRITVTTSEAVPILSEVGIYKASDDFA
LAGGIPDGMVTVDNTDKDTQDGYGFTYSGWTQETGTQYINGTNMWANAGASLKLEFTGTK
VYLMGTKDPNHGTADIYIDGDKVATIDTNATARSLGQMIFQSDDLADGKHTLELRVTNKA
IGIEAAAVLDNGGKGMFEIENPEYTMNEDSEMQLKIKRIGGSEGEVSVKVNKEPGSAVQG
DFDTTVIPDVVFGDGETEKEVTIRTTRNQKVTGDQYFTVTLSDTTNDAVLGFNDSAKIII
KDADSITKEKLQTLTEEVKKLQKDHYVSGWEELQDALAEAESVLAQENPNNTAVINAYTA
LESAKNALEKRTSYTEEDPLVLPGTKSESVLAEAEFFTLDSSDAEAGKEVRIVKSEEDSN
GAHVGWFEQGNKIMINYDAPKTGTYNVNMTYVSGRPENNANDIHWTEKDGKIKDGSIEVY
RASASDQGTVVQNIDFEIEVTKAGAGTLTLTTNNGGPNLDKFVIEPKELDWDTYKITATA
GKGGSISEEGETEVVEGDSKTYTITPDEGYAVKDVLVNGKSVGAVTEYTFENLTADATIE
ATFELKNYTEANPFAFPEKEGETKTLEAEYAILHNTGENEDWPLEVAKADWASNGKFVNS
LNSNDSITYHYSAVAGVYTVKADYRSGDPNNSLAWAEKDGKITEGTVSAGASDSAAATHS
VEFEITVNEDGTGEWTFTGPAKKSPQLDKFEITLKEAKEPEQPEEPTEISTAVLEYAISL
AGKAQTEDVIPMIVKEFETRLADAEDILAKVKEGDKDVTQEMVDNSWKALIDIMQYLEFK
QGDKTDLEKAIDFAESLDMNDYEDNEKMDAFLEALDAAKDVRDDENAMQDEIDEAWKALI
KATAELNRKMADMTDLNKVIEWTSALDLNKYLEEGQDEFKAALEAAKSVAGDIFSTQKEV
DNAWKALMDAASALRLKPDKSALDELLKTAESYIAKEGEYEAAAFAAFQTAYADATAVFE
NEQATGDEVRAAEKSLGDAIAKLDSSTGTADEKAEVVANAGASTTNNVSDKSDTAKKETA
PAAKSAKTGDTVNVVIPSLAALAAAAVALAARRKRR
>tr|B3JKE3|B3JKE3_9BACE F5/8 type C domain protein OS=Bacteroides coprocola DSM 17136 OX=470145 GN=BACCOP_02372 PE=4 SV=1
MKNLNQFLVCLFLSLLSVVGQAQRNTPYFVKHLQFSGNESLEQKAVMAARLIPSSQQLEW
QKMELTAFLHFGINTFTGREWGDGTEDPALFNPTDLDAEQWVRTLKECGFKMVLLTAKHH
DGFCLWPTKTTKHSVASSPWKNGKGDVVRELRDACSKYGMKFGVYLSPWDRNASCYGNSP
EYNKFFVAQLTELLTNYGEVHEVWFDGANGEGPNGKKQEYDWDTFYKTIQRLQPKAVMAI
MGDDVRWVGNEKGLGRDTEWSATVLTPGIYARSKENNKRLGVYETATDLGSRKMLENATE
LFWYPSEVDVSIRPGWFWHEEENSKIKSLKQLSDIYFRSVGYNSVLLLNIPPDRRGLINE
ADISRLKEFAAYRQQVFCDNKLINGNTYWKAAQGEKHVYTVRQNTPVNVVMLQEDISKGQ
RVENFIIEAWLNGSWQLLGKGTTIGYKRMLRFPEVMTDSLRICIESTRLDANIMNVAAYY
AQPLIDEEQLTTWNNLSRDSWKKISVSPLTVDFGKTVTVKAFTYAPLNEEAKPTMAYHYK
LYISLNGTDWQEVISNGEFSNIMHNPLPQTVALPQSKQARYIKIEATTPNASTAVIELEE
LGVTVISDDNK
>tr|A0A1Y4M301|A0A1Y4M301_9FIRM Uncharacterized protein (Fragment) OS=Pseudoflavonifractor sp. An176 OX=1965572 GN=B5F12_08645 PE=4 SV=1
MYMKGKRPAKRGLALALAGTMLASTVVGTSFPMAWAAEPTYIGDASLTDNATPAPTPDTV
LPNANQYWYQKAELSAFCHFGPNTFNEIEWGEHYGDKTPDEIFKLETDFDADTMVKTLKD
AGFQMLIVTAKHHDGFCIWNSAYTEYDVANTSYKNGQGDILAELSEACTKYDMNMGLYLS
PWDIHDDSYGYYDANGNPTSKENDVLDYNEYYNNQLQEILGNDKYGNDGHFIEVWMDGAK
GSGANAQEYDFQKWFNTIQSNEGKKAGYEADCMLFGAEAYTTVRWIGNENGYAADDTWSK
SMVNYDNNTINSGSQGGYTVGLENGNQWTVPECDARITSGWFWGTTKNTPKTIAALGEMY
FRSVGHNGTFLLNVPPNNQGTVDQAILDRVTEFGQNVQETFKKNLATSVQATNVRGNDVA
YKPGNTIDGNDATYWTTEDGTNEGTLLIDLGGVKSFDVVSVEEAIQNGQRINSYKVEYRD
ASGEWHEMQSGQTIGAKRLVRTGAVRGDQVRITVSTPDGKVPMISEVGVYKASEGFELSG
AAPDGMDVIDIKNGAFQFSNGWTDETGSQFIGGTNKWANAGATFTVNFTGSKIYLLGTKD
PNHGKADIYIDGEKVSTIDTNASARALGQYIFVSEDLADGEHTLELRVTSKAIGIEAAYT
INNGGKGMIGIEESRYTMNEDQRMDVKLVRVGGTSDEPVTVRLSPNPGSAIQDDFNTELN
TEVTFQPGETEKTAPVETRRNTNITGDREFTIELSSADKDVILGFNPIATVTIKDMDSAS
REQLEALVNEAEGTLGEWYSSGWDAYAQAVAQGKELLASTDADQEAMAQAVAAIQAAKGA
LVEREQYSADDPVPFPWQPNSTYTVEAEFAILKNTGEGEAWPLQVSEASWASHGKFVNCL
NQNDTISFPYVADRTGTYTVTATYRSGDTNNSLAWSEVDGKITSGTVSAGAGDSATATHT
VTFDIEVTEAGAGTLVFTGPAKKSPQLDKLVITPKNIDYQTCNVTVTANAGGTVSPAGTT
AVTEGESFTLTITPDAYYHVESVVVN
>tr|A0A1Y4KGX8|A0A1Y4KGX8_9FIRM Uncharacterized protein (Fragment) OS=Pseudoflavonifractor sp. An187 OX=1965578 GN=B5F22_08760 PE=4 SV=1
MYMKGKRPAKRGLALALAGTMLASTVVGTSFPTAWAAEPTYIGDASLTDNATPAPTPDTV
LPNANQYWYQKAELSAFCHFGPNTFNEIEWGEHYGDKTPDEIFKLETDFDADTMVKTLKD
AGFQMLIVTAKHHDGFCIWNSAYTEYDVANTSYKNGQGDILAELSEACTKYDMNMGLYLS
PWDIHDDSYGYYDANGNPTSKENDVLDYNEYYNNQLQEILGNDKYGNDGHFVEVWMDGAK
GSGANAQEYDFQKWFNTIQSNEGKKAGYEADCMLFGAEAYTTVRWIGNENGYAADDTWSK
SMVNYDNNTINSGSQGGYTVGLENGNQWTVPECDARITSGWFWGTTKNTPKTIAALGEMY
FRSVGHNGTFLLNVPPNNQGTVDQAILDRVTEFGQNVQETFKKNLATSVQATNVRGNDVA
YKPGNTIDGNDATYWTTEDGTNEGTLLIDLGGVKSFDVVSVEEAIQNGQRINSYKVEYRD
ASGEWHEMQSGQTIGAKRLVRTGAVRGDQVRITVSTPDGKVPMISEVGVYKASEGFELSG
AAPDGMDVIDIKNGAFQFSSGWTDETGSQFIGGTNKWANAGATFTVNFTGSKIYLLGTKD
PNHGKADIYIDGEKVSTIDTNASARALGQYIFVSEDLADGEHTLELRVTSKAIGIEAAYT
INNGGKGMIGIEESRYTMNEDQRMDVKLVRVGGTSDEPVTVRLSPNPGSAIQDDFNTELN
TEVTFQPGETEKTAPVETRRNTNITGDREFTIELSSADKDVILGFNPVATVTIKDMDSAS
REQLEALVNEAEGKLGEWYSSGWDAYAQAVAQGKELLAATDADQEAMAQAVAAIQAAKSA
LVEREQYSADDPVPFPWQPNSTYTVEAEFAILKNTGEGETWPLQVSEASWASHGKFVNCL
NQNDTISFPYVADRTGTYTVTATYRSGDTNNSLAWSEADGKITSGTVSAGAGDSATATHT
VTFDIEVTEAGAGTLVFTGPAKKSPQLDKLVITPKNIDYQTCNVTVTANEGGTVSPAGTT
AVTEGESFTLTIT
>tr|A0A1Y4N7A8|A0A1Y4N7A8_9FIRM Uncharacterized protein OS=Erysipelatoclostridium sp. An173 OX=1965571 GN=B5F09_08040 PE=4 SV=1
MKNKKMMRKIAAAAMAGALVLPATVSSSKAQTLDGWVDDSQLNNSEVAAPEAYGPTPDAL
QYEYQKQELAAFCHFGPNTFNEIEWGENYGNTPPAEIFTLGPNDDFDAETLVETLKNAGF
KRLIVTAKHHDGFCIWASEYTKYDVASTNYKNGEGDILAEISKACSDYDMDMGLYLSPWD
IHDQSYGYFDKDGNALVGSDGQPLNGMSWEEVEEKDVYDYNEYYRNQLEEILGNDKYGNK
GEFVEIWMDGAKGSGYKTQNYNFDDWFATIQKYEGKEAGREADCLLFGSGAKTTVRWIGN
ELGFAPDTNWAQAKLIYKDGKATDIDTGWDESTGYAAGYPDGDVWTVPECDARITSGWFW
GNTKKTPKSMEELSEMYFRSVGHNGTLLLNVPPNDEGKLDKAIQERIVEFGNAVKNTFKT
NKAEDKAAYADTVLGNSKAYSASNVLDGDQDTYWTPEAGNSMGSVLIDLGETTNFDVVSI
EEAIQLGQRITNYKVEYSNDLQSWETMDEGTTVGSKRLSRTSPVKARYVKVTVSTNEDTS
PLISEIGVYKATGGLELNSSVPEGLTVVDNTDKDTSDGFGFTYNNSWVQEKGKDFINGTS
MYANEGSELTLNFHGTKAYLMGTLDPNHGKAMISVDNGPEVEIDTKASKRSVGNVLYASD
DLEDGDHTLTLRVVSDAIGIEAAAVIDNQGKGMFEFEHNAYRVLEAEDESATLEHKLTVK
RVGGTNGEAVVQVENNPGTAMQSNYDANLSGGTLTFAPGETEKQVSLYTKYDSRIQGDTS
FTMNLVNATNDVIIGFNKVATITIEDRDVKTKEQLAELIAQGEILNTQEYLYVSGWDAFQ
DAFKAAKETLADSDATIIQYGNAYRNLTVAINGLVVRDNYSEEDPFIMPVKKDETKVLEA
ELATLKNTGENEEYVLAVEERDWASNKKIINCFNAGDQIEVPYNASRAGKYKVVLTYRSG
SEENSFDVSEVDGKIKNVSVVAGNDDATVTKTKEFEIEVVEAGAGTLVLTASTKNGPQLD
KLDITASDLNWKEFTIKATAGTGGTITPSGDNVYTELSDVTYTITPDNGYEIEDVKVNGE
SQGAITSYTFTELSKDSTIEATFKFKYYNESTPFEFPEKIGSENKVTLEAEKTELINTGD
ANEQWKLGIESGTWASGGQFVNCLNSGDQLVIHYNAPNAGIYQFTATYRSGSDTNKLVWS
GDKVIDGEVAAGNSDASVVKTVDFLVEITEAGKGKIVFTAPSTNSPQLDKFDIVYFSDKE
SMARADLKALIEDAKAILENASDYQTATIENLKTVLAKVEDVYENDEASVEQLEQAKADL
QTAIDGLLEVVDKTELTQYIAKVQEIVDNIDDYSKYSVYGLEENLAKAKEVYNNENATEN
EVAAMVRTLKYGVENARKKAFIEDLEKLVAQAKAIDLEGYTPASVDVFELVLSDAQTLLD
SDLSFENQDSVDKMYDRLSKAINLLTKISDLEEDPGQTPDKPGDKPGSGDSGDNNNNGSQ
NPSNGNNDSSNPGNGNASKTGDDINMAPFMVLMALSCLGAWEVLKRTKEIDY
>tr|A0A1Y4QRP9|A0A1Y4QRP9_9FIRM Uncharacterized protein OS=Erysipelatoclostridium sp. An15 OX=1965566 GN=B5E92_05705 PE=4 SV=1
MKNKKMMRKIAAAAMAGALVLPATVSSSKAQTLDGWVDDSQLNNSEVAAPEAYGPTPDAL
QYEYQKQELAAFCHFGPNTFNEIEWGENYGNTPPAEIFTLGPNDDFDAETLVETLKNAGF
KRLIVTAKHHDGFCIWASEYTKYDVASTNYKNGEGDILAEISKACSDYDMDMGLYLSPWD
IHDQSYGYFDKDGNALVGSDGQPLNGMSWEEVEEKDVYDYNEYYRNQLEEILGNDKYGNK
GEFVEIWMDGAKGSGYKTQNYNFDDWFATIQKYEGKEAGREADCLLFGSGAKTTVRWIGN
ELGFAPDTNWAQAKLIYKDGKATDIDTGWDESTGYAAGYPDGDVWTVPECDARITSGWFW
GNTKKTPKSMEELSEMYFRSVGHNGTLLLNVPPNDEGKLDKAIQERIVEFGNAVKNTFKT
NKAEDKAAYADTVLGNSKAYSASNVLDGDQDTYWTPEAGNSMGSVLIDLGETTNFDVVSI
EEAIQLGQRITNYKVEYSNDLQSWETMDEGTTVGSKRLSRTSPVKARYVKVTVSTNEDTS
PLISEIGVYKATGGLELNSSVPEGLTVVDNTDKDTSDGFGFTYNNSWVQEKGKDFINGTS
MYANEGSELTLNFHGTKAYLMGTLDPNHGKAMISVDNGPEVEIDTKASKRSVGNVLYASD
DLEDGDHTLTLRVVSDAIGIEAAAVIDNQGKGMFEFEHNAYRVLEAEDESATLEHKLTVK
RVGGTNGEAVVQVENNPGTAMQGNYDANLSGGTLTFAPGENEKQVSLYTKYDSRIQGDTS
FTMNLVNATNDVIIGFNKVATITIEDRDVKTKEQLAELIAQGEILNTQEYLYVSGWDAFQ
DAFKAAKETLADSDATIIQYGNAYRNLTVAINGLVVRDNYSEEDPFIMPVKKDETKVLEA
ELATLKNTGENEEYVLAVEERDWASNKKIINCFNAGDQIEVPYNASRAGKYKVVLTYRSG
SEENSFDVSEVDGKIKNVSVVAGNDDATVTKTKEFEIEVVEAGAGTLVLTAGTKNGPQLD
KLDITASDLNWKEFTIKATAGTGGTITPSGDNVYTELSDVTYTITPDNGYEIEDVKVNGE
SQGAITSYTFTELSKDSTIEATFKFKYYNESTPFEFPEKIGSENKVTLEAEKTELINTGD
ANEQWKLGIESGTWASGGQFVNCLNSGDQLVIHYNAPNAGIYQFTATYRSGSDTNKLVWS
GDKVISSEVAAGNSDASVVKTVDFLVEITEAGKGKIVFTAPSTNSPQLDKFDIVYFSDKE
SMARADLKALIEDAKAILENASDYQTATIENLKTVLAKVEEVYENDEASVEQLEQAKADL
QTAIDGLLEVVDKTELAQYIAKVQEIVDNIDDYSKYSVYGLEENLAKAKEVYNNENATEN
EVAAMVRTLKYGVENARKKAFIEDLEKLVAQAKAIDLEGYTPASVDVFELVLSDAQTLLD
SDLSFENQDSVDKMYDRLSKAINLLTKISDLEEDPGQTPDKPGDKPGSGDSGDNNNNGSQ
NPSNGNNDSSNPGNGNASKTGDDINMAPFMVLMALSCLGAWEVLKRTKEIDY
>tr|A0A1Y4NBI5|A0A1Y4NBI5_9FIRM Uncharacterized protein OS=Erysipelatoclostridium sp. An173 OX=1965571 GN=B5F09_03775 PE=4 SV=1
MKKRKVMKGVLAAALATTLVSQFAYTAVNANMLDDSDLENKNVVEPEAWGAVPNEAQLQY
HEEELAAFVHFGMNTFTDKEWGDGQEDPLSFNPTGDIATYADSYVEALKNAGFKRLIVTA
KHHDGFCIWPSAYTEHDIENSPYKDGKGDVLAEISAACTKHNMDMGLYLSPWDVNAESYG
YYDENGNSLLDESGNPINGMTMDEVKEKDALDYNDYYVNQITEIVTNPIYGNNGRFVEWW
MDGAKGEGGDAQEYDMDRILSTIKENEPGVLIFGGGTDGGIHWIGNEKGQASEETWAKVD
SEKGDGYSEADGFTYGIPDGDHWSVPESDVSITAGWFYHDGDNPKSMSQLSKIYFDTIGN
GSPLLLNFPPNKTGDLDGTIYSRLNEFKNAIAETFDTNLVTGASASASSVYENALQYSPT
KVIDGDDETYWTTEKGTNTGVIEIQFDEAKQFDVVSIEEYITKGQRISEFNVEYQRENGE
WAVFGDGKTIGAKKLLRSDPVTATAIRINITGSQAEPMISEVGVYEAADDFKATQPLPAA
YTKFVPGDEGLSLNKGSWDNDGKGNTGWHEQADGSYTTTDGWANIKYTFEGTYFALVGTK
GPNYGAFDIYIDGKYTSSASCSAASETPNQILYESPTLSNGEHSIQLTTGTNRGKVNFAY
GYYLGVNENGLFEIEADSYQVNEGDAVKVKIKRNGGSTGEVTVNVTTPPGTAVQGQYYEN
ITNETITFKDGEKTKYITVQTIDNLSVTGNKDFYVEIFTPTGGAELGMKSTARVVIIEDD
VRIADAVEQTSNISESWYKAENWAEFDAAYLNAKAAVDNPDLSDDDKMRLSNALLEAYGN
LQTISQYTVRNAMIMPDEFDEEKLLEAELGVLDSSHDNIVKDEYLKMVNGNDYSNGRMID
KIKEGNTITVPLNTTHAGTYSFDFDYKATADMTLSISGEGIQSQTVELKAADAQMSTKSI
DVIVDNPGITNLVITATGEGMVALDGAKVTLKNVDEGDVTAIEIVSKPSKTVYTVGDELD
LTGMQVVAKLKDGTTMDVTNRVTVTGFDSSSEGTKTVTVHYGTEFSATFEIIVKGKVDNV
TDGDDNNSTQDPSVSEKPGANNGQNANATDTGDQQTMAIFALGIIISGAVYIVVKRKKEY
DHN
>tr|A0A1Y4QS51|A0A1Y4QS51_9FIRM Uncharacterized protein OS=Erysipelatoclostridium sp. An15 OX=1965566 GN=B5E92_05125 PE=4 SV=1
MKKRKVMKGVLAAALATTLVSQFAYTAVNANMLDDSDLENKNVVEPEAWGAVPNEAQLQY
HEEELAAFVHFGMNTFTDKEWGDGQEDPLSFNPTGDIATYADSYVEALKNAGFKRLIVTA
KHHDGFCIWPSAYTEHDIENSPYKDGKGDVLAEISAACTKHNMDMGLYLSPWDVNAESYG
YYDENGNSLLDESGNPINGMTMDEVKEKDALDYNDYYVNQITEIVTNPIYGNNGRFVEWW
MDGAKGEGGDAQEYDMDRILSTIKENEPGVLIFGGGTDGGIHWIGNEKGQASEETWAKVD
SEKGDGYSEADGFTYGIPDGDHWSVPESDVSITAGWFYHDGDNPKSMSQLSKIYFDTIGN
GSPLLLNFPPNKTGDLDGTIYSRLNEFKNAIAETFDTNLVTGASASASSVYENALQYSPT
KVIDGDDETYWTTEKGTNTGVIEIQFDEAKQFDVVSIEEYITKGQRISEFNVEYQRENGE
WAVFGDGKTIGAKKLLRSDPVTATAIRINITGSQAEPMISEVGVYEAADDFKATQPLPAA
YTKFVPGDEGLSLNKGSWDDDGKGNTGWHEQADGSYTTTDGWANIKYTFEGTYFALVGTK
GPNYGAFDIYIDGKYISSASCSAASETPNQILYESPTLSNGEHSIQLTTGTNRGKVNFAY
GYYLGVNENGLFEIEADSYQVNEGDAVKVKIKRNGGSTGEVTVNVTTPPGTAVQGQYYEN
ITNETITFKDGEKTKYITVQTIDNLSVTGNKDFYVEIFTPTGGAELGMKSTARVVIIEDD
VRIADAVEQTSNISESWYKAENWAEFDAAYLNAKAAVDNPDLSDDDKMRLSNALLEAYGN
LQTISQYTVRNAMIMPDEFDEEKLLEAELGVLDSSHDNIVKDEYLKMVNGNDYSNGRMID
KIKEGNTITVPLNTTHAGTYSFDFDYKATADMTLSISGEGIQSQTVELKAADAQMSTKSI
DVIVDNPGITNLVITATGEGMVALDGAKVTLKNVDEGDVTAIEIVSKPSKTVYTVGDELD
LTGMQVVAKLKDGTTMDVTNRVTVTGFDSSSEGTKTVTVHYGTEFSATFEIIVKGKVDNV
TDGDDNNSTQDPSVSEKPGANNGQNANATDTGDQQTMAIFALGIIISGAVYIVVKRKKEY
DHN
>tr|B4FCX9|B4FCX9_MAIZE Alpha-L-fucosidase 1 OS=Zea mays OX=4577 GN=100192871 PE=2 SV=1
MAALVPLLLAHLLLCVHGATVTSVATPPPLPVLPVPSYAQLRWQLSEMALFLHFGPNTFT
DSEWGTGHADPSVFAPSALDAGQWARIAAQGGFGRVVLTAKHHDGFCLWPSALTEYSVAA
SPWQGGAGDVVAELAAAARAEGLGLGLYLSPWDRHEPVYGDTIAYNEHYLGQMTELLTRY
GDVEEVWLDGAKGDAKKMDYMFDAWFSLIHQLQERVVIFSDAGPDTRWVGDEAGVAGYTC
WSPFNKSSVTIGHTTAEYSSSGDPFGQDWVPAECDVSIRPGWFWHASEKPKNVTTLLDIY
YKSVGRNCLLILNVPPNSSGLIADEDIQVLQEFTEIRRAIFSQNFAANATVTANSVRGEQ
DNLQFAPSKVLEDGIYSYWAPQEGQTCWEMLFDLGQSTSFNLLQLQEPIQLGQRVIEFHV
AILVDELWQTIVEGTTIGYKRLLLFPVTESRYLKLTIDSARADPLISFFGVFMDPFSSIH
SLQNHVKPPRTNSNEVTMLRMAHASVNKSIDAM
>tr|B6UDD6|B6UDD6_MAIZE Alpha-L-fucosidase 1 OS=Zea mays OX=4577 PE=2 SV=1
MAALVPLLLAHLLLCVHGATVTSVATPPPLPVLPVPSYAQLRWQLSEMALFLHFGPNTFT
DSEWGTGHADPSVFAPSALDAGQWARIAAQGGFGRVVLTAKHHDGFCLWPSALTEYSVAA
SPWQGGAGDVVAELAAAARAEGLGLGLYLSPWDRHEPVYGDTIAYNEHYLGQMTELLTRY
GDVEEVWLDGAKGDAKKMDYMFDAWFSLIHQLQERVVIFSDAGPDTRWVGDEAGVAGYTC
WSPFNKSSVTIGHTTAEYSSSGDPFGQDWVPAECDVSIRPGWFWHASEKPKNVTTLLDIY
YKSVGRNCLLILNVPPNSSGLIADEDIQVLQEFTEIRRAIFSQNFAANATVTANSVRGEQ
DNLQFAPSKVLEDGIYSYWAPQEGQTCWEMLFDLGQSTSFNLLQLQEPIQLGQRVIEFHV
AILVDELWQTIVEGTTIGYKRLLLFPVTESRYLKLTIDSARADPLISFFGVFMDPFSSIH
SLQNHIKPPRTNTNEVTLLRMAHASVNKSIDAMYLLSVHLSVLLLVCPGHFNMPESLAR
>tr|A0A1Y4NJ33|A0A1Y4NJ33_9FIRM Uncharacterized protein OS=Anaeromassilibacillus sp. An172 OX=1965570 GN=B5F08_04200 PE=4 SV=1
MKKKKMLSVLMCGCMLMGSIVPLAGASAAETYAYDGYVDDSAATGASADIPSWGALPNDA
QLKYHKDGLAVFCHFGPNTFNGIEWGENYGTKTPNEIFTFAQDADFDAETIVKTAKEAGA
DRLMITAKHHDGFCIWDSETTNYDIAETDYFKYHQELDDGNGDILKEISDACTKYNLDMG
LYLSPWDIHEQNYGCFGDQNNNPSDNGAYTDYNELYQAQIREICTAKNDDGTYKYGNNNP
NRSGDRFVEWWMDGATGSGAYYQTYDWEGIFSAIRETNPDCQIFGTHKAGPELGSTGGIH
WIGNEAGIAAIETWAKVNKGESYEDKELYPRGEGGAIIGKAEGNKWSVPEADAKLLNAGW
FWSQSKQSSLLSMEKLGNMYFNTIGRGAVLLLNVSPNSSGTLDENQKNRLLEFGQSVKDI
FTTDLTEADGVTVYADSIYKNSETYKPSNLIDEYTLNTSVTKEERVYDETCWAPEDGAKE
GSVIIDLGSEQTFDTIKIEEYIQKGQRISEFTIEYMNERGQWKEFYSGKTIGSQSVTRHA
PVTSSQIRITVKSDYATPILNDVGIYKGPETFELEADDNIEFIVDESELDYKSIKDATRT
GSWQTSDNTHYWSAGTNSSVTFKFTGTAFYVKAIEDPNHSSFEVVVDGKSMGTVNLNNST
RIENKIVYYSDDIGYGEHTVELKTLNSSGKTCIDVYGIYGLNIEEGIFEVGNLTYDIAET
DTVQLEVVRKHGSKGAATVNFSTTTGSAQQNMNYEYKDGTLEFADGETSKVIDVKIYAHK
DTTSMLNFYLDINTAEGARLGLNTRAVINIHPADKTATLESLNALIAEAKALLDNPAVTE
EAKAYLNEKIAFAEKAAAQPDAEQSVYGGATTALQMAIDNAGVDSSVLNLAVSGTVAFEA
EDAKLEQAVAGDKNIHIVEGDNYSGGKKVGWVKAGDKIIIPFYAEAAGTYTMDMYAQSGR
VEGSGYTSNKFDISGTNVEETSVEFYGSVDAPIKKYTCEIVVTKSGAGELVLTAAADHDG
PDVDKFEFTCKEISQEGLLVLPTDGSEVSFEAEDAQLVPTVEDNEHLHTKESSKASGGVM
LDWYMAGDKVIIPFYAEKAGTYNVDIYAECGRVEGTKKPNRLLLTGKKIEEDELDFYGSS
ATAPQIEKRSYQIVVTESGIGELVFTAAEGYDGPNLDKLVFSLDVPVTVDKTALDAKIKE
AEAIENVYTANSFKALTDAIAAGKVIFDKDDAQQAEVDNAVTAITEAIEALAYNSGDTDH
DGALSISDVTAIQSHIVDKAVENFDEKLADANKDGKINIIDATTVQLVVSGKYTLDGDGN
IVH
>tr|A0A1Y4QGY4|A0A1Y4QGY4_9FIRM Uncharacterized protein OS=[Clostridium] spiroforme OX=29348 GN=B5E91_10205 PE=4 SV=1
MKLNKVLLSLAMTMSLATGMIGTTSVNAIDGYISDDDLSDTQTDAPKAWGVTPTNEQYRY
QKEELAGFVHFGPNTFNEIEWGENYGDQTPDEIFRLEKDFDAETLVKAFKDAGFKKIIVT
AKHHDGFCIWNSQYTDYDVASTSYKNGDGDILAEISEECSKYDIDMGLYLSPWDIHAPSY
GYYDENGNPTTADKDVLDYNDYYVNQLNEILGNDKYGNNGHFTEIWMDGAKGSGANAQEY
DFKRWYNTIQSQEGEEAGFDSECMIFQCGANTTVRWIGNENGYAAKDTWSKSNVNVEADT
CDDNKQGSYTVGYENGNKWTVPEADARITSGWFWGTKKNTPKSITDLGNMYFNSVGHNAP
LLLNVPPNTDGTVDDQILERLAEFGQNINETFDENLAAGADVKIGASSVRGNDITYKPGN
VIDGDDSTYWTVDDQGQSGTLLIDLGSTKSFDVVSIEEAIQFGQSINEYKVEYRNGDDGQ
WKTMDEGKTIGAKRLVRTGTVKADQIRITVDTNKTDALPIISEVGVYKTSDAFELAGSAP
DGMDVIDIEDTNINDGAGFAFSGTWNKESGTNFINGTNRYAYTGSSLTLTFTGSKVYLLG
TKDPNHGNATITIDDGTPINIDTSASSRATGQMLFASDDLTDGKHTLKLEITSKAVGIEA
AYAINNGGKGMIGLEASEYTMNEDERMNVKIVRVGGTKGTISAKLQPNPGTAIQDDFNTE
LISNIVMEDGVKEVTAPVETRRNTNATGDRMFSIELTDPSTDLILGFNDKANITIRDTET
SFLKELNELIKSVEHKQKGWYISGWEDFEQALAYAIETANTQNVSVTQIKQAITDLNNAV
NGLVEREKYTKEDPFIFPKQIGDVSSLEAEFASEIVNDPSNDNGWPCIVTEGSWASNGKF
VDAILQGDVVKYNYDVETAGTYHVKAYYRSGSNANKLSWSEENGKIESGEVSAGASSTAE
THIAEFDLNVLEAGEGVLVFTGPEGKSPQLDKLEIECIELQVDKTALNEKIKEADSLNEA
NYTADTWKVLQEALTNAKTIAAKEDASQEEIDNAYNALTNAIDNLKPVVTDVDKTALKIA
IDLANAITDEDLDKVIPIVANEFIAARDEANTVYNDISATQEEVNNAFDRLASAMHMLDF
VKGDKTALEAFINKVNDLVADQYTPATWEAFAEKLANAKVVLANENAMQEEVDSAYKELV
TAFLNLRLKADKSALQAFVDYVNDVDSSKYTETTWKMFEAKLNEANVVLKDENAVQVEVD
SAYNELVKAYLDLRLKPNKDLLEDLINQASGLNVANYTKASFDGLTKALNEAKVVFENPN
ATQKEVDSAKATLEKAINSLEANTPVDNTAKTPVNNGDTTSVKTGDESLVGMFATIALLS
VAGCVVLRRKEN
>tr|A0A1Y4SWY5|A0A1Y4SWY5_9FIRM Uncharacterized protein OS=Massiliomicrobiota timonensis OX=1776392 GN=B5E75_10785 PE=4 SV=1
MNKSKILKGTLAGTLAMTIVGSAVYSSNALVYDTDLEDKTVTEPESWGALPNEAQLQYHD
DELAAFIHFGVNTFTGNEWGDGTESPSVFNPTGDFGESAKSMVEALKNAGFKKVIVTAKH
HDGFCIWPSEYTEHDIENSPYKDGKGDILAEISAACTEYDMDMGLYLSPWDENAESYGYY
DKDGNPLLDENGNPIDGMTMEEVKEKDALDYNDYYVNQITEIVTNPKYGNHGKFTEWWMD
GAKGEGGDAQEYDTERILKTIKDNEPGILIFGGGTEGGIHWIGNEKGQASDTTWAKVDSV
KGDGYREADGFTYGIPDGDHWSVPESDVSITAGWFYHDGDLPKSMSQLGNIYFQTVGNGS
PLLLNFPPNQTGDLDGSIYSRLNEFKNAIDNTFKTNLLAQNSKAGASSVYENAKEYSPAK
TIDGDEDTYWTTEKGEKTGTLEIEFDEVKEFDVVSIEEYIEKGQRISEFEVEYQTADGQW
LPFEDGHTIGAKKLLRIDPVQAKAIRINITGSYAEPMISEVGIYKTADGFEKTQPLPEAY
TKFVYGDDERLELNKGSWDDDHQGNTGWEKQEDGSYTTTDGWANIKYTFEGTYFALVGTK
GPDYGSFDIYIDGKYTSSANASAGEITPGQILYESPTLGAGTHTIQLTTGTNRKPVNFAY
GYYLGTNENGLFEIETDSYQVTEGDSIKVKIKRNGGSTGEVTVNVTTPPGTAVQGQYYEN
ITNETITFKDGEKVKYVTLKTIDNLDVTGNKDFYVEIFSPTGGAQLGMRSTARILIVEND
KRIADAVEQTSNISESWYKAESWDAFDQAYLKAKAAVDDDSMSDDEKMKLSNALMEAYNN
LEVISQYSVRNAMILPDNFEDEKVLEVELGILDSKHENIVANEYLKMVNGSDYSNGRLIN
KIKDGNTITIPLNVQKTGLYNFDFTYQATQPMSLIISGDHIAKQTISLDASETLTEKSIP
LNIQETGVSQVVITAKSLAKSDGDLAIDNAKIKLQEVSNGKIESIAIEQMPSKTVYALGD
TLDLTGLKVIAKYDTGATTDITHKVEVTGFDSSKVGEQTLTVHYGEFETQFTVTVKGKSD
EINPGTDTPEKPGQDNPNQGNSGQTGEKPSTTPTVNGTTSSHDKVKTSDEQVIGVFVIAL
LGAACLFVVMKNKKSDSQD
>tr|A0A1Y3TDS0|A0A1Y3TDS0_9FIRM Uncharacterized protein OS=Massiliomicrobiota sp. An80 OX=1965658 GN=B5G32_10350 PE=4 SV=1
MNKSKILKGTLAGTLALTIVGSAVYSSNALVYDSELEEKTVAEPESWGALPNEAQLQYHD
DELAAFIHFGVNTFTGNEWGDGTESPSVFNPTGDFASSAESMVEALKNAGFKKVIVTAKH
HDGFCIWPSQYTAHDIENSPYKDGKGDILAEISAACTKYNMDMGLYLSPWDENAESYGYY
DKDGNPLLDENGNPIDGMTMEEVKEKDALDYNDYYVNQITEIVTNPKYGNNGKFTEWWMD
GAKGEGGDAQEYDTERILKTIKDNEPGILIFGGGTDGGIHWIGNEKGQASDTTWAKVDSV
KGDGYSEADGFTYGIPDGDHWSVPESDVSITAGWFYHDGDLPKSMSQLGNIYFQTVGNGS
PLLLNFPPNQTGDLDGSIYSRLNEFKNAIDNTFKTNLLAQNSKAGASSVYENAKDYSPVK
AIDGDEDTYWTTAKGEKTGTLEIEFDEVKEFDVVSIEEYIEKGQRISEFNVEYQTSDGQW
QDFEDGHTIGAKKLLRIDPVQAKAIRINIKGSYAEPMISEVGIYKTADGFEKTQPLPEAY
TKFVPDDEGLELNKGTWDDDHAGNSGWEKQEDGSYTTTDGWANIKYTFEGTYFALVGTKG
PDYGSFDIYIDGKYTSSANASAGEITPGQILYESPTLGAGTHTIQLTTGTNRKPVNFAYG
YYLGTNENGLFEIETDSYQVTEGDSVKVKIKRNGGSKGEVTVNVTTPPGTAVQGQYYENI
TNETITFKDGEKVKYITLKTIDNLNVTGNKDFYVEIFSPTGGAQLGMRSTARVLIVENDK
RIADAVEQTSNISESWYKAESWDAFDQAYLKAKAAVDDDSMSDDEKMKLSNALMEAYNNL
EVISQYSVRNAMILPDNFEDEKVLEVELGILDSKHENIVANEYLKMVNGNDYSNGRLINK
IKDGNTITVPLNVQKAGLYNFDFTYQSTQPMSLIISGDHIAKQTISLDASETLTEKSIPL
NIQETGVSQVVITAKSLAKSDGDLAIDNAKIKLQEVSNGKIESIAIEQMPSKTVYALGDT
LDLTGLKVIAKYDTGATTDITHKVEVTGFDSSKVGEQTLTVHYGEFEAQFTVTVKGKSDE
MNPGTDTPEKPSQNNPNQGNSGQTGEKPSTTTPTVNGTTSSHDKVKTGDEQVIGVFVLAL
LGAACLFVVIKNKKSDSQD
>tr|A0A1Y4W301|A0A1Y4W301_9FIRM Uncharacterized protein OS=Massiliomicrobiota sp. An105 OX=1965540 GN=B5E48_09920 PE=4 SV=1
MNKSKILKGALAGTLAMTIVGSAVYSSNALVYDTDLEDKTVTEPESWGALPNEAQLQYHD
DELAAFIHFGVNTFTGNEWGDGTESPSVFNPTGDFGESAKSMVESLKNAGFKKVIVTAKH
HDGFCIWPSEYTEHDIENSPYKDGKGDILAEISAACTEYDMDMGLYLSPWDENAESYGYY
DKDGNPLLDENGNPIDGMTMEEVKEKDALDYNDYYVNQITEIVTNPKYGNQGKFTEWWMD
GAKGEGGDAQEYDTERILKTIKDNEPGILIFGGGTEGGIHWIGNEKGQASDTTWAKVDSV
KGDGYSEADGFTYGIPDGDHWSVPESDVSITSGWFYHDGDLPKSMSQLGNIYFQTVGNGS
PLLLNFPPKQTGDLDGSIYSRLIEFKNAIDNTFKTNLLAQNSKAGASSVYENAKEYSPAK
AIDGDEDTYWTTAKGEKTGTLEIEFDEVKEFDVVSIEEYIEKGQRISEFEVEYQTADGQW
LPFEDGHTIGAKKLLRIDPIQAKAIRINITRSYAEPMISEVGIYKTADGFEKTQPLPEAY
TKFVYGDDERLELNDGTWDGDHQGNTGWEKQEDGSYTTTDGWANIKYTFEGTYFALVGTK
GPDYGSFDIYIDGKYTSSANASAGEITPGQILYESPTLGAGTHTIQLTTGTNRKPVNFAY
GYYLGTNENGLFEIETDSYQVAEGDSIKVKIKRNGGSTGEVTVNVTTPPGTAVQGQYYEN
ITNETITFKDGEKVKYVTLKTIDNLDVTGNKDFYVEIFSPTGGAQLGMRSTARILIVEND
KRIADAVEQTSNISESWYKAESWDAFDQAYIKAKAAVDDNSMSDDEKMKLSNALMEAYNN
LEVISQYSVRNAMIMPDNFENEKTLEAELGVLDSSHENIVANEYLKMVNGSDYSNGRLIN
KIKDGNTITIPLNVQKTGLYNFDFTYQATQPMSLIISGDHIVKQTISLDASETLIEKSIP
LNIQETGISQVVITAKSLAKSDGDLAIDNAKIKLQEVSNGKIESIAIEQMPSKTVYALGD
TLDLTGLKVIAKYDTGATTDITHKVEVTGFDSSKVGEQTLTVHYGEFEAQFTVTVKGKSD
AMNPGTDTPEKPSQNNPNQGNSGQTGEKPSTTTPTVNGTTSSHDKVKTGDEQVIGVFVLA
LLGAACLFVVIKNKKSDSQD
>tr|B5CMC5|B5CMC5_9FIRM F5/8 type C domain protein OS=Ruminococcus lactaris ATCC 29176 OX=471875 GN=RUMLAC_00600 PE=4 SV=1
MKKKTLSMVMGLILGVTTVFGSIGTTAVTVSAASGEVTDADCADNNTDAPAADKVVPDAN
QYKYQKDELAAFCHFGPNTFNEVEWGEHYGDRSPADIFTLSNDFNADTLVSTLKNAGFKK
IIVTAKHHDGFCIWNSAYTDYCVKNTNYKNGEGDVLAEISAACTKYGLDMGLYLSPWDIH
EPSYGYYDANRNPTTKENDVLDYNDYYNNQLTEILSNDKYGNNGHFVEVWMDGAKGSGAN
AQEYDFTRWFNTIQKYEGKAAKYDADCMLFGAGAYTTVRWIGNEDGVAHENTWSKSNVNV
NANTIDSNGSTPYTKGYENGNKWTVPECDGRITSGWFWGTNKCTPKTISQLATMYFDSVG
HNATMLLNVPPNNQGTVDQAILDRVTEFGNNIEETFRTNLAKATGTTITASNVRGNDIDF
KPGNVVDGDDATYWTTDDGTKSGSLTIKWNTAKKFDVVSIEEAIQKGQHINSYKVEYKTS
DSANWQTLKSGVTIGAKRLVRTSPVSATQVKITVGTSDGKVPMLSEVGVYKASEGFQLAG
TAPEGMETTSVNDTSKFTFSSTGWNPQTGSSYINGQNTWSNKANAEFTYTFDGTKVYLMG
TKDPGHGSADVYIDEQLVETINTHATSRSTGTKIFESADLTDGHHTLRVVAKTSAAIGVE
AAYVINNGGVGMIELENSAYTMNEESTLDVKVKRVGGTKGTITAKIQPNPGSAIQDDFNT
ELAPTVTLNDGESEVTVQKAAETRRNTNTTGDRVFSIELTEKTPENAIIGFNSSARITIK
DADAINSEKLQTLVNQSVELKENLYSGGWDTFVAALKAAQETLANESATDATIRNAYTAL
ETAKNALVARTKYTTDDRFQFPWKTGTSATLEAEFATELTNSNDSDSDPSYPMKIAANTD
ASNGSFVTDMAYKDVLKYAYHADKTGTYHVVMRYRSGSDVNAKNGIRITEADGKITEKTL
EVDPTKENNSVVFGTVEFDIEVTEAGDGMISVTAPNTNKGPGIDYFIITPKNVAVESYDI
TATAGEGGTITAEGLADGKVSVTEGESATFTIAANDGYEVSDVKVDGTSVGKRTSYTFEN
VTAAHTIEATFAFINYTAANPFEFPTTKGTTKTLEAEHATELINSNDSDSDPSWPLSLGT
GDWASNGKFLNCMAYKDYAKYAYVATVPGTYTVTGTYRAGAANKLAFSEENGKITATQVD
CPSTSENGSLTVKTFTLTLEVTEAGAGTLILTAPDTNKAPQLDKFDIVLTKTADEADLTE
LQTAITNAEAILNAADKDKYSAAALVELQELVNAGKQLTTASSQADVDAKKAEITAKIAD
IQTQFTITATAGNGGKIAPTGATNVYKGTSKAFTITPNDGYHVDSLTVDGTAVDVVTEYT
FSDVTANHTIAVTFAKDAVTVAKENLLAAINTANEKLAQTDAYTPASLEALQNAVDEAQT
VYNKADATQTEVDNAKANVEAKIAALKEKADKSALRLAVKAAEGEAALTDKYTEESIAAL
QTAIDAANRVLADDNATQAEVDAQVEAVNAAKAALEEKKAPVVKEELEKAVADATEVVGA
TDKYTEASLAALQSAIDAANAVLQNSDATQDEIDAAVQAVKEARAALKAKDDDKKDDSNK
DDDKKDDNNGSDNNGGNNNGNANNGSNNNGSFNNGSSNNGTANGTSNVAKAAKTGDTSNV
AGMAMLCLAAGLVAVMARRRRTN
>tr|B5CXT6|B5CXT6_BACPM F5/8 type C domain protein OS=Bacteroides plebeius (strain DSM 17135 / JCM 12973 / M2) OX=484018 GN=BACPLE_01529 PE=4 SV=1
MLPPEPILPVPEPKQVEWQQMETYAFIHFGLNTFNDREWGYGDTDPKTFNPTNLDCEQWA
QTLVKAGMKGVILTAKHHDGFCLWPFEGTDYSVKNSPWKNGQGNVVKELSEACKKYGLKF
AVYLSPWDRHQANYGTPEYLPYFYAQLHDLLTNYGPVFEVWFDGANGGDGWYGGAKDIRT
IDRKNYYNYPRIYEMLDSIQPQAIIFSDGGPGCRWVGNEKGFAGATNWSFLRKGEVHPGY
DKSYELQYGHPDGNQWVPAECDVSIRPGWFYHPEEDDRVKSPDQLVDLYYRSVGHNATLL
LNFPVDRRGLIHPVDSANAVRFHEMIQQQLKTNLVAGMTPKVSNERGGDFVASALTDDNF
DTYWATEDGVTTADIEFSFDTPTRMNRMMLQEYIPLGQRVKAFVVEYLDKDTWLPVKLNE
ETTTIGYKRLLRFETVETKGIRIRITDARGPLCLSSVGVYDAGNVSDSFVEKVEDIESLP
YLLPDVKTDEAAKASDKQAQTTCFVEGDRLLIELQEERLVSSLHFLPDQGEPNKGLIANY
EIRVGVSKDAVNQLVKSGEFSNIQNNPVMQSVFFTPVKARYIELKATRMIRAGEPMGFAE
LGVK
>tr|A0A1Q6GIH9|A0A1Q6GIH9_9BACE Glycoside hydrolase family 29 OS=Bacteroides plebeius OX=310297 GN=BHV76_04815 PE=4 SV=1
MKKSIHFLSIPVVACCLSCTSGKVLPPDPILPIPEPKQVEWQQMETYAFIHFGLNTFNDR
EWGYGDTDPKTFNPTNLDCEQWAQTLVKAGMKGVILTAKHHDGFCLWPFEGTDYSVKNSP
WKNGQGNVVKELSEACKKYGLKFAVYLSPWDRHQANYGTPEYLPYFYAQLHDLLTNYGPV
FEVWFDGANGGDGWYGGAKEIRTIDRKNYYNYPRIYEMLDSIQPQAIIFSDGGPGCRWVG
NEKGFAGATNWSFLREGEVHPGYEKSYELQYGHADGNQWVPAECDVSIRPGWFYHPEEDD
RVKSPDQLVDLYYRSVGHNATLLLNFPVDRRGLIHPVDSANAVRFHEMIQQQLKTNLVAG
MTPKVSNERGGDFVASALTDDNFDTYWATEDGVTTADIEFSFDTPTRMNRMMLQEYIPLG
QRVKAFVVEYLDKDTWLPVKLNEETTTIGYKRLLRFETVETKGIRIRITDARGPLCLSNV
GVYDAGNVSDSFVEKVEDIESVPYLLPDVKAEESAKASDKQSQTTCFVEGDRLLIDLQEE
RMVSSLHFLPDQGEPNKGLIANYEIRVGTSKEAVNQLVKSGEFSNIQNNPVMQSVFFTPV
KARYIELKATRMIRAGEPMGFAELGVK
>tr|A0A3C0E1M1|A0A3C0E1M1_9BACE Glycoside hydrolase family 29 OS=Bacteroides sp. OX=29523 GN=DCM29_00320 PE=4 SV=1
MLPPEPILPVPEPKQVEWQQMETYAFIHFGLNTFNDREWGYGDTDPKTFNPTNLDCEQWA
QTLVKAGMKGVILTAKHHDGFCLWPFEGTDYSVKNSPWKNGQGNVVKELSEACKKYGLKF
AVYLSPWDRHQANYGTPEYLPYFYAQLHDLLTNYGPVFEVWFDGANGGDGWYGGAKDIRT
IDRKNYYNYPRIYEMLDSIQPQAIIFSDGGPGCRWVGNEKGFAGATNWSFLRKGEVHPGY
DKSYELQYGHPDGNQWVPAECDVSIRPGWFYHPEEDDRVKSPDQLVDLYYRSVGHNATLL
LNFPVDRRGLIHPVDSANAVRFHEMIQQQLKTNLVAGMTPKVSNERGGDFVASALTDDNF
DTYWATEDGITTADIEFSFDTPTRMNRMMLQEYIPLGQRVKAFVVEYLDKDTWLPVKLNE
ETTTIGYKRLLRFETVETKGIRIRITDARGPLCLSSVGVYDAGNVSDSFVEKVEDIESLP
YLLPDVKADEAAKASDKQAQTTCFVEGDRLLIELQEERLVSSLHFLPDQGEPNKGLIANY
EIRVGVSKDAVNQLVKSGEFSNIQNNPVMQSVFFTPVKARYIELKATRMIRAGEPMGFAE
LGVK
>tr|A0A3E4MX30|A0A3E4MX30_9BACE Glycoside hydrolase family 29 OS=Bacteroides plebeius OX=310297 GN=DWZ34_12435 PE=4 SV=1
MLPPEPILPVPEPKQVEWQQMETYAFIHFGLNTFNDREWGYGDTDPKTFNPTNLDCEQWA
QTLVKAGMKGVILTAKHHDGFCLWPFEGTDYSVKNSPWKNGQGNVVKELSEACKKYGLKF
AVYLSPWDRHQANYGTPEYLPYFYAQLHDLLTNYGPVFEVWFDGANGGDGWYGGAKDIRT
IDRKNYYNYPRIYEMLDSIQPQAIIFSDGGPGCRWVGNEKGFAGATNWSFLRKGEVHPGY
DKSYELQYGHPDGNQWVPAECDVSIRPGWFYHPEEDDRVKSPDQLVDLYYRSVGHNATLL
LNFPVDRRGLIHPVDSANAVRFHEMIQQQLKTNLVAGMTPKVSNERGGDFVASALTDDNF
DTYWATEDGVTTADIEFSFDTPTRMNRMMLQEYIPLGQRVKAFVVEYLDKDTWLPVKLNE
ETTTIGYKRLLRFETVETKGIRIRITDARGPLCLSNVGVYDAGNVSDSFVEKVEDIESVP
YLLPDVKAEETAKASDKQAQTTCFVEGDRLLIDLQEERLVSSLHFLPDQGEPNKGLIANY
EIRVGTSKDAVNQLVKSGEFSNIQNNPVMQSVFFTPVKARYIELKATRMIRAGEPMGFAE
LRVK
>tr|A0A3E4Z4S3|A0A3E4Z4S3_9BACE Glycoside hydrolase family 29 OS=Bacteroides plebeius OX=310297 GN=DXB87_15030 PE=4 SV=1
MLPPEPILPVPEPKQVEWQQMETYAFIHFGLNTFNDREWGYGDTDPKTFNPTNLDCEQWA
QTLVKAGMKGVILTAKHHDGFCLWPFEGTDYSVKNSPWKNGQGNVVKELSEACKKYGLKF
AVYLSPWDRHQANYGTPEYLPYFYAQLRDLLTNYGPVFEVWFDGANGGDGWYGGAKDIRT
IDRKNYYNYPRIYEMLDSIQPQAIIFSDGGPGCRWVGNEKGFAGATNWSFLRKGEVHPGY
DKNYELQYGHPDGNQWVPAECDVSIRPGWFYHPEEDDRVKSPDQLVDLYYRSVGHNATLL
LNFPVDRRGLIHPVDSANAVRFHEMIQQQLKTNLVAGMTPKVSNERGGDFVASALTDDNF
DTYWATEDGVTTADIEFSFDTPTRMNRMMLQEYIPLGQRVKAFVVEYLDKDTWLPVKLNE
ETTTIGYKRLLRFETVETKGIRIRITDARGPLCLSSVGVYDAGNVSDSFVEKVEDIESLP
YLLPDVKADEAAKASDKQAQTTCFVEGDRLLIELQEERLVSSLHFLPDQGEPNKGLIANY
EIRVGVSKGAVNQLVKSGEFSNIQNNPVMQSVFFTPVKARYIELKATRMIRAGEPMGFAE
LGVK
>tr|A0A412H651|A0A412H651_9BACE Glycoside hydrolase family 29 OS=Bacteroides plebeius OX=310297 GN=DWY14_07885 PE=4 SV=1
MLPPEPILPVPEPKQVEWQQMETYAFIHFGLNTFNDREWGYGDTDPKTFNPTNLDCEQWA
QTLVKAGMKGVILTAKHHDGFCLWPFEGTDYSVKNSPWKNGQGNVVKELSEACKKYGLKF
AVYLSPWDRHQANYGTPEYLPYFYAQLHDLLTNYGPVFEVWFDGANGGDGWYGGAKDIRT
IDRKNYYNYPRIYEMLDSIQPQAIIFSDGGPGCRWVGNEKGFAGATNWSFLRKGEVHPGY
DKSYELQYGHPDGNQWVPAECDVSIRPGWFYHPEEDDRVKSPDQLVDLYYRSVGHNATLL
LNFPVDRRGLIHPVDSANAVRFHEMIQQQLKTNLVAGMTPKVSNERGGDFVASALTDDNF
DTYWATEDGVTTADIEFSFDTPTRMNRMMLQEYIPLGQRVKAFVVEYLDKDTWLPVKLNE
ETTTIGYKRLLRFETVETKGIRIRITDARGPLCLSNVGVYDAGNVSDSFVEKVEDIESVP
YLLPDVKAEETAKASDKQAQTTCFVEGDRLLIDLQEERLVSSLHFLPDQGEPNKGLIANY
EIRVGTSKDAVNQLVKSGEFSNIQNNPVMQSVFFTPVKARYIELKATRMIRTGEPMGFAE
LRVK
>tr|A0A414FPJ6|A0A414FPJ6_9BACE Glycoside hydrolase family 29 OS=Bacteroides plebeius OX=310297 GN=DW789_12005 PE=4 SV=1
MLPPEPILPVPEPKQVEWQQMETYAFIHFGLNTFNDREWGYGDTDPKTFNPTNLDCEQWA
QTLVKAGMKGVILTAKHHDGFCLWPFEGTDYSVKNSPWKNGQGNVVKELSEACKKYGLKF
AVYLSPWDRHQANYGTPEYLPYFYAQLRDLLTNYGPVFEVWFDGANGGDGWYGGAKDIRT
IDRKNYYNYPRIYEMLDSIQPQAIIFSDGGPGCRWVGNEKGFAGATNWSFLRKGEVHPGY
DKNYELQYGHPDGNQWVPAECDVSIRPGWFYHPEEDDRVKSPDQLVDLYYRSVGHNATLL
LNFPVDRRGLIHPVDSANAVRFHEMIQQQLKTNLVAGMTPKVSNERGGDFVASALTDDNF
DTYWATEDGVTTADIEFSFDTPTRMNRMMLQEYIPLGQRVKAFVVEYLDKDTWLPVKLNE
ETTTIGYKRLLRFETVETKGIRIRITDARGPLCLSSVGVYDAGNVSDSFVEKVEDIESLP
YLLPDVKADEAAKASDKQAQTTCFVEGDRLLIELQEERLVSSLHFLPDQGEPNKGLIANY
EIRVGVSKDAVNQLVKSGEFSNIQNNPVMQSVFFTPVKARYIELKATRMIRAGEPMGFAE
LGVK
>tr|A0A414R7S3|A0A414R7S3_9BACE Glycoside hydrolase family 29 OS=Bacteroides plebeius OX=310297 GN=DW653_11615 PE=4 SV=1
MLPPEPILPVPEPKQVEWQQMETYAFIHFGLNTFNDREWGYGDTDPKTFNPTNLDCEQWA
QTLVKAGMKGVILTAKHHDGFCLWPFEGTDYSVKNSPWKNGQGNVVKELSEACKKYGLKF
AVYLSPWDRHQANYGTPEYLPYFYAQLHDLLTNYGPVFEVWFDGANGGDGWYGGAKDIRT
IDRKNYYNYPRIYEMLDSIQPQAIIFSDGGPGCRWVGNEKGFAGATNWSFLRKGEVHPGY
DKSYELQYGHPDGNQWVPAECDVSIRPGWFYHPEEDDRVKSPDQLVDLYYRSVGHNATLL
LNFPVDRRGLIHPVDSANAVRFHEMIQQQLKTNLVAGMTPKVSNERGGDFVASALTDDNF
DTYWATEDGVTTADIEFSFDTPTRMNRMMLQEYIPLGQRVKAFVVEYLDKDTWLPVKLNE
ETTTIGYKRLLRFETVETKGMRIRITDARGPLCLSNVGVYDAGNVSDSFVEKVEDIESVP
YLLPDVKAEESAKASDKQSQTTCFVEGDRLLIDLQEERMVSSLHFLPDQGEPNKGLIANY
EIRVGTSKEAVNQLVKAGEFSNIQNNPVMQSVFFTPVKARYIELKATRMIRAGEPMGFAE
LGVK
>tr|A0A415JGQ2|A0A415JGQ2_9BACE Glycoside hydrolase family 29 OS=Bacteroides plebeius OX=310297 GN=DW035_00725 PE=4 SV=1
MLPPEPILPVPEPKQVEWQQMETYAFIHFGLNTFNDREWGYGDTDPKTFNPTNLDCEQWA
QTLVKAGMKGVILTAKHHDGFCLWPFEGTDYSVKNSPWKNGQGNVVKELSEACKKYGLKF
AVYLSPWDRHQANYGTPEYLPYFYAQLRDLLTNYGPVFEVWFDGANGGDGWYGGAKDIRT
IDRKNYYNYPRIYEMLDSIQPQAIIFSDGGPGCRWVGNEKGFAGATNWSFLRKGEVHPGY
DKNYELQYGHPDGNQWVPAECDVSIRPGWFYHPEEDDRVKSPDQLVDLYYRSVGHNATLL
LNFPVDRRGLIHPVDSANAVRFHEMIQQQLKTNLVAGMTPKVSNERGGDFVASALTDDNF
DTYWATEDGVTTADIEFSFDTPARMNRMMLQEYIPLGQRVKAFVVEYLDKDTWLPVKLNE
ETTTIGYKRLLRFETVETKGIRIRITDARGPLCLSSVGVYDAGNVSDSFVEKVEDIESLP
YLLPDVKADEAAKASDKQAQTTCFVEGDRLLIELQEERLVSSLHFLPDQGEPNKGLIANY
EIRVGVSKDAVNQLVKSGEFSNIQNNPVMQSVFFTPVKARYIELKATRMIRAGEPMGFAE
LGVK
>tr|R5VCR6|R5VCR6_9BACE Uncharacterized protein OS=Bacteroides plebeius CAG:211 OX=1263052 GN=BN536_00726 PE=4 SV=1
MRKSIHLLSIPVVACCLSCTSGKVLPPEPILPVPEPKQVEWQQMETYAFIHFGLNTFNDR
EWGYGDTDPKTFNPTNLDCEQWAQTLVKAGMKGVILTAKHHDGFCLWPFEGTDYSVKNSP
WKNGQGNVVKELSEACKKYGLKFAVYLSPWDRHQANYGTPEYLPYFYAQLHDLLTNYGPV
FEVWFDGANGGDGWYGGAKDIRTIDRKNYYNYPRIYEMLDSIQPQAIIFSDGGPGCRWVG
NEKGFAGATNWSFLRKGEVHPGYDKSYELQYGHPDGNQWVPAECDVSIRPGWFYHPEEDD
RVKSPDQLVDLYYRSVGHNATLLLNFPVDRRGLIHPVDSANAVRFHEMIQQQLKTNLVAG
MTPKVSNERGGDFVASALTDDNFDTYWATEDGVTTADIEFSFDTPTRMNRMMLQEYIPLG
QRVKAFVVEYLDKDTWLPVKLNEETTTIGYKRLLRFETVETKGIRIRITDARGPLCLSNV
GVYDAGNVSDSFVEKVEDIESVPYLLPDVKAEEAAMASDKQSQTTCFVEGDRLLIDLQEE
RMVSSLHFLPDQGEPNKGLIANYEIRVGTSKEAVNQLVKAGEFSNIQNNPVMQSVFFTPV
KARYIELKATRMIHAGEPMGFAELGVK
>tr|A0A1Y5KBM5|A0A1Y5KBM5_9BACL Alpha-L-fucosidase OS=Paenibacillus sp. MY03 OX=302980 GN=B1748_23275 PE=4 SV=1
MGNETQGITLRHELALPTNAQREWQDMELGLFCHFGINTFCDQEWGEGKDSPALFNPDKL
DARQWVRTAREAGFRYFILTAKHHDGFCLWPTATTDYSVASSPWKNGQGDVVAECAAACR
EEGIGFGIYVSPWDRHEPSYADPALYDEFYARQLEELLTGYGPLVEVWFDGAGSEGREYD
WPRIMGLVKKYQPQAMVFNMGAPTIRWVGNEDGLAPYPCWNTAESARASMFTHSTSHWLP
ETPRWVPAECDVPIRKDRWFWHPGEEHLLLSLDDLMDIYYRSVGHGATLLLNAAPDDRGL
LPEVDAARLIEFGNEIRRRFGSSVAETAGAEEAAAEAAESAGFADDAAYTTVLPLPMGAV
IDHAVLMEDIAYGERVRKYALEAFADGVWKVLHEGSAIGHKKIEAFPPVVAEKLRLRITE
AAAEPVIRRMAAYRCL
>tr|A0A2R5EWH5|A0A2R5EWH5_9BACL Alpha-L-fucosidase OS=Paenibacillus agaridevorans OX=171404 GN=PAT3040_05788 PE=4 SV=1
MMGNETQGITLRHELALPTNAQREWQDMELGLFCHFGINTFCDQEWGEGKDSPALFNPDK
LDARQWVRTAREAGFRYFILTAKHHDGFCLWPTATTDYSVASSPWKNGQGDVVAECAAAC
REEGIGFGIYVSPWDRHEPSYADPALYDDFYARQLEELLTGYGPLVEVWFDGAGSEGREY
DWPRIMGLVKKYQPQAMVFNMGAPTIRWVGNEDGLAPYPCWNTAESARASMFTNSTSHWL
PETPRWVPAECDVPIRKDRWFWHPGEEHLLLSLDDLMDIYYRSVGHGATLLLNAAPDDRG
LLPEVDAARLIEFGNEIRRRFGSSVAETAGVEEAAAEAAESAGFADDAAYTTVLPLPMGA
VIDHAVLMEDIAYGERVRKYALEAFADGAWKVLHEGSAIGHKKIEAFPPVVAEKLRLRIT
EAAAEPVIRRMAAYRCL
>tr|A0A1Y5KFN6|A0A1Y5KFN6_9BACL Alpha-L-fucosidase OS=Paenibacillus sp. MY03 OX=302980 GN=B1748_14710 PE=4 SV=1
MTTELAKPTPAQLRWQDLELGLFCHFGINTFYDQEWGHGTEDPKRFHPTEFDATQWVKAA
KDAGFRYLILTAKHHDGFCLWPTATTDHSVKASPWRDGGGDVVREVADACAEAGILFGIY
LSPWDRHASCYPDKEAYDEFYCRQLTELLTGYGPLVEVWFDGAGSEGREYDWGRIMSLVT
EHQPEAMVFNLGRPTIRWVGNEDGVAPYPCWNTAETAKVSMFTKDMLTWLPDTPGWVPAE
CDVPIRELHWFWHPDDEHSLKSLDRLIDIYYRSVGHGTNLLLNISPDDRGLLPDPDVKRL
LELSGEMRRRFSNPIGETSGTGETVSQEWQQAETFDHVVIMEEIAEGERIREYTLEARVD
GKWVRLATGSAIGHKKIDRVGPVHADGLRLRVLSSVGTPLIRRLSCYATGSDR
>tr|A0A2R5EUV7|A0A2R5EUV7_9BACL Alpha-L-fucosidase OS=Paenibacillus agaridevorans OX=171404 GN=PAT3040_02128 PE=4 SV=1
MTTELAKPTPAQLRWQDLELGLFCHFGINTFYDQEWGHGTEDPKRFHPTAFDATQWVKAA
KDAGFRYLILTAKHHDGFCLWPTATTDHSVKASPWKDGRGDVVREVADACAEAGILFGIY
LSPWDRHASCYPDKEAYDEFYCRQLTELLTGYGPLVEVWFDGAGSEGREYDWGRIMSLVT
KHQPEAMVFNLGRPTIRWVGNEDGVAPYPCWNTAETAKVSMFTKDMLTWLPDTPGWVPAE
CDVPIRELHWFWHPDDEHSLKSLDRLIDIYYRSVGHGTNLLLNISPDDRGLLPDPDVKRL
LELSGEMRRRFSNPIGETSGTGETVSLEWKQAETFDHVVIMEEIAEGERIREYTLEARVD
GKWVRLATGSAIGHKKIDRVGPVHADGLRLRVMSSVGTPLIRRLGCYATGSGR
>tr|B5I1P8|B5I1P8_9ACTN Alpha-1,3/4-fucosidase OS=Streptomyces sviceus ATCC 29083 OX=463191 GN=SSEG_05583 PE=4 SV=1
MTVSRRLFVTAAAGLAVTGIPGPAVALDDDRSYRIPVSPGDTETDLVRKASQVRPTARQI
AWQRLERTAFLHFGVNTFTGLEWGNGDEDPDVFQPAGLDTDQWAAALKDGGFKLAILTVK
HHDGFVLYPSRYTGHSVASSSWRDGRGDVLRSFADSMRRYGLKVGVYLSPADENQYLHGV
YANGSARSPRTIPTLVAGDDRTPDRFHTLDATDYGAHMLNTLYEVLTEYGPVDEVWFDGA
QGHIPPDKVESYDWDSWYTLVRTLAPDAAIAVTGPDLRWVGNESGIAREDEWSVVPVKEN
QYGRTDWALSYDTPDEGSRAALVKARPATDYLQWWPAECDVSLRDGWFYHADQQPKSVDY
LTEIFFGSVGRNAVLLLNVPPDTDGLLHDTDVVRLREFRERIDRELPHDLAQSAHRTTAP
GRVTLDLGREQEVDRIRLAEDIRHGQQVENFVVEGFRDGAWTELTAAGTIGASRILLLPA
PVRARKWRLRVTRSRGAVRVAEFGLYRSRT
>tr|A0A3N4T452|A0A3N4T452_9ACTN Alpha-L-fucosidase OS=Streptomyces sp. W SAI-097 OX=2485146 GN=EDC86_8169 PE=4 SV=1
MTVSRRLFVTAAAGLAVTGIPGPAVALDDDRFYRIPVSPDDTETELVRKASQVRPTARQI
AWQSLGRTAFLHFGVNTFTGLEWGTGDEDPDVFQPTGLDTDQWAAALKDGGFELAILTVK
HHDGFVLYPSRYTDHSVASSSWRDGRGDVLRSFADSMRRYGLKVGVYISPADENQYLHGV
YANGSARSDRTVPTLVDGDDRTPDRFLTLPATDYGAHMLNTLYEVLTEYGRVDEVWFDGA
QGHIPPEKVESYDWDSWYTLVRALAPDAAIAVTGPDLRWVGNESGLAREDEWSVIPVKEN
QYGRTDWALSYDTPDEGSRAALVTAQPATDYLQWWPAECDVSIRDGWFYHADQQPKSVDY
LTEIFFGSVGRNAVLLLNVPPDTDGLLHGTDVVRLREFRERIERELPRDLAQGARRTTAA
GRVTLDLGREQEVDRVRLAEDIRHGQQVESFVVEALRDGAWTQVASAGTIGASRILVLPA
PVRARSWRLRVTRARSAVRIAEFGLYRSLT
>tr|A0A1Y5KJB8|A0A1Y5KJB8_9BACL Uncharacterized protein OS=Paenibacillus sp. MY03 OX=302980 GN=B1748_14700 PE=4 SV=1
MLIKTKIGKSLYLLLAVALLLSPFGVAAANPAAAQGAEAAKGDSEEDANRYGGGGRSGTT
YYVDSSRGNDTKSGKSKGSAWRTLDKVNATTFQPGDKVLLKAGSTWTGQLWPKGSGSNGR
PIVIDKYGSGPKPVIHGAGLYQETVKLFNQQYWEINNLELTNTGEARDTRRAVWIEAQDI
GTANHIYLKNLDIHDVNGQTEVQDLESGGIIVRVTGSATPTKFHDLLIEDNTFVDVDSTG
IYVRSNWRNRDTRTDGVGPWLGFTEVVIRGNSLNRTGGDAIIVCESEGALIEYNVAANSY
YDSVGYHAAIWAINSDNALFQYNEAYMTRTTMDGMGFDIDELCNNCVMQHNYSHDNEGGF
MLLVGRRGGDGTGYDKNGIVRYNISENDDHAIVQAVGRMDNYQVYNNTFYTSEDMKVQFL
KAPDGNNMPQGTMSFKNNIIYNLGTDMTYYCGNATCTFDSNTFYGNHDPSEPDDPNKLTS
DPLLIGAGSGGTGRSTVDGYRLGEGSPSLGSGTVIADNGGKDYWGNAVSSTQSPNRGAYN
GKGVKNERIGSGINSYLFSKEGKEVRMLSSSMPQEVAIRVNGKLIVKDADGEAKSYSPDN
AGYVYLTLSEMALELTGKVKEIKPSGKYALQASSAYLGDSIRLKLTVDNTGKPRSAINAR
LLIAGQEIPVKVASGKTAVIDMTVPASEAAGSLRLVGEIVSHGKAIARIAANVEVLEPLQ
MEVKHALNENREALRVRIRNVSDTNRVLNGLLWTIGGQDGVEALQASVPAGGDYVALLPL
DAYRPSSSHPVKITLEAAGGVSLAYEGQVTLATLLANKSIAIDGDRDDLADLPVIQLAEE
GAVQIPGYGGAADVSGSVWVTWDEDYLNIAAAIRDNVHSQEQSEGQIWLGDSIQFALSPG
MPGDQTSMYEFGMALTPDGPQLYRWSAIEGEAGLMADPALAVARDEARQETYYELSLPWT
ELSPILPDDGKFGLSLLVNDNDGHGRKGWIEWGGGIGGIKDPSQFKLMRLIGQVDRVLES
LSINEPLAYSALPVTLTATGTFDDGFVSRITHAEWSSSNSDIAAVSNGTVTFTGEKGPVT
ITASYRGKEASVSAVIEDLGQYYAFDEGEGMTTKDSASGISYAIEGEPVWVDGKVGKALL
FYGNSVKISPIAKDDFTFMAWIKPETDLHNHTILGQGITGSQANMFNWWITNGQLYFLVS
DAEGAGHGMWPFNTEPGSIPLGEWTHVAVAREGNTFQMYLNGENVLTKTVPHHQNQLTNP
NPFRIGAQNNGEGGPSEGFHGAIDELRLYPEALSADRIRELSGIETEGKPAIKEVETLMA
VSNVAYGKTALVSSSRDGNVGSRAFDESAGTKWESEASDPQWLIADLGKPHRINRTKLTW
GSGGAGRAFKIQVSNDMIQWTDVYSTTTGNGSVVDVSFQDTDVRFVRVYGTKRNGTGGYG
VQEFEVYGEEIPYQPPAVPPVLPHLPIPTEPQIAYQKMETIAFAHFGMNTFTDREWGTGT
ESPSLFNPTDFDARQWVSALKDAGFKLLILTAKHHDGFALWPSAYTTHDVASSPWKNGQG
DVVKEVSDACMEFGIKFGLYVSPWDMHEPTYGSGLAYNDFFVNQLTELMTNYGEISEIWF
DGAKGDNTPQDYDTERWYSVIKQLQPNIVIWGAPGDARYIGNEDGIASETNWAKVVPQQP
GNPYWTPNQYGEGNPNGTAWQSGEADVPLRPGWFYHDWEDTHIKTLPELVDIYQKSVGRG
ANLLLNVSPDKRGKLVNSDINRLMELRNWIDQAYGVNLAAGSSASASNVRGNASAYAAGK
LTDGQYDSYWATDDQVTSAHVDLNLGATKTFNAVTLQEYIPLGQRISGFNVQVRIGGSWT
TVATGTTIGYKRIVTFDEVESDQVRINILSSQASPLLNFAGVYDIGELGAGGGSQDADRE
QYFDFDEGQGSTATESVSGQAMSIEGGYSWVPGKVGQALRFNGSDTSIVTDSIVKDNFTF
AAWIKPESDGANRIILGQGITGSQTNMFNWWIANGKLEFLMADALGQGHSLWPFATASSS
IPLNEWTHVAVSKAGSQFKLYIDGQLALTKSASSDIVQTNNPNPFRIGGQNAASQGAAEV
FHGAIDELRMYPRTLTDQEVFALSQAGGQPPQVINVALIGDSITTGSYPAQLQTLLGPNY
YINPYGSGGTTMLKNGDQPYWDSWEFVNSSNWEPDIVVIMLGTNDSTAINWQHSSEFVSD
YEDMIDHYRGLASQPTVYVATSPHNYWPGNVVTSEVVPLQIQAAANKGSTVIHVNPGTQN
MGHNFPDNVHPNDAGSTTIATAIYNALKGTGKPSLSSAFSKIEAEHYSSKSGSVQAEPSS
EGSDNLGFIGTGDYTVYEDVNFGLGAASVDARIAGSTVGKIEIRLGSPTGTLIGTVNGVN
TGSYQTYTTAQAALSSVSGVHDVYLVYTAGLNLNWFQFKQ
>tr|B6FVE0|B6FVE0_9FIRM F5/8 type C domain protein OS=Tyzzerella nexilis DSM 1787 OX=500632 GN=CLONEX_04129 PE=4 SV=1
MKKKKIVSLLMAALMIGQFLPSETMTAFAGESALVGKEQLADRHTVAPKKDSVVPNANQY
EYQKQELAAFCHFGPNTFNEIEWGEKYGDKKPDEIFKLEEDFDADTFVEAIKEAGFEKLI
VTAKHHDGFCIWNSKHTEYDVESTSYASKNYNGLGGDVLAEISAACTKYDVDMGLYLSPW
DIHDDSYGYKDKDGKALVRLVNGKSEPIEGLTWADVKERDAKDYNEYYNNQLEEILGNQK
YGNNGHFKEVWMDGAKGSGAGYQEYEFQKWFATIQKHEGKEAGFDSDCMLFGAEAYTTVR
WIGNELGYANEETWSKSKVNYDNNTIDSKKVGAYTVGYEDGNQWTVPESDARITSGWFWG
TTKNTPKSVEDLAGMYFNSVGHNSPLLLNIPPNTQGKIDEAILQRVKEFGQNIKETFKSN
LAAHGTAKATEVRGNDVAYSPENVLDGKDDTYWTVNDNTTTGQLVVDLGGTKSFDVVSIE
EAIQFGQRIKQFKVEYSNEGSDWKVFDQGTTIGAKRLCREGVVKADKIRITVTTSKEVPM
ISEVGVYKATSDFESPSAAPEGMQVIDERDEAFTFSNGWTKEDGSQYLNGTNVWAKKGAS
FEMKFKGSKVYLIGTLDSGHGKATVTVDGKAVEINTNASKRAVGQIIFTSDDLEDGEHTL
KLEVTNNDNKAIGIEGAYVINNGGLGMVGIEKAEYTMKEDSEMKMKLVRVGGSKGEATVT
VAPNPGTAIQDDFDTEGTATVTFADGEKEKDVVVITRRNTKDTGDQYFTEELSTKNEGLI
LGFTSKAKITILDQERQPEDVTAEKLPKDVYKTVTATSEEKTAEHKQGIENAFDENLDTF
WHAQWGDAGKLKNHPNGISVEMTLKEAKEIAKLTYIPKAGDTGTVGNYIIEAATGTDDAG
KTVWKEVCSGTFKNQGNSTAAQDAVFKEVIKTDKIRLTAKTMAGGEHPTAREIALYEKAE
PIMITVTTKAGENGMITPVTGKLDENGTMKVQAGKLKTFAIKANAGYSIKDVLVNGKSVG
AVSRYTVESDTDVTIEAVFKACEHEKTEIQGAKEPTCTEDGATGKVVCLQCGVTVKESTV
IPALGHKFGQWEVVKEATDKEEGLERRACVACGFEEERTVAKLPTAVDKSKLQKYYDECI
GYYKQEGYTKESWTVYEGALKNAKAMLDKESATQEEVDAAIHQLADAADKLVEKTSVTQK
PENNNTSGGNNSNTSSGNKPVTGDSATPIVLLAAVLASVFAVIRQMKKKIR
>tr|A0A3D5RBP5|A0A3D5RBP5_CLOSP Uncharacterized protein OS=Clostridium sp. OX=1506 GN=DHU67_02010 PE=4 SV=1
MKKKKIVSLLMAALMIGQFLPSETMTAFAGESALVGKEQLADRHTVAPKKDSVVPNANQY
EYQKQELAAFCHFGPNTFNEIEWGEKYGDKKPDEIFKLEEDFDADTFVEAIKEAGFEKLI
VTAKHHDGFCIWNSKHTEYDVESTSYASKNYNGLGGDVLAEISAACTKYDVDMGLYLSPW
DIHDDSYGYKDKDGKALVRLVNGKSEPIEGLTWADVKERDAKDYNEYYNNQLEEILGNQK
YGNNGHFKEVWMDGAKGSGAGYQEYEFQKWFATIQKHEGKEAGFDSDCMLFGAEAYTTVR
WIGNELGYANEETWSKSKVNYDNNTIDSKKVGAYTVGYEDGNQWTVPESDARITSGWFWG
TTKNTPKSVEDLAGMYFNSVGHNSPLLLNIPPNTQGKIDEAILQRVKEFGQNIKETFKSN
LAAHGTAKATEVRGNDVAYSPENVLDGKDDTYWTVNDNTTTGQLVVDLGGTKSFDVVSIE
EAIQFGQRIKQFKVEYSNEGSDWKVFDQGTTIGAKRLCREGVVKADKIRITVTTSKEVPM
ISEVGVYKATSDFESPSAAPEGMQVIDERDEAFTFSNGWTKEDGSQYLNGTNVWAKKGAS
FEMKFKGSKVYLIGTLDSGHGKATVTVDGKAVEINTNASKRAVGQIIFTSDDLEDGEHTL
KLEVTNNDNKAIGIEGAYVINNGGLGMVGIEKAEYTMKEDSEMKMKLVRVGGSKGEATVT
VAPNPGTAIQDDFDTEGTATVTFADGEKEKDVVVITRRNTKDTGDQYFTEELSTKNEGLI
LGFTSKAKITILDQERQPEDVTAEKLPKDVYKTVTATSEEKTAEHKQGIENAFDENLDTF
WHAQWGDAGKLKNHPNGISVEMTLKEAKEIAKLTYIPKAGDTGTVGNYIIEAATGTDDAG
KTVWKEVCSGTFKNQGNSTAAQDAVFKEVIKTDKIRLTAKTMAGGEHPTAREIALYEKAE
PIMITVTTKAGENGMITPVTGKLDENGTMKVQAGKLKTFAIKANAGYSIKDVLVNGKSVG
AVSRYTVESDTDVTIEAVFKACEHEKTEIQGAKEPTCTEDGATGKVVCLQCGVTVKESTV
IPALGHKFGQWEVVKEATDKEEGLERRACVACGFEEERTVAKLPTAVDKSKLQKYYDECI
GYYKQEGYTKESWTVYEGALKNAKAMLDKESATQEEVDAAIHQLADAADKLVEKTSVTQK
PENNNTSGGNNSNTSSGNKPVTGDSATPIVLLAAVLASVFAVIRQMKKKIR
>tr|A0A413JB59|A0A413JB59_9FIRM Uncharacterized protein OS=Tyzzerella nexilis OX=29361 GN=DXA47_01650 PE=4 SV=1
MKKKKIVSLLMAALMIGQFLPSETMTAFAGESALVGKEQLADRHTVAPKKDSVVPNANQY
EYQKQELAAFCHFGPNTFNEIEWGEKYGDKKPDEIFKLEEDFDADTFVEAIKEAGFEKLI
VTAKHHDGFCIWNSKHTEYDVESTSYASKNYNGLGGDVLAEISAACTKYDVDMGLYLSPW
DIHDDSYGYKDKDGKALVRLVNGKSEPIEGLTWADVKERDAKDYNEYYNNQLEEILGNQK
YGNNGHFKEVWMDGAKGSGAGYQEYEFQKWFATIQKHEGKEAGFDSDCMLFGAEAYTTVR
WIGNELGYANEETWSKSKVNYDNNTIDSKKVGAYTVGYEDGNQWTVPESDARITSGWFWG
TTKNTPKSVEDLAGMYFNSVGHNSPLLLNIPPNTQGKIDEAILQRVKEFGQNIKETFKSN
LAAHGTAKATEVRGNDVAYSPENVLDGKDDTYWTVNDNTTTGQLVVDLGGTKSFDVVSIE
EAIQFGQRIKQFKVEYSNEGSDWKVFDQGTTIGAKRLCREGVVKADKIRITVTTSKEVPM
ISEVGVYKATSDFESPSAAPEGMQVIDERDEAFTFSNGWTKEDGSQYLNGTNVWAKKGAS
FEMKFKGSKVYLIGTLDSGHGKATVTVDGKAVEINTNASKRAVGQIIFTSDDLEDGEHTL
KLEVTNNDNKAIGIEGAYVINNGGLGMVGIEKAEYTMKEDSEMKMKLVRVGGSKGEATVT
VAPNPGTAIQDDFDTEGTATVTFADGEKEKDVVVITRRNTKDTGDQYFTEELSTKNEGLI
LGFTSKAKITILDQERQPEDVTAEKLPKDVYKTVTATSEEKTAEHKQGIENAFDENLDTF
WHAQWGDAGKLKNHPNGISVEMTLKEAKEIAKLTYIPKAGDTGTVGNYIIEAATGTDDAG
KTVWKEVCSGTFKNQGNSTAAQDAVFKEVIKTDKIRLTAKTMAGGEHPTAREIALYEKAE
PIMITVTTKAGENGMITPVTGKLDENGTMKVQAGKLKTFAIKANAGYSIKDVLVNGKSVG
AVSRYTVESDTDVTIEAVFKACEHEKTEIQGAKEPTCTEDGATGKVVCLQCGVTVKESTV
IPALGHKFGQWEVVKEATDKEEGLERRACVACGFEEERTVAKLPTAVDKSKLQKYYDECI
GYYKQEGYTKESWTVYEGALKNAKAMLDKESATQEEVDAAIHQLADAADKLVEKTSVTQK
PENNNTSGGNNSNTSSGNKPVTGDSATPIVLLAAVLASVFAVIRQMKKKIR
>tr|B6GDD1|B6GDD1_9ACTN LPXTG-motif cell wall anchor domain protein OS=Collinsella stercoris DSM 13279 OX=445975 GN=COLSTE_02109 PE=4 SV=1
MRMEKHLRITPRWTAALVLGAALSFTPAVTFAETGFVGDSALTTGDVADPAKDSVVPNAG
QYRYAKEELAAFCHFGPNTFSGVEWGTDYGTKMKSATEFMNQLTSMDVDGYVRSIKDAGF
KRLIVTAKHHDGFCIWNSPSTEYDMGSTTSKIDVLEELSKACTKHGLDMGLYLSPWDIHD
KSYGNSDGNADNYNDFYDKQLREILDNPKYGRDGKFVEVWMDGAKGTGQDAQVYDFERFA
KTIKDLEGDECVIFQCGLQSDVRWSGNENGLAPDTVWNRVKIDGKWDPKTSDKMPWQTEN
NQPIKDQNRVHAGDPNGDKWVMSEADARITSGWFWGQNKKTPKSLVELGNMYFGSVGHGA
PFLLNVPLNTAGSVDPEIKQRVDEFGAAVKQSFQHDLTRADEKAGRTAATAEATSVWKNS
REFAPSMVLDGKDDTYWSAESGTGAQSMLITLPKAQSFDVVSFEEPIQNGQHIKSFTVSY
RNGSSGKWEEFGKGGTVGAKRLVRGPKVTATQVKIEVTTHDNTIPQLSEVGLYKAAKPFE
TPSPVPEGMETIDNEQMKTTGNWNKESGTQFVSNTGMWTNVQGASAEFEFTGTRFSIIGT
KDPGHGDMNVYIDGKLVETVSTKGSPRSTKTTLYTSGTLSNTKHMVKIEAKAGGNGNAVG
IDAAAVLNNGEVGMLDFDETAISMDEESTYELGITRSGGSKGALDVTVNFEPGSAVQGDF
DTNAQKVHFADGETHKTVTVRTKRNADGAGAGQNGQFTVTMTVSSPKELVLGNSSVTTVT
IIDRETNYTKAKLDEAIKKAKQNSFNAGNATAESAAKFSRALLNAEFVASRENPSADAIY
DAMKALREASDGIEFRKDLYSEENPFVFPSVVGQTMTMEGELGTIKDDPATDSNWPMSVK
EFQGASGGKVIDSIAQNDTLTIPFKAERAGTYKVVLRYMSGSNTNKLVWADAAKQDPVIK
SGEHAAGNSDGNAFKTVEFEFTVLHPGASKLVFTGPAEKSPRIDKLDITLTGDGLTSFGA
VGLAGTGGTIAPEGFVSPTSEQPVEFTIAPSEGYRILSVTKGGQPVEVPDPTAPMEVAVT
ADEAATADVEVKAFFERIPAPQPDPEPQPNPDPEPQPQPDPQPQPDPEPQPDPDSVPMTP
LEPATPVAPEQKPAKPAKPNGGLPQTGDPVGIAALLASASAAVGVLGAAIRRKR
>tr|B6VW91|B6VW91_9BACE Uncharacterized protein OS=Bacteroides dorei DSM 17855 OX=483217 GN=BACDOR_01584 PE=4 SV=1
MNKTFLLSVILGVLCFPVKAQTLPVPTPVQLQWQQMETTAFVHFSVNTYTDMEWGYGNES
PAIFNPTKLDCRQWIRTCKEAGLKGVILTAKHHDGFCLWPSAYTEYSVKNSPWKNGKGDL
VREFVDACHEYGMKVGLYLSPWDCNHPDYGKPEYITYFRNQLRELLTNYGKLYEFWFDGA
NGGRGYYSTDSLHTRKITADYYPWESLTEMVYELQPNCVVHGGSAQNIRWVGNEEGYALE
EHWSTVRKPEFYDKGIPNGKQWMRGHADGTLWIPSETDVSIRPGWYYHASEDHKLKSLSQ
LTDIYYESVGRNSLLLLNLTPNQEGLIPEQDSLRLVEWYRRYTSELKKNLVNQKMKVTGK
NRKKLKYTLDGNRGTYWEADTKTPVLEVDFGKELTFNRLLLQEFIEKGQRVKQFVVEYFD
NGNWQKLDEQTTIGYKRILRFPEVTASRLRIRITDAWEAPCLAEIQVFKAETPLDAPVIT
RNKNGEVKLVCSNKDASIYYTTDGKEPQPGVSPRYQSPVPADGDRIIKAIAVDGKKKSTT
ATRTFTGSKAHWSTLPDKAGTLVFDENQHTTWVGKDVLEVDLQSAKEMTGISYLPDQARW
ASGIVVKYMIEISLDGIRWEEAARGEFANIQNNPVEQQVIFWQTHKGRYIRFHALSTVDG
QKSMGVAELDILFSKN
>tr|A0A076IMZ3|A0A076IMZ3_9BACE Alpha-L-fucosidase OS=Bacteroides dorei OX=357276 GN=EL88_10895 PE=4 SV=1
MNKTFLLSVILGVLCFPVKAQTLPVPTPVQLQWQQMETTAFVHFSVNTYTDMEWGYGNES
PAIFNPTKLDCRQWIRTCKEAGLKGVILTAKHHDGFCLWPSAYTEYSVKNSPWKNGKGDL
VREFVDACHEYGMKVGLYLSPWDCNHPDYGKPEYITYFRNQLRELLTNYGELYEFWFDGA
NGGRGYYSTDSLHTRKITADYYPWESLTEMVYELQPNCVVHGGSAQNIRWVGNEEGYALE
EHWSTVRKPELYDKGIPNGKQWMRGHADGTLWIPSETDVSIRPGWYYHASEDHKLKSLSQ
LTDIYYESVGRNSLLLLNLTPNQEGLILEQDSLRLVEWYRRYTSELKKNLVNQKMKVTGK
NRKKLKYTLDGNRGTYWEADTKTPVLEVDFGKELTFNRLLLQEFIEKGQRVKQFVVEYFD
NGNWQKLDEQTTIGYKRILRFPEVTASRLRIRITDAWEAPCLAEIQVFKAETPLDAPVIT
RNKNGEVKLVCSNKDASIYYTTDGKEPQPGVSPRYQSPVPADGDRIIKAIAVDGKKKSTT
ATRTFTGSKAHWSTLPDKAGTLVFDENQHTTWVGKDVLEVDLQSAKEMTGISYLPDQARW
ANGIVVKYMIEISLDGIRWEEAARGEFANIQNNPVEQQVIFWQTHKGRYIRFHALSTVDG
QKSMGVAELDILFSKN
>tr|A0A0K2HMZ4|A0A0K2HMZ4_9BACE Alpha-L-fucosidase OS=Bacteroides dorei OX=357276 GN=IY41_19615 PE=4 SV=1
MNKTFLLSVILGVLCFPVKAQTLPVPTPVQLQWQQMETTAFVHFSVNTYTDMEWGYGNES
PAIFNPTKLDCRQWIRTCKEAGLKGVILTAKHHDGFCLWPSAYTEYSVKNSPWKNGKGDL
VREFVDACHEYGMKVGLYLSPWDCNHPDYGKPEYITYFRNQLRELLTNYGELYEFWFDGA
NGGRGYYSTDSLHTRKIAADYYPWESLTEMVYELQPNCVVHGGSAQNIRWVGNEEGYALE
EHWSTVRKPELYDKGIPNGKQWMRGHADGTLWIPSETDVSIRPGWYYHASEDHKLKSLSQ
LTDIYYESVGRNSLLLLNLTPNQEGLIPEQDSLRLVEWYRRYTSELKKNLVNQKMKVTGK
NRKKLKYTLDGNRGTYWEADTKTPVLEVDFGKELTFNRLLLQEFIEKGQRVKQFVVEYFD
NGNWQKLDEQTTIGYKRILRFPEVTASRLRIRITDAWEAPCLAEIQVFKAETPLDAPVIT
RNKNGEVKLVCSNKDASIYYTTDGKEPQPGVSPRYQSPVPADGDRIIKAVAVDGKKKSTT
VTRTFTGSKAHWSTLPDKAGTLVFDENQHTTWVGKDVLEVDLQSAKEMTGISYLPDQARW
ANGIVVKYMIEISLDGIRWEEAARGEFANIQNNPVEQQVIFRQTHKGRYIRFHALSTVDG
QKSMGVAELNILFSKN
>tr|A0A0M1W7U9|A0A0M1W7U9_9BACE Alpha-L-fucosidase OS=Bacteroides sp. 9_1_42FAA OX=457395 GN=BSBG_03783 PE=4 SV=1
MNKTFLLSVILGVLCFPVKAQTLPVPTPVQLQWQQMETTAFVHFSVNTYTDMEWGYGNES
PAIFNPTKLDCRQWIRTCKEAGLKGVILTAKHHDGFCLWPSAYTEYSVKNSPWKNGKGDL
VREFVDACHEYGMKVGLYLSPWDCNHPDYGKPEYITYFRNQLRELLTNYGELYEFWFDGA
NGGRGYYSTDSLHTRKIAADYYPWESLTEMVYELQPNCVVHGGSAQNIRWVGNEEGYALE
EHWSTVRKPELYDKGIPNGKQWMRGHADGTLWIPSETDVSIRPGWYYHASEDHKLKSLSQ
LTDIYYESVGRNSLLLLNLTPNQEGLIPEQDSLRLVEWYRRYTSELKKNLVNQKMKVTGK
NRKKLKYTLDGNRGTYWEADTKTPVLEVDFGKELTFNRLLLQEFIEKGQRVKQFVVEYFD
NGNWQKLDEQTTIGYKRILRFPEVTASRLRIRITDAWEAPCLAEIQVFKAETPLDAPVIT
RNKNGEVKLVCSNKDASIYYTTDGKEPQPGVSPRYQSPVLADGDRIIKAIAVDGKKKSTT
ATRTFTGSKAHWSTLPDKAGMLVFDENQHTTWVGKDVLEVDLQSAKEMTGISYLPDQARW
ANGIVVKYMIEISLDGIRWEEAARGEFANIQNNPVEQQVIFRQTHKGRYIRFHALSTVDG
QKSMGVAELDILFSKN
>tr|A0A1Y3ZHM0|A0A1Y3ZHM0_9BACE Alpha-L-fucosidase OS=Bacteroides dorei OX=357276 GN=B5F00_15765 PE=4 SV=1
MNKTFLLSVILGVLCFPVKAQTLPVPTPVQLQWQQMETTAFVHFSVNTYTDMEWGYGNES
PAIFNPTKLDCRQWIRTCKEAGLKGVILTAKHHDGFCLWPSAYTEYSVKNSPWKNGKGDL
VREFVDACHEYGMKVGLYLSPWDCNHPDYGKPEYITYFRNQLRELLTNYGKLYEFWFDGA
NGGRGYYSTDSLHTRKITADYYPWESLTEMVYELQPNCVVHGGSAQNIRWVGNEEGYALE
EHWSTVRKPEFYDKGIPNGKQWMRGHADGTLWIPSETDVSIRPGWYYHASEDHKLKSLSQ
LTDIYYESVGRNSLLLLNLTPNQEGLIPEQDSLRLVEWYRRYTSELKKNLVNQKMKVTGK
NRKKLKYTLDGNRGTYWEADTKTPVLEVDFGKELTFNRLLLQEFIEKGQRVKQFVVEYFD
NGNWQKLDEQTTIGYKRILRFPEVTASRLRIRITDAWEAPCLAEIQVFKAETPLDAPVIT
RNKNGEVKLVCSNKDASIYYTTDGKEPQPGVSPRYQSPVPADGDRIIKAIAVDGKKKSTT
ATRTFTGSKAHWSTLPDKAGMLVFDENQHTTWVGKDVLEVDLQSAKEMTGISYLPDQARW
ANGIVVKYMIEISLDGIRWEEAARGEFANIQNNPVEQQVIFRQTHKGRYIRFHALSTVDG
QKSMGVAELDILFSKN
>tr|A0A3A5ZQE7|A0A3A5ZQE7_9BACE Alpha-L-fucosidase OS=Bacteroides sp. AF25-18 OX=2292923 GN=DWY42_13630 PE=4 SV=1
MNKTFLLSVILGVLCFPVKAQILPVPTPVQLQWQQMETTAFVHFSVNTYTDMEWGYGNES
PAIFNPTKLDCRQWIRTCKEAGLKGVILTAKHHDGFCLWPSAYTEYSVKNSPWKNGKGDL
VREFVDACHEYGMKVGLYLSPWDCNHPDYGKPEYITYFRNQLRELLTNYGELYEFWFDGA
NGGRGYYSTDSLHTRKITADYYPWESLTEMVYELQPNCVVHGGSAQNIRWVGNEEGYALE
EHWSTVRKPELYDKGIPNGKQWMRGHADGTLWIPSETDVSVRPGWYYHASEDHKLKSLSQ
LTDIYYESVGRNSLLLLNLTPNQEGLIPEQDSLRLVEWYRRYTSELKKNLVNQKMKVTGK
NRKKLKYTLDGNRGTYWEADTKTPVLEVDFGKELTFNRLLLQEFIEKGQRVKQFVVEYFD
NGNWQKLDEQTTIGYKRILRFPEVTASRLRIRITDAWEAPCLTEIQVFKAETPLDAPVIT
RNKNGEVKLVCSNKDVSIYYTTDGKEPQPGVSPRYQSPVPADGDRIIKAIAVDGKKKSTT
ATRTFTGSKAHWSTLPDKAGMLVFDENQHTTWVGKDVLEVDLQSAKEMTGISYLPDQARW
ANGIVVKYMIEISLDGIRWEEAARGEFANIQNNPVEQQVIFRQTHKGRYIRFHALSTVDG
QKSMGVAELDILFSKN
>tr|A0A412Z055|A0A412Z055_9BACE Alpha-L-fucosidase OS=Bacteroides dorei OX=357276 GN=DWW04_16575 PE=4 SV=1
MNKTFLLSVILGVLCFPVKAQTLPVPTPVQLQWQQMETTAFVHFSVNTYTDMEWGYGNES
PAIFNPTKLDCRQWIRTCKEAGLKGVILTAKHHDGFCLWPSAYTEYSVKNSPWKNGKGDL
VREFVDACHEYGMKVGLYLSPWDCNHPDYGKPEYITYFRNQLRELLTNYGKLYEFWFDGA
NGGRGYYSTDSLHTRKITADYYPWESLTEMVYELQPNCVVHGGSAQNIRWVGNEEGYALE
EHWSTVRKPEFYDKGIPNGKQWMRGHADGTLWIPSETDVSIRPGWYYHASEDHKLKSLSQ
LTDIYYESVGRNSLLLLNLTPNQEGLIPEQDSLRLVEWYRRYTSELKKNLVNQKMKVTGK
NRKKLKYTLDGNRGTYWEADTKTPVLEVDFGKELTFNRLLLQEFIEKGQRVKQFVVEYFD
NGNWQKLDEQTTIGYKRILRFPEVTASRLRIRITDAWEAPCLAEIQVFKAETPLDAPVIT
RNKNGEVKLVCSNKDASIYYTTDGKEPQPGVSPRYQSPVPADGDRIIKAIAVDGKKKSTT
ATRTFTGSKAHWSTLPDKAGTLVFDENQHTTWVGKDVLEVDLQSAKEMTGISYLPDQARW
ANGIVVKYMIEISLDGIRWEEAARGEFANIQNNPVEQQVIFWQTHKGRYIRFHALSTVDG
QKSMGVAELDILFSKN
>tr|A0A413GSY6|A0A413GSY6_9BACE Alpha-L-fucosidase OS=Bacteroides dorei OX=357276 GN=DXA69_05010 PE=4 SV=1
MNKTFLLSVILGVLCFPVKAQILPVPTPVQLQWQQMETTAFVHFSVNTYTDMEWGYGNES
PAIFNPTKLDCRQWIRTCKEAGLKGVILTAKHHDGFCLWPSAYTEYSVKNSPWKNGKGDL
VREFVDACHEYGMKVGLYLSPWDCNHPDYGKPEYITYFRNQLRELLTNYGELYEFWFDGA
NGGRGYYSTDSLHTRKITADYYPWESLTEMVYELQPNCVVHGGSAQNIRWVGNEEGYALE
EHWSTVRKPELYDKGIPNGKQWMRGHADGTLWIPSETDVSVRPGWYYHASEDHKLKSLSQ
LTDIYYESVGRNSLLLLNLTPNQEGLIPEQDSLRLVEWYRRYTSELKKNLVNQKMKVTGK
NRKKLKYTLDGNRGTYWEADTKTPVLEVDFGKELTFNRLLLQEFIEKGQRVKQFVVEYFD
NGNWQKLDEQTTIGYKRILRFPEVTASRLRIRITDAWEAPCLTEIQVFKAETPLDAPVIT
RNKNGEVKLVCSNKDVSIYYTTDGKEPQPGVSPRYQSPVPADGDRIIKAIAVDGKKKSTT
ATRTFTGSKAHWSTLPDKAGMLVFDENQHTTWVGKDVLEVDLQSAKEMTGISYLPDQARW
ANGIVVKYMIEISLDGIRWEEAARGEFANIQNNPVEQQVIFRQTHKGRYIRFHALSTVDG
QKSMGVAELDILFSKN
>tr|C3RD00|C3RD00_9BACE F5/8 type C domain protein OS=Bacteroides dorei 5_1_36/D4 OX=556260 GN=BSEG_03050 PE=4 SV=1
MNKTFLLSVILGVLCFPVKAQTLPVPTPVQLQWQQMETTAFVHFSVNTYTDMEWGYGNES
PAIFNPTKLDCRQWIRTCKEAGLKGVILTAKHHDGFCLWPSAYTEYSVKNSPWKNGKGDL
VREFVNACHEYGMKVGLYLSPWDCNHPDYGKPEYITYFRNQLRELLTNYGELYEFWFDGA
NGGRGYYSTDSLHTRKITADYYPWESLTEMVYELQPNCVVHGGSAQNIRWVGNEEGYALE
EHWSTVRKPEFYDKGIPNGKQWMRGHADGTLWIPSETDVSIRPGWYYHASEDHKLKSLSQ
LTDIYYESVGRNSLLLLNLTPNQEGLIPEQDSLRLVEWYRRYTSELKKNLVNQKMKVTGK
NRKKLKYTLDGNRGTYWEADTKTPVLEVDFGKELTFNRLLLQEFIEKGQRVKQFVVEYFD
NGNWQKLDEQTTIGYKRILRFPEVTASRLRIRITDAWEAPCLAEIQVFKAETPLDAPVIT
RNKNGEVKLVCSNKDASIYYTTDGKEPQPGVSPRYQSPVPADGDRIIKAIAVDGKKKSTT
ATRTFTGSKAHWSTLPDKAGMLVFDENQHTTWVGKDVLEVDLQSAKEMTGISYLPDQARW
ANGIVVKYMIEISLDGIRWEEAARGEFANIQNNPVEQQVIFRQTHKGRYIRFHALSTVDG
QKSMGVAELDILFSKN
>tr|D1K8C2|D1K8C2_9BACE F5/8 type C domain protein OS=Bacteroides sp. 3_1_33FAA OX=457391 GN=HMPREF0105_3833 PE=4 SV=1
MNKTFLLSVILGVLCFPVKAQTLPVPTPVQLQWQQMETTAFVHFSVNTYTDMEWGYGNES
PAIFNPTKLDCRQWIRTCKEAGLKGVILTAKHHDGFCLWPSAYTEYSVKNSPWKNGKGDL
VREFVDACHEYGMKVGLYLSPWDCNHPDYGKPEYITYFRNQLRELLTNYGELYEFWFDGA
NGGRGYYSTDSLHTRKITADYYPWESLTEMVYELQPNCVVHGGSAQNIRWVGNEEGYALE
EHWSTVRKPELYDKGIPNGKQWMRGHADGTLWIPSETDVSIRPGWYYHASEDHKLKSLSQ
LTDIYYESVGRNSLLLLNLTPNQEGLILEQDSLRLVEWYRRYTSELKKNLVNQKMKVTGK
NRKKLKYTLDGNRGTYWEADTKTPVLEVDFGKELTFNRLLLQEFIEKGQRVKQFVVEYFD
NGNWQKLDEQTTIGYKRILRFPEVTASRLRIRITDAWEAPCLAEIQVFKAETPLDAPVIT
RNKNGEVKLVCSNKDASIYYTTDGKEPQPGVSPRYQSPVPADGDRIIKAIAVDGKKKSTT
ATRTFTGSKAHWSTLPDKAGTLVFDENQHTTWVGKDVLEVDLQSAKEMTGISYLPDQARW
ANGIVVKYMIEISLDGIRWEEAARGEFANIQNNPVEQQVIFWQTHKGRYIRFHALSTVDG
QKSMGVAELDILFSKN
>tr|I9QX31|I9QX31_9BACE Uncharacterized protein OS=Bacteroides dorei CL03T12C01 OX=997877 GN=HMPREF1065_03553 PE=4 SV=1
MNKTFLLSVILGVLCFPVKAQTLPVPTPVQLQWQQMETTAFVHFSVNTYTDMEWGYGNES
PAIFNPTKLDCRQWIRTCKEAGLKGVILTAKHHDGFCLWPSAYTEYSVKNSPWKNGKGDL
VREFVDACHEYGMKVGLYLSPWDCNHPDYGKPEYITYFRNQLRELLTNYGELYEFWFDGA
NGGRGYYSTDSLHTRKIAADYYPWESLTEMVYELQPNCVVHGGSAQNIRWVGNEEGYALE
EHWSTVRKPELYDKGIPNGKQWMRGHADGTLWIPSETDVSVRPGWYYHASEDHKLKSLSK
LTDIYYESVGRNSLLLLNLTPNQEGLIPEQDSLRLVEWYRRYTSELKKNLVNQKMKVTGK
NRKKLKYTLDGNRSTYWEADTKTPVLEVDFGKELTFNRLLLQEFIEKGQRVKQFVVEYFD
NGNWQKLDEQTTIGYKRILRFPEVTASRLRIRITDAWEAPCLAEIQVFKAETPLDAPVIT
RNKNGEVKLVCSNKDASIYYTTDGKEPQPGVSPRYQSPVPADGDRIIKAIAVDGKKKSTT
ATRTFTGSKAHWSTLPDKAGMLVFDENQHTTWVGKDVLEVDLQSAKEMTGISYLPDQARW
ANGIVVKYMIEISLDGIRWEEAARGEFANIQNNPVEQQVIFRQTHKGRYIRFHALSTVDG
QKSMGVAELDILFSKN
>tr|B7GNN8|B7GNN8_BIFLS Alpha-1,3/4-fucosidase, putative OS=Bifidobacterium longum subsp. infantis (strain ATCC 15697 / DSM 20088 / JCM 1222 / NCTC 11817 / S12) OX=391904 GN=Blon_2336 PE=1 SV=1
MNNPADAGINLNYLANVRPSSRQLAWQRMEMYAFLHFGMNTMTDREWGLGHEDPALFNPR
NVDVDQWMDALVAGGMAGVILTCKHHDGFCLWPSRLTRHTVASSPWREGKGDLVREVSES
ARRHGLKFGVYLSPWDRTEESYGKGKAYDDFYVGQLTELLTQYGPIFSVWLDGANGEGKN
GKTQYYDWDRYYNVIRSLQPDAVISVCGPDVRWAGNEAGHVRDNEWSVVPRRLRSAELTM
EKSQQEDDASFATTVSSQDDDLGSREAVAGYGDNVCWYPAEVDTSIRPGWFYHQSEDDKV
MSADQLFDLWLSAVGGNSSLLLNIPPSPEGLLAEPDVQSLKGLGRRVSEFREALASVRCE
ARTSSASAAAAHLVDGNRDTFWRPDADDAAPAITLTLPQPTTINAIVIEEAIEHGQRIEH
LRVTGALPDGTERVLGQAGTVGYRRILRFDDVEVSSVTLHVDGSRLAPMISRAAAVRI
>tr|A0A083XQ87|A0A083XQ87_BIFLI Alpha-L-fucosidase OS=Bifidobacterium longum subsp. infantis EK3 OX=1457183 GN=EK3BL_00575 PE=4 SV=1
MNNPADAGINLNYLANVRPSSRQLAWQRMEMYAFLHFGMNTMTDREWGLGHEDPALFNPR
NVDVDQWMDALVAGGMAGVILTCKHHDGFCLWPSRLTRHTVASSPWREGKGDLVREVSES
ARRHGLKFGVYLSPWDRTEESYGKGKAYDDFYVGQLTELLTQYGPIFSVWLDGANGEGKN
GKTQYYDWDRYYNVIRSLQPDAVISVCGPDVRWAGNEAGHVRDNEWSVVPRRLRSAELTM
EKSQQEDDASFATTVSSQDDDLGSREAVAGYGDNVCWYPAEVDTSIRPGWFYHQSEDDKV
MSADQLFDLWLSAVGGNSSLLLNIPPSPEGLLAEPDVQSLKGLGRRVSEFREALASVRCE
AKTSSASDAAAHLVDGNRDTFWRPDADDAAPAITLTLPQPTTINAIVIEEAIEHGQRIEH
LRVTGALPDGTERVLGQAGTVGYRRILRFDDVEVSSVTLHVDGSRLAPMISRAAAVRI
>tr|A0A0M4LTU9|A0A0M4LTU9_BIFLI Alpha-1,3/4-fucosidase OS=Bifidobacterium longum subsp. infantis OX=1682 GN=RY67_476 PE=4 SV=1
MSNPADAGINLNYLANVRPSSRQLAWQRMEMYAFLHFGMNTMTDREWGLGHEDPALFNPG
NVDVDQWMDALVAGGMAGVILTCKHHDGFCLWPSRLTRHTVASSPWREGKGDLVREVSES
ARRHGLKFGVYLSPWDRTEESYGKGKAYDDFYVGQLTELLTQYGPIFSVWLDGANGEGKN
GKIQYYDWDRYYNVIRSLQPDAVISVCGPDVRWAGNEAGHVRDNEWSVVPRRLRSAELTM
EKSQQEDDASFATTVSSQDDDLGSREAVAGYGDNVCWYPAEVDTSIRPGWFYHKSEDDKV
MSADQLFDLWLSAVGGNSSLLLNIPPSPDGLLAEPDVQSLKGLGRRVSEFREALASVRCE
ARTSSASEAAAHLVDGDRDTFWCPDADDASPAITLALPQPTTINAIVIEEAIEHGQRIEH
LRVTGALPDGTERVLGQAGTVGYRRILRFDDVEVSSVTLHVDGSRLAPMISRAAAVRI
>tr|A0A1S2VSR7|A0A1S2VSR7_BIFLI Alpha-L-fucosidase OS=Bifidobacterium longum subsp. infantis OX=1682 GN=BFS25_09945 PE=4 SV=1
MSNPADAGINLNYLANVRPSSRQLAWQRMEMYAFLHFGMNTMTDREWGLGHEDPALFNPR
NVDVDQWMDALVAGGMAGVILTCKHHDGFCLWPSRLTRHTVASSPWREGKGDLVREVSES
ARRHGLKFGVYLSPWDRTEESYGKGKAYDDFYVGQLTELLTQYGPIFSVWLDGANGEGKN
GKTQYYDWDRYYNVIRSLQPDAVISVCGPDVRWAGNEAGHVRDNEWSVVPRRLRSAELTM
EKSQQEDDASFATTVSSQDDDLGSREAVAGYGDNVCWYPAEVDTSIRPGWFYHQSEDDKV
MSADQLFDLWLSAVGGNSSLLLNIPPSPEGLLAEPDVQSLKGLGRRVSEFREALASVRCE
ARTSSASDAAAHLVDGDRDTFWRPDADDAAPAITLTLPQPTTINAIVIEEAIEHGQRIEH
LRVTGALPDGTERVLGQAGTVGYRRILRFDDVEVSSVTLHVDGSRLAPMISRAAAVRI
>tr|B8ASX3|B8ASX3_ORYSI Uncharacterized protein OS=Oryza sativa subsp. indica OX=39946 GN=OsI_16968 PE=4 SV=1
MATILLLLLGLLVGLPLLRAHGVTGSAAPTPPPLPVLPVPSYAQLQWQLSEMALFLHFGP
NTFTDSEWGSGRTDPAVFAPSALDAGPIIGLGLYLSPWDRHEPVYGDTVAYNEHYLGQMT
ELLTRYGDVEEVWLDGAKGEGKDMDYMFDAWFALIHQLQQRVVIFSDAGPDTRWVGDEAG
VAGYTCWSPFNKSTVTIGHIIPEYSRCGDPFGQDWVPAECDVSIRPGWFWHASEKPKNAT
TLLDIYYKSVGRNCLLILNVPPNSSGLISTEDMQVLQEFTEIRQTIFSQNFAANATVTAS
TVRGGLGNQQFAPSNVLQESIYSYWAPEEGQSSWEMLFDLGQSASFNVIQLQEPIQMGQR
VIKFRVEIWWMNSGNNC
>tr|B9G4L9|B9G4L9_ORYSJ Uncharacterized protein OS=Oryza sativa subsp. japonica OX=39947 GN=OsJ_30048 PE=4 SV=1
MEPKVSSTVAAAMHRDKRDDGSVRVAALRSRRRADRRRCGGHIVVVGGGDGDAAAAGAAG
ADGGAAEVAAAGGDHVLPLRDEHVHGLRVGHGAGAAGGVPPGGPGSFALDGPRRSRRALG
SSSSSPSTTTGFCLWPSAHTAHSVRASPWRGGRGDVVREFADAARARGLDIGIYLSPWDR
HDKRYGREVAYNEYYLAQLHELLTGYGSVSEIWFDGAKGKNATNMTYHFQEWFQTVRQLQ
SSINIFSDDGPDLRWVGDENGSAGSTCWSTINRSKITIGEAGIEKYLNTGDPRGKDWVPP
ECDVSIRPGWFWHKNETAKPLPELLEVYYNSVGRNCVLLLNAPPNTTGLVDAADIARLRE
FRTAVTAIFGTDLAAGSAARASSERGGRFAAANVLDGRDDTYWAPAAAEAEDGGGYWIEL
RRPASAAARKFNVVRIQEHVAMGQRVERHEVYVDGGGAAVASGTTVGHKRLHRLGAPVAG
RTVRVWLASRRGPPLLSAVGLHLDPFAAGGGTM
>tr|B9I4I0|B9I4I0_POPTR Uncharacterized protein OS=Populus trichocarpa OX=3694 GN=POPTR_012G131400 PE=4 SV=2
MAKLWCLLTIITLLQVSKVVISRREVTTPPLPILPLPSSSQLKWQERELIMFLHFGVNTF
TDSEWGTGHENPAIFNPVGLNASQWVNVAAEAGFSLMILTAKHHDGFCLWPSKYTDHSVA
SSPWKNGRGDVVQELVIAARAHEGIDVGLYLSPWDRHDKRYGHDLQYNEYYLAQLQELLN
KYGSVREIWFDGAKGSNVPNMSYYFSDWFSMVKELQTSINIFSDAGPDVRWVGNEMGFAG
STCWSTINRTSLSIGNGSIVDYLNTGDSKGTDWLPAECDVSIRKGWFWHKSESPKRLSEL
LDIYYKSVGRNCVLLFNVPPNTTGLISENDVQRLKEFRGAIDTIFSTNLAESCFVRASSQ
RGGKDGDFGPENVLDGDHLWTYWAPKDEESEDNWIEFKCIDKLRFNVIRIQEAIGLGQRI
KQHEVYVDGRKVAKGTTVGHKRLHRLEKGVVKGHIVSIKILKSRAVPLMSSIGLHYDPFW
HPNET
>tr|B9ICY8|B9ICY8_POPTR Uncharacterized protein OS=Populus trichocarpa OX=3694 GN=POPTR_015G133500 PE=4 SV=1
MGKLQCFLFIITLLQVSKLVISERDQVTTPPLPILPLPSFSQLKWQERELIVFLHFGVNT
FTDSEWGTGHENPAIFNPVGLNANQWVKVAAEAGFSLMILTAKHHDGFCLWPSKYTGHSV
ESSPWKNGHGDVVQELVNAAKNHGGIDVGLYLSPWDRHDKRYGNDLEYNGYYMAQLQELL
NKYGSIREIWFDGAKGSNAPNMSYYFSDWFSMVKELQASINIFSDAGPDVRWVGNENGFA
GDSCWSTINRTSLSIGNGSIVDYLNTGDPEGTDWLPAECDVSIRRGWFWHKSESPKKLSM
LLDIYYKSVGRNCVLLFNVPPNSTGLVSEDDAQRLREFRGAIDTIFSTNLADKCLTKASS
QRGDQDSDFGPQNVLDSDHLWTYWAPKDEEFKDNWIEIKCIDELRFNVIRIQEAIGLGQR
IKQHEVYVDGKKVAKGTTVGHKRLHRIEEGVVKGRTVRIQILKSRAVPLISSVGLHYDPF
WHPDN
>tr|A0A1Z8SI96|A0A1Z8SI96_9FLAO Glycoside hydrolase family 29 OS=Flavobacteriaceae bacterium TMED48 OX=1986717 GN=CBC08_01050 PE=4 SV=1
MKFSVKQKLNILSILLISISSCTSVEEPLTAVGPVPNEYQLAWQELEYYAFIHFNMNTFT
NKEWGYGDEQPSQFNPTELDTRQWARVAKESGMKGIIITAKHHDGFCLWPSKFTEHSVKN
SPWREGKGDLIRELSEACKEYGLKFGVYLSPWDRNHPAYGSAEYITYFRNQLRELLTQYG
DIFEVWFDGANGGDGYYGGANEERRVDKKSYYDWPTTIEMVRRLQPQAVIFSDAGPDIRW
VGNEKGYANETTWSPIYRDSVYAGMPDFQRFAAGQENGTHWVPTETDVSIRPGWYYHPEQ
DNQVKSLSKLVDIYYNSVGLNSSLLLNLPVDTRGLVHENEVANLKALAEFLKETFAVNYA
KGQQLKTSTTAKGYSNTALLDDDLKSYWVSQSKDPSPTIELLLEKPVEVNTFMIQEYLPL
GQRIKSFSLEVLSNGAWEKVYEGSTIGNKRLVRFDTQAVEGIRFTVTDTKDRAVFSNMGL
FKAPKLNE
>tr|B9R9L2|B9R9L2_RICCO Alpha-l-fucosidase, putative OS=Ricinus communis OX=3988 GN=RCOM_1498560 PE=4 SV=1
MPKLWHFIFIVTLFLQRSKFGISRREQVPTPPLPVLPLPSFSQLKWQQRELIMFLHFGVN
TFTDSEWGTGHENPAIFNPVGLNANQWVSAAAEAGISLMILTAKHHDGFCLWPSKYTDHS
VERSPWKNGRGDVVQELVSAAKNYDGIDVGLYLSPWDRHDRRYGHNLQYNEYYLAQLQEL
LTKYGSVREIWFDGAKGSNAPNMSYYFWDWFAMVKELQSSINIFSDAGPDVRWVGNENGF
AGNTCWSTINLTSLSIGNGSTVDYLNTGDPKGTDWLPAECDVSIRKGWFWHKSQTPKKLS
KLLEIYYNSVGRNCVLLLNVPPNTTGLISYSDVQRLKEFRTAIDTIFATNLAEKCFLKVS
SQRGGKDGGFGPENLLDSDHLWTYWVPRNEEKEGGWIEIRCSGGLRFNVIRIQEAIGLGQ
RIKRHEIYVDGKKVAKGTTIGYKRLHRLEEVVDGQNVNIKFLESRDVPLISSIGLHYDPY
WNPV
>tr|B9SCI4|B9SCI4_RICCO Alpha-l-fucosidase, putative OS=Ricinus communis OX=3988 GN=RCOM_0473780 PE=4 SV=1
MKEYEKKKKKMSIKNSNFGSKHQKPILNHIIPDKFLIFLSLSSISISCYALQKPPPLPIL
PLPSAPQLQWQLTSMALFLHFGTNTFTDSEWGSGRADPSIFNPTQFNAAQWVQVAKDSGF
SRLILTAKHHDGFCLWPSNYTDYSVKSSSWRNGTGDVVKELALAAKEAGIDLGFYLSPWD
RHEASYGKSLEYNEYYMGQMTELLTRYGEIKEVWLDGAKGEGEKDMEYFFDRWFGLIRQL
QPGAVIFSDAGPDTRWIGDENGAAGSTCWSLFNRSAVKIGGADPKYSQRGDPSGHDWVPA
ECDVSIRPGWFWHASETPKSAMKLLEIYYNSAGRNCLLLLNVPPNASGLISAEDIQVLQE
FAQLRRSIFSYNIAKNKIALLSASSTRGGNGNSQFDPYNVLKEGIYTYWAPEENQYNWEL
HLELQELVAFNVLQVQEPIHMGQRIIEFHVEILEDGEWKKVINGTTVGYQRLLQFPTAVS
QHIKFVVDKSREDPLISYLGIYIDQFSIVSNKFGNNCSQTHSISSQVLRQQNSKLNITIA
SMAVEYFSKLHKIILNLLQYNV
>tr|B9Y9N9|B9Y9N9_9FIRM Repeat protein OS=Holdemania filiformis DSM 12042 OX=545696 GN=HOLDEFILI_02546 PE=4 SV=1
MKKLISLLTAAVMIFTVMVPSSSGAIHAESLNSPTRQNETQVQNVDEEQSEEKTEESETP
GSAEPDEKLEESSPTEPSEGMETPLPPEAAESTPTPLPTEPGTENKIPVQPKAAVKEKQG
INEPALQADADFFDDFGDTAGSEINLDYWGYLEGDKAIVQRDPEATDAQNGKGYSFYTDG
TNKLFIEHKFENNIRGKISVDFYDDGTDQTGRMAQVNLTGIANKENKGKSFIIGLGINQN
QTTQGWSNSNYCARIAEDGRFIDTQIARTKGWHTFTMEVSEQGTELSIDGTAVDASGIPG
SDLVTSFNAIQLGDKWASGGETYFDNIRLENMTIVDVDAEEAAKHDASARTIKVGGISIP
EFDAETLEYLWEYPAGSALPEVAAEANNEKAKVEIEQATEATPKATITITAIDGSTVRTY
TITFKEAAQEIEKEWSATFDEDDPKMKWELLDSRGQYFEVTDEQAHDGTHSFVTRGEAAK
KSWIFKKFDSAVNGKVSVWFYDTMGDNGKESFQQVNIWAPFSKVTEQPAIAGLGTDGKTN
YAIRLGTSAGYAQSKVKRTRGWHEFVFDLTSGSDANFYIDGTLVHTTDAITSIGALQMGD
IWSTSKATAYYDDVKITEISLGVSGIRLDQEEADIVCGETLQLNATVLPIGTSSEILWTS
SNEKIATVDENGLVTANGIMGDATITATTKKGNYTASCVIHTTMSAEQDATLASILIDGK
ELSSFKPEQLDYTVTVVDTQVPTVTAVAHQKEAVVTITETSEIPGTTTIEVTAKDKVNKQ
VYTVHFEMLKEAFFDDFSYTDPEDLEKRGNWDVQEGTGRRPGDRTWGWSADNVVLMEDAE
DPDNTIVRLKAKTDGTGGENTTQSQIRYYEEKFGAGTYVARVWLYDNVMESEDPEGTGAW
NAKDQALSTFFTINRIEGPKWKPYHESDFEYLFNGGWGMGPKTMWFTSWNSYSLETSSEA
QRDQSSSTGPSAVGSLDGRWSILTIKLDEDGRTTYYIDGQQKASHANKDEIAGPQSIAFN
LWFIGGGQDKKYNGHSRTYWEDVDWVYYTPDTNTTTAEVEEIVTGMKNANIHVFDDIASP
DITLNSITVDGQALEGFNNENTEYFIELPEGTKKAPKVEANANNQFSIVTVTSPETLPGA
TTVYVTSSDLSVTKTYHLNFSVKGNSELAAPLSNFASGSMVKYRDVQLFHPQNADIYYTM
DGSTPTTASRKYGGETIRIEKSTNIKAIAAADGKTSPVADFLYTVIPLTPQVVAHPDAAI
NGSSIMKNGILDTTKLTYDDPVTLELSMPESKQRFYEVPGRTDNYQFYYTTDGSLPTVDQ
YHPNPSTRLYEGPIEINKTTTVNFIAVLPGVCESYESTQALRSQYSQVKITIKNGLYDIV
FDSKGGSNIPSLTKVKAGSLIDKPEDPTKLDFIFDGWYKDEKYTKAWDFTADKVTGDTTL
YAKWSRDVTAAPAPYGALPSEQQMRYYEEELAGFVHYGPNTYKGTNGIEWGNDGTYTPDT
MQYPDTIDTDQWVETFKNAGFKRLIFTAKHHDGFRLFDTDEFSTAQSKNGKDILALLSAS
CTKYNMNMGLYLSPWDVFEEKGKSIVYGERGAYGNGSGSTDSSPLDDDYNILYEKHLREI
FDNPKYGNNGEFVELWLDGANGSGLKQLYDFPVWLDIAKGSNGVQDTRDEMIVYGPPYVS
GKDAAWCGNEKGEIDPNKPSTMTPGTGPTEPIPDPAAESEWVVWEGDFSIRPGWFYHPNE
NGKVKTGEYLLDRYMQTVGQGGIMLLNIPPNRNGLIDDIDVENLNEFARLREETFGEGKN
LARGSNVTATSEKVRSERFSASNLVDGDYDTYWTMADEERQGTVIIDLGQPKTFDVVELQ
EYIPLGQRIDAYQVEVFVNGQWQEFSKGTVVGYRKMSTNQPVKTDKLRITVSSENAVPVL
NSINLYKLPVAAEKGEPVPAGLKYIDDCKMTVGTPSTNYQSDAWYQNNKETKLNLVHNDY
TALSQNGYKDVTFTGSKFYIRGAWNSNGSDLRITIDNGEPLVVDMTSGKSSDPRHPYPGD
NQGAIVYSSEDLEYGQHTVRIEAEDKSGQDKSVLIDALIYNDEPTGSFEFEDVGSVDFNE
GEQVKVNVTRLGDVSQAAEINVASYPGTAVHGEDFKQETVTLKFAVGERTKTAVFETYDN
SKVEENQFFYLELEPVNAKTPASYNMSLIVNLIDNDGEVPGQAHKIIIDSNVKNGKISVN
QSEAFAGDEISITVTPDAGYELVQDSLKVNGQVIVGNSFVMPGEDVILTAEFTKIPEPTT
PPESSDNTPSYDDGGPFIKDVCGNVFDRWGNKIYSAPACEVSGGYQVPNTGVR
>tr|C0BKJ8|C0BKJ8_FLABM Coagulation factor 5/8 type domain protein OS=Flavobacteria bacterium (strain MS024-2A) OX=487796 GN=Flav2ADRAFT_0035 PE=4 SV=1
MIKNSLLSIGLMLLLFSSSCSNEILPIPPVEPLPNEYQLAWQELEYYGFIHFNMNTFTNK
EWGYGNEIPAQFNPSELDARQWARVAKEAGMKGLIITAKHHDGFSLWPSAYTEHSVKNSP
WKEGKGDLIQELSDACKEFGLKFGVYLSPWDRNHADYGKKEYVDYYRNQLRELLTNYGPI
FEVWFDGANGGDGFYGGANEERRVEKRTYYEWKTTIDLVRDLQPKAVIFSDAGPDIRWVG
NERGYAYDTTWSPILRDSVYAGMPGFDKYAKGQENGTHWVPTESDVSIRPGWYYHPEQDD
KVKTLSQLVDIYFNSVGRNSNFLLNLPIDTRGLVHENDEAQLKKLAIYLSKMYETDFADS
AKIKASVSRQGYAADLIHDTNKHSYWAAPEGVNTAQIELEWTSPQEVNTFMVQEYIPLGQ
RIKSFTFEVKTEEGWQTLETGATVGNKRLIRFNTPPITALRFSIIDSKASPILSNLGVYK
APKLPTE
>tr|A0A1Z9N675|A0A1Z9N675_9FLAO Glycoside hydrolase family 29 OS=Flavobacteriaceae bacterium TMED204 OX=1986709 GN=CBD64_00585 PE=4 SV=1
MCFRLMXYISASLXLLLSACSPNPPGAITPXDVVPSQNLIDYQQMELIGFXHFTVNTFTD
KEWGYGDESPEIFNPSQLDVEQWVKTAKAAGMKQLILTAKHHDGFCLWPSNYTEHSIKNS
PYKAGKGDIVKEFVMACKKYGLKAGLYLSPWDRNHKDYGKESYIVYYKNQLEEXLTQYGE
INEIWFDGANGGDGFYGGANEIRKIDRDTYYGWPNIISFVKNIQPNIKIFSDAGPDVHWI
GNEKGFAGSTFWSTINTENLTIGASNTEYLNTGDPNGNQWIVGQCDVSIRPGWFYHASQD
SLVKTPQQLLDIYYKSVGRNALLLLNLPPDKRGVIHENDVKALTEFKAILDESFSLNLAK
NQKVSANSQRYNHSKFSPQNTVDQDPKTYWATEDDILPADLEVDLVKEETFDRIXIQEPI
EFGQRISQFEIDIFDSQQWKNIFKGTTIGYKRILRIPKVKTNKIRLRITAANNTVAISNF
GLFKSSPNEK
>tr|A0A2E5JE36|A0A2E5JE36_9FLAO Glycoside hydrolase family 29 OS=Flavobacteriaceae bacterium OX=1871037 GN=CMC93_06225 PE=4 SV=1
MCFRLMIYISASMLLLLTACSQNRHEAIAPNEVIPNQSLIDYQQMELIGFIHFTVNTFTD
KEWGYGDESPEIFNPSQLDVEQWVKTAKNVGMKQLILTAKHHDGFCLWPSKYTKHSIKNS
PYKSGKGDIVKEFVMACKKYGLKAGLYLSPWDRNHKDYGKESYIVYYKNQLEELLTQYGE
INEIWFDGANGGDGFYGGVNEIRKIDRKTYYGWPNIISFVKNIQPNIKIFSDAGPDVHWI
GNEKGFAGSTFWSTINTDNLTIGASNTEYLNTGDSNGNQWVVGQCDVSIRPGWFYHASQD
SLVKTPQQLLEIYYKSVGRNAVLLLNLPPDKRGIIHENDVKVLTEFKAILDESFSLNLAK
NQKALANSQRCNHSKFSPHNTVDQDPKTYWATEDGILPANIEFELIKEETFDRIVIQEPI
ELGQRISSFEIDIFDSIQWKNIFKGTTIGYKRILRIPRVKTNKIRLRITAANNTVAISNF
GLFKSSPNEK
>tr|A0A1Z9N7P3|A0A1Z9N7P3_9FLAO Glycoside hydrolase family 29 OS=Flavobacteriaceae bacterium TMED208 OX=1986711 GN=CBD68_03665 PE=4 SV=1
MLQKFFFLIFSLIFITKCITIESDLEPVGPIPNKYQSDWQELEYYAFIHFNMNTFTNKEW
GXGDEKPSQFNPTELDXXQWARVVKEAGMKGXIITAKHHDGFCLWPSKFTEHSVKNSPWK
MGKGDLIRELSKACKEYGLKFGVYLSPWDRNHPSYGKSEYITYFRNQLRELLTEYGEIFE
VWFDGANGGDGFYGGANEERRVDKKMYYDWPXTIELVRSLQPQAVIFSDAGPDIRWVGNE
KGYANETTWSPIYRDSVFAGMPDFQRFASGQENGTHWVPTETDVSIRPGWYYHPEQDDQV
KSLSKLVDIYYNSVGLNSSLLLNLPVDNRGLIHENEVKNLKALADYLNTTFSYNYSKGQK
VKTSSTFKGYENKALIDDDKKTYWASXVNDQNPTIEIHLDNPVLVNTFMIQEYLPMGXRX
KSFYFEVFXXGNWXKXYEGSTIGNKRLIRFXTXXIEXARFTVXDKKAQIVISNIGLFXAK
DLDN
>tr|A0A1Z9NAE8|A0A1Z9NAE8_9FLAO Glycoside hydrolase family 29 OS=Flavobacteriaceae bacterium TMED212 OX=1986712 GN=CBD72_02960 PE=4 SV=1
MKTKKIAAILYLLFLDCQSIPPLELAPNNVVPSQKLITYQEMELIGFIHFTVNTFTDKEW
GYGDESPDIFNPSAMDVEQWAKTAKAAGMKQLILTAKHHDGFCLWPSQYTEHSVKNSPYK
NGKGDVVGEFVAACRKYGLKAGLYLSPWDRNHKDYGTQAYITYYKNQLEELLTQYGEINE
IWFDGANGGDGYYGGANEIRKIDRDTYYGWKDIITLVKNLQPNIKIFSDAGPDVHWIGNE
KGFAGSTFWSTINPKSLTIGASKTNYLNTGDPEGTQWIVGQCDVSIRPGWFYHTNQDSLV
KSPQQLADIYYKSVGRNALLLLNLPPDKRGLIHENDVKALTDFKSIINESLASDLAKGQK
ASANNYRLNHSKFDPKNTLDGDPTTYWATDDNIFPANLEIELNQGRTFDRILIQXPIRLG
QRISEFEVDVMGDTGWNTIFKGTTIGYKRILRIPTVNTKKIRLKFTQANNIVAISNLELY
KSSPREVXQ
>tr|C0EIJ2|C0EIJ2_9FIRM F5/8 type C domain protein OS=[Clostridium] methylpentosum DSM 5476 OX=537013 GN=CLOSTMETH_03686 PE=4 SV=1
MHNRAQKLSIDSQDCARFPFEKVYNLDVKLFLFHIFSCVIIRKEESFRSALNPNKKFGDE
RKGKSNMMKSFLKKLLAAAVVAAMAAQAVSVSAAAVADDLSVQAPDPYGPLPNAMQLQYH
QEELSAFCHFGMNTFTNKEWGNGQENPEWFNPTGFHPEEWVKQLQDAGFKRLIVTAKHHD
GFCIWPSEYTEHDVASSPYKDGKGDILAEISKACTDLNMDMGCYLSPWDENAESYGYYDA
NGNPCSPEEDVLDYNEYYINQIKEITSNPIYGNNGRFVEWWMDGAKGTGADAQEYRMDDF
LATIREGEPGVQIFGGGNSGGIHWIGNENGIAPDETWAQRGEYWSVPECDVSLISGWFWH
PNYPAKSMEQMANIYFSSVGHGAPLLLNVPPNRDGRYDQAHASRIAEFGKAIEETFDEDL
TQKDGVTATASAVRGNAAQFDASKTIDGKEDTYWTMDDGQLTGSVTVNLGKEQTFDVVSI
EEYIELGQRISSFKVEYRSGNGEWKDFGSGKTISAKRLVRRSPVKADQVRVTITGSKAVP
LLRTIGVYKAGAGFEVSSPFPNDLTLIDNPSFDKNGTWYDESGSFVNNTSMWCNAGASAS
FTFTGTQAWIIGTIDPNHGIMTVQIDDMDPVDVNTQSSPRKLQQILYTTPVLENGPHTVT
MTCKTKALGLDAAYVLDNDGAGMFELEKANYSVNEGGTVDITINRVGGSKGEATLLISTP
PGKAVQGQYYVDINETLTFADGETSKTVTVETIDNNVKTGSLNFFFELTAATNAIIGFTP
RAEIIIIDDEMAQELQNAIAQADALIEAHYLPDSWATMLAAKAHAQNVLENSATMTETQI
NAATNGLLSAIQALVKRTNYTAEDPFMFPGRDDEAKLLEAEFFDMHPAVDDNKHVHVTNK
AEASNGQEVNWFMSDDSISVPYRALAAGTYTVTMTYRSGRLNESTANAVTWSGDNIVPGN
VKVFGESGATTYHTVSFDIEITKAGYSVLTIGSMQEGSVSEGPVIDKFEVAPKELELATY
YINATAGEGGSIEPSGEVPVEQFSSKTFTIKPDADHSLGTVKVNGKSVGSVDSYTFENIQ
GDATIEATFDKNIAKKAVIVTASNQHSATYSGDKAVDGNPDTRWATQDSVTKEAWLELSF
AEPVTVDTAYFSQLTGANNRTNAYNIEYWADGEWQVGYTGGSIGATATVRFEAFTADRIR
FHITDGFRPSFWEFQLFNEKRPSKTVQEVAEELTMANPDKGATKITMPAVPGGFAIELTA
TSNFNVIDTFGNINAPAEPTDVDLTFTVSKNGESASKTLTVTVLPNSIKGDNLSPTATNV
TASNFHSAPYSPDKATDGNASTRWATNDSVTTAWLMMEFDEPITIGSAYIKEMNNANNHI
DGYNIEYWVEDGTASDGENGHWEIAYTGGAVNGETNVSFASVTSNKIRLNLTKANRPSIY
EFQVYSETIVPPVEVADRTILNKVIEKATALKDSEEFANAISSVQESFLAALDEAIRVAN
TNTSTPEQVQNAWIALMTEIHKLGLQQGNKDLLREHYELYSQLDLDLYIDDDAKANFITA
LENAAAMLENNDAVQSEVDAVDNALVVAADALTKRGDKTTLQALVDQSAGFVEENYAKGW
AEFAEALEKANIVLDNANATQDDVNVAVDELLTAMLNLRFKADKTLLNNAIAAAEALDLS
GFSAESVEKFNASLAAAKATAADDSLSEEEQNVVDKALSDLNEAVKGLTNTNGTSANLEI
NGDGSIVKTTSGAKTGDSAPLALAVATLLLAGAAVSFGKKRRNK
>tr|A0A200PMN0|A0A200PMN0_9MAGN Glycoside hydrolase OS=Macleaya cordata OX=56857 GN=BVC80_8973g21 PE=4 SV=1
MAKVYWFSISAFVFLQLVEFAVPRWVSTTTTPPLPILPLPSATQLKWQQRELIMFLHFGV
NTFTDSEWGTGQEDPSIFNPTGLNAHQWMDVAANSGFSLVILTAKHHDGFCLWPSKYTDH
SVTCSPWKDGNGDVVQEFVDAAKIRGIDIGLYLSPWDRHDKRYGHEVEYNEYYLAQLQEL
LTRYGSVQEIWFDGAKGSNAPSMSYYFQDWFSIVKELQGSINIFSDAGPDVRWVGDENGY
AGSTCWSTINRTSLRIGEGSIVSYLNTGDPKGTDWVPPECDVSIRPGWFWHKSQKPKPLS
QLLNIYYNSVGRNCVLLLNVPPNTTGLISETDNRRLGEFRKAIDTIFSINLAEGNTIKAS
SQRGGRKTAEFGPENVLDDDHLWSYWTPEDDSKDGHWIEITGNEKGLEFNVIRIQEAIGL
GQRIKKHEIYIDGKQLVKGTTIGYKRLHRLEGGVVHARRVRILIKESRGPPLISSVGLHF
DPFWHPKGSSNKTLV
>tr|A0A200R5M2|A0A200R5M2_9MAGN Glycoside hydrolase OS=Macleaya cordata OX=56857 GN=BVC80_1835g404 PE=4 SV=1
MEMNSLQSTIKNIKFKEPISQNTHLIHLTLFLSFLSLSTPSSATPPSSSSSFPKPPPLPI
LPLPSASQLSWQLGDMALFLHFGTNTFTDSEWGTGHIDPSIFNPTKLDAHQWVRVAKDAG
FSRIIITVKHHDGFCLWPSAYTDYSVRSSPWKNGTGDILSELATAAREAGIGLGVYLSPW
DRHEASYGKTMEYNEFYMGQMTELLTRYGEIKEVWLDGAKGEGEKDMEYFFDCWFSLIHQ
LQPGAVIFSDAGPDTRWVGDEAGVAGFTCWSLFNRSSVTIGHTDAKYSSGGDPQGHDWVP
AECDVSIRPGWFWHASELPKSALTLLDIYYKSVGRNCLWLLNVPPNSSGLISDEDVQVLQ
EFTELRRTIFSHNLAMVAVSTASSTRGGIVESRFAPSNILEEGIFHYWAPEEDQSDWVIY
LDFGAPVSFNMIQIQEPIHMGQRVIEFHLEILTEGLWQTVVYGTTIGYRRLMRFPTVESQ
WLRLVIDKSRADPLISNLGIYLDPFSILNDAPSNASSTSYFNGSRVIQPTVHNHSSSTAI
>tr|C1F5H2|C1F5H2_ACIC5 Tat pathway signal sequence domain protein OS=Acidobacterium capsulatum (strain ATCC 51196 / DSM 11244 / JCM 7670 / NBRC 15755 / NCIMB 13165 / 161) OX=240015 GN=ACP_1347 PE=4 SV=1
MQRRKFLYGLGGGAFTAGLAGLPAELPLIRPFAARALGASAAPAARPTPGQVAWQNLEFG
MFVHLAPNTWQNLEGDNLSTPLSQIDPVDLNTDQWVETALSMGARYVVFVAKHQGGFCMW
QTHTTPYSIRNTPWRHGKGDVLRDISESCRKHGLPLGVYVSPRDQYFGAGIGGKCKTPAQ
QKKYNAIYREQLTEVFTRYGKLVEIWFDGSTVTPVGDLIHRYQPEAMVFQGPDATIRWVG
NENGFAPYPCWNALDKQDAATGTATALNSDPNGSVWMPVEADVSIRRPDWFWSTTNAGKV
LTLDQLLSIYYRSVGRGAQLLLNIPPNTRGLMAQPDCAVAKQFGDELRRRFSHPVARTRG
AGPLVEWKLAKPARIDTVILQEQISGGQRVRAYQLEGRAHGAWIPLGEGASIGHKRIQPV
PPHIVDAVRLRVTESQGDPMIRTLAVYDTGVAPPADWDAVSHLWAANLIGQWSGGSFSLD
LSSRIHAATQYVLRFRPESGKVTGFRNMILEIGGVPAPDLLKHSPAHPDELILDITGLDA
SIRIHGHVEGASSGSILFEKLR
>tr|A0A3D4VI48|A0A3D4VI48_9BACT Uncharacterized protein OS=Acidobacterium sp. OX=1872119 GN=DGA22_08045 PE=4 SV=1
MRSFPSGIGGIRKGHFMQRRKFLYGLGGGAFTAGLAGLPAELPLIRPFAARALGASAAPA
ARPTPGQVAWQNLEFGMFVHLAPNTWQNLEGDNLSTPLSQIDPVDLNTDQWVETALSMGA
RYVVFVAKHQGGFCMWQTHTTPYSIRNTPWRHGKGDVLRDISESCRKHGLPLGVYVSPRD
QYFGAGIGGKCKTPAQQKKYNAIYREQLTEVFTRYGKLVEIWFDGSTVTPVGDLIHRYQP
EAMVFQGPDATIRWVGNENGFAPYPCWNALDKQDAATGTATALNSDPNGSVWMPVEADVS
IRRPDWFWSTTNAGKVLTLDQLLSIYYRSVGRGAQLLLNIPPNTRGLMAQPDCAVAKQFG
DELRRRFSHPVARTRGAGPLVEWKLAKPARIDTVILQEQISGGQRVRAYQLEGRAHGAWI
PLGEGASIGHKRIQPVPPHIVDAVRLRVTESQGDPMIRTLAVYDTGVAPPADWDAVSHLW
AANLIGQWSGGSFSLDLSSRIHAATQYVLRFRPESGKVTGFRNMILEIGGVPAPDLLKHS
PAHPDELILDITGLDASIRIHGHVEGASSGSILFEKLR
>tr|C2FTL6|C2FTL6_9SPHI F5/8 type C domain protein OS=Sphingobacterium spiritivorum ATCC 33300 OX=525372 GN=HMPREF0765_0672 PE=4 SV=1
MAMIFSDVGPDMRWVGNEHGFAAETSWATITPKSLDGKKPVPGVVDDSNLPTGDRDGKYW
IPAECDVPQRPGWFYHADQNDRVKTPNQLFEIYLKSVGRGANMNLGLAPMPSGQLHENDV
RSLAAFGKKITETFRQNLTQGAKLKASNIRGKAKLFKPENVLDNDRYSYWATEDNVHNPT
LEIELQGEKEFNLIRLRENIKLGQRLDSVFIEVWTQNKWTPLARATSIGSTRLIKLDKPV
KAGKLRLHLYAPVAPALSDFGLFKEFDEPFTLSADAVKTLSATQYSVEPKAGLEKAFDGN
PHTFSVTKDADKGIIFEVNATLSGLGYLPRQDASTEGLPTKYEVYASDNKKDWKLILSGE
FANIKANPILQKIFFDKPVNTKYLKFMPKETIGNTFSAAGFELYTP
>tr|C3QAN0|C3QAN0_9BACE F5/8 type C domain protein OS=Bacteroides sp. D1 OX=556258 GN=BSAG_00724 PE=4 SV=2
MSCKLSFTLLCIAMLASCISTKMDPPQPYGVLPTDRQLAWHEMEMYNMIEFNQNNALDIH
WGWGNESPELVNPVDFDAEKIVLLAKKIGSKGFLINAKHHGGFCMWPTKTTDYNISKSPW
KDGKGDWVGEWAKACRQHGLKLGLYLSPWDRNAACFGTPEYLKMYKEQLTELCTNYGELF
TLWFDGAPGAGGSGYYGGANEYRGGFIEYYDWDNIYAIVRELQPNAVIFNDPGPDIRWVG
NEDGYAGRYKKTCWATLFPEGNWNMRPRPNSDGERIKMLNEGQRHGKYWIPAECDFSLKR
RFAYHTTDSLTTKSPQKLFDIYLASVGLGQGFDMCLPLTPKGVMEWRDVKSLEGFAELMN
KTFSKNFIKGARLVPSNVRGNITRHYGTAKLTDNDRYSYWATDDTVTNASLMIELPKKQV
FNLIKVRENIKLGQRIDSMKVDAWVDGGWKEIAEATSIGACRIIRLENDLNTDRIRLRFF
APVALAVSEVSLFKEPDNLEAPKIYRKKDGMVSIRTDRPVISIRYTTDGTEPSFTSNEYK
EPFLFDKQGVVRAAVFTSDKKSGEITSVIFDQCKKNWKIISPVKSGVDNMIDDNVESYFH
TYDAGNKKEFVPDEVIVDMGTTIPVSEIIYTPRQDMYRNVDGVIENYEIYLSEDGLKWEM
ASKGVFQNIRQTLVPQEIKLNKVYRSRYLKFVVNGVLEKNFISVAEIGVRTVD
>tr|A0A139KTE9|A0A139KTE9_BACOV F5/8 type C domain protein OS=Bacteroides ovatus OX=28116 GN=HMPREF2532_04235 PE=4 SV=1
MDPPQPYGVLPTDRQLAWHEMEMYNMIEFNQNNALDIHWGWGNESPELVNPVDFDAEKIV
LLAKKIGSKGFLINAKHHGGFCMWPTKTTDYNISKSPWKDGKGDWVGEWAKACRQHGLKL
GLYLSPWDRNAACFGTPEYLKMYKEQLTELCTNYGELFTLWFDGAPGAGGSGYYGGANEY
RGGFIEYYDWDNIYAIVRELQPNAVIFNDPGPDIRWVGNEDGYAGRYKKTCWATLFPEGN
WNMRPRPNSDGERIKMLNEGQRHGKYWIPAECDFSLKRRFAYHTTDSLTTKSPQKLFDIY
LASVGLGQGFDMCLPLTPKGVMEWRDVKSLEGFAELMNKTFSKNFIKGARLVPSNVRGNI
TRHYGTAKLTDNDRYSYWATDDTVTNASLMIELPKKQVFNLIKVRENIKLGQRIDSMKVD
AWVDGGWKEIAEATSIGACRIIRLENDLNTDRIRLRFFAPVALAVSEVSLFKEPDNLEAP
KIYRKKDGMVSIRTDRPVISIRYTTDGTEPSFTSNEYKEPFLFDKQGVVRAAVFTSDKKS
GEITSVIFDQCKKNWKIISPVKSGVDNMIDDNVESYFHTYDAGNKKEFVPDEVIVDMGTT
IPVSEIIYTPRQDMYRNVDGVIENYEIYLSEDGLKWEMASKGVFQNIRQTLVPQEIKLNK
VYRSRYLKFVVNGVLEKNFISVAEIGVRTVD
>tr|A0A1C5P3B2|A0A1C5P3B2_9BACE Alpha-L-fucosidase OS=uncultured Bacteroides sp. OX=162156 GN=SAMEA3545269_01088 PE=4 SV=1
MSCKLSFTLLCIAMLASCISTKMDPPQPYGVLPTDRQLAWHEMEMYNMIEFNQNNALDIH
WGWGNESPELVNPVDFDAEKIVLLAKKIGSKGFLINAKHHGGFCMWPTKTTDYNISKSPW
KDGKGDWVGEWAKACRQHGLKLGLYLSPWDRNAACFGTPEYLKMYKEQLTELCTNYGELF
TLWFDGAPGAGGSGYYGGANEYRGGFIEYYDWDNIYAIVRELQPNAVIFNDPGPDIRWVG
NEDGYAGRYKKTCWATLFPEGNWNMRPRPNSDGERIKMLNEGQRHGKYWIPAECDFSLKR
RFAYHTTDSLTTKSPQKLFDIYLASVGLGQGFDMCLPLTPKGVMEWRDVKSLEGFAELMN
KTFSKNFIKGARLVPSNVRGNITRHYGTAKLTDNDRYSYWATDDTVTNASLMIELPKKQV
FNLIKVRENIKLGQRIDSMKVDAWVDGGWKEIAEATSIGACRIIRLENDLNTDRIRLRFF
APVALAVSEVSLFKEPDNLEAPKIYRKKDGMVSIRTDRPVISIRYTTDGTEPSFTSNEYK
EPFLFDKQGVVRAAVFTSDKKSGEITSVIFDQCKKNWKIISPVKSGVDNMIDDNVESYFH
TYDAGNKKEFVPDEVIVDMGTTIPVSEIIYTPRQDMYRNVDGVIENYEIYLSEDGLKWEM
ASKGVFQNIRQTLVPQEIKLNKVYRSRYLKFVVNGVLEKNFISVAEIGVRTVD
>tr|A0A1H3XKV7|A0A1H3XKV7_9BACE Alpha-L-fucosidase OS=Bacteroides xylanisolvens OX=371601 GN=SAMN04487924_101278 PE=4 SV=1
MSCKLSFTLLCIAMLASCISTKMDPPQPYGVLPTDRQLAWHEMEMYNMIEFNQNNALDIH
WGWGNESPELVNPVDFDAEKIVLLAKKIGSKGFLINAKHHGGFCMWPTKTTDYNISKSPW
KDGKGDWVGEWAKACRQHGLKLGLYLSPWDRNAACFGTPEYLKMYKEQLTELCTNYGELF
TLWFDGAPGAGGSGYYGGANEYRGGFIEYYDWDNIYAIVRELQPNAVIFNDPGPDIRWVG
NEDGYAGRYKKTCWATLFPEGNWNMRPRPNSDGERIKMLNEGQRHGKYWIPAECDFSLKR
RFAYHTTDSLTTKSPQKLFDIYLASVGLGQGFDMCLPLTPKGVMEWRDVKSLEGFAELMN
KTFSKNFIKGARLVPSNVRGNITRHYGTAKLTDNDRYSYWATDDTVTNASLMIELPKKQV
FNLIKVRENIKLGQRIDSMKVDAWVDGGWKEIVEATSIGACRIIRLENDLNTDRIRLRFF
APVALAVSEVSLFKEPDNLEAPKIYRKKDGMVSIRTDRPVISIRYTTDGTEPSFTSNEYK
EPFLFDKQGVVRAAVFTSDKKSGEITSVIFDQCKKNWKIISPVKSGVDNMIDDNVESYFH
TYDAGNKKEFVPDEVIVDMGTTIPVSEIIYTPRQDMYRNVDGVIENYEIYLSEDGLKWEM
ASKGVFQNIRQTLVPQEIKLNKVYRSRYLKFVVNGVLEKNFISVAEIGVRTVD
>tr|A0A3A5QJ95|A0A3A5QJ95_9BACE Alpha-L-fucosidase OS=Bacteroides sp. AM54-2NS OX=2292955 GN=DXA05_10350 PE=4 SV=1
MSCKLSFTLLCIAMLASCISTKMDPPQPYGVLPTDRQLAWHEMEMYNMIEFNQNNALDIH
WGWGNESPELVNPVDFDAEKIVLLAKKIGSKGFLINAKHHGGFCMWPTKTTDYNISKSPW
KDGKGDWVGEWAKACRQHGLKLGLYLSPWDRNAACFGTPEYLKMYKEQLTELCTNYGELF
TLWFDGAPGAGGSGYYGGANEYRGGFIEYYDWDNIYAIVRELQPNAVIFNDPGPDIRWVG
NEDGYAGRYKKTCWATLFPEGNWNMRPRPNSDGERIKMLNEGQRHGKYWIPAECDFSLKR
RFAYHTTDSLTTKSPQKLFDIYLASVGLGQGFDMCLPLTPKGVMEWRDVKSLEGFAELMN
KTFSKNFIKGARLVPSNVRGNITRHYGTAKLTDNDRYSYWATDDTVTNASLMIELPKKQV
FNLIKVRENIKLGQRIDSMKVDAWVDGGWKEIAEATSIGACRIIRLENDLNTDRIRLRFF
APVALAVSEVSLFKEPDNLEAPKIYRKKDGMVSIRTDRPVISIRYTTDGTEPSFTSNEYK
EPFLFDKQGVVRAAVFTSDKKSGEITSVIFDQCKKNWKIISPVKSGVDNMIDDNVESYFH
TYDAGNKKEFVPDEVIVDMGTTIPVSEIIYTPRQDMYRNVDGVIENYEIYLSEDGLKWEM
ASKGVFQNIRQTLVPQEIKLNKVYRSRYLKFVVNGVLEKNFISVAEIGVRTVD
>tr|A0A415G0D7|A0A415G0D7_9BACE Alpha-L-fucosidase OS=Bacteroides xylanisolvens OX=371601 GN=DW075_03820 PE=4 SV=1
MSCKLSFTLLCIAMLASCISTKMDPPQPYGVLPTDRQLAWHEMEMYNMIEFNQNNALDIH
WGWGNESPELVNPVDFDAEKIVLLAKKIGSKGFLINAKHHGGFCMWPTKTTDYNISKSPW
KDGKGDWVGEWAKACRQHGLKLGLYLSPWDRNAACFGTPEYLKMYKEQLTELCTNYGELF
TLWFDGAPGAGGSGYYGGANEYRGGFIEYYDWDNIYAIVRELQPNAVIFNDPGPDIRWVG
NEDGYAGRYKKTCWATLFPEGNWNMRPRPNSDGERIKMLNEGQRHGKYWIPAECDFSLKR
RFAYHTTDSLTTKSPQKLFDIYLASVGLGQGFDMCLPLTPKGVMEWRDVKSLEGFAELMN
KTFSKNFIKGARLVPSNVRGNITRHYGTAKLTDNDRYSYWATDDTVTNASLMIELPKKQV
FNLIKVRENIKLGQRIDSMKVDAWVDGGWKEIAEATSIGACRIIRLENDLNTDRIRLRFF
APVALAVSEVSLFKEPDNLEAPKIYRKKDGMVSIRTDRPVISIRYTTDGTEPSFTSNEYK
EPFLFDKQGVVRAAVFTSDKKSGEITSVIFDQCKKNWKIISPVKSGVDNMIDDNVESYFH
TYDAGNKKEFVPDEVIVDMGTTIPVSEIIYTPRQDMYRNVDGVIENYEIYLSEDGLKWEM
ASKGVFQNIRQTLVPQEIKLNKVYRSRYLKFVVNGVLEKNFISVAEIGVRTVD
>tr|D0TKZ5|D0TKZ5_9BACE F5/8 type C domain protein OS=Bacteroides sp. 2_1_22 OX=469588 GN=HMPREF0102_00971 PE=4 SV=1
MLCIAMLASCISTKMDPPQPYGVLPTDRQLAWHEMEMYNMIEFNQNNALDIHWGWGNESP
ELVNPVDFDAEKIVLLAKKIGSKGFLINAKHHGGFCMWPTKTTDYNISKSPWKDGKGDWV
GEWAKACRQHGLKLGLYLSPWDRNAACFGTPEYLKMYKEQLTELCTNYGELFTLWFDGAP
GAGGSGYYGGANEYRGGFIEYYDWDNIYAIVRELQPNAVIFNDPGPDIRWVGNEDGYAGR
YKKTCWATLFPEGNWNMRPRPNSDGERIKMLNEGQRHGKYWIPAECDFSLKRRFAYHTTD
SLTTKSPQKLFDIYLASVGLGQGFDMCLPLTPKGVMEWRDVKSLEGFAELMNKTFSKNFI
KGARLVPSNVRGNITRHYGTAKLTDNDRYSYWATDDTVTNASLMIELPKKQVFNLIKVRE
NIKLGQRIDSMKVDAWVDGGWKEIAEATSIGACRIIRLENDLNTDRIRLRFFAPVALAVS
EVSLFKEPDNLEAPKIYRKKDGMVSIRTDRPVISIRYTTDGTEPSFTSNEYKEPFLFDKQ
GVVRAAVFTSDKKSGEITSVIFDQCKKNWKIISPVKSGVDNMIDDNVESYFHTYDAGNKK
EFVPDEVIVDMGTTIPVSEIIYTPRQDMYRNVDGVIENYEIYLSEDGLKWEMASKGVFQN
IRQTLVPQEIKLNKVYRSRYLKFVVNGVLEKNFISVAEIGVRTVD
>tr|D6CY18|D6CY18_9BACE Alpha-L-fucosidase OS=Bacteroides xylanisolvens XB1A OX=657309 GN=BXY_19830 PE=4 SV=1
MDPPQPYGVLPTDRQLAWHEMEMYNMIEFNQNNALDIHWGWGNESPELVNPVDFDAEKIV
LLAKKIGSKGFLINAKHHGGFCMWPTKTTDYNISKSPWKDGKGDWVGEWAKACRQHGLKL
GLYLSPWDRNAACFGTPEYLKMYKEQLTELCTNYGELFTLWFDGAPGAGGSGYYGGANEY
RGGFIEYYDWDNIYAIVRELQPNAVIFNDPGPDIRWVGNEDGYAGRYKKTCWATLFPEGN
WNMRPRPNSDGERIKMLNEGQRHGKYWIPAECDFSLKRRFAYHTTDSLTTKSPQKLFDIY
LASVGLGQGFDMCLPLTPKGVMEWRDVKSLEGFAELMNKTFSKNFIKGARLVPSNVRGNI
TRHYGTAKLTDNDRYSYWATDDTVTNASLMIELPKKQVFNLIKVRENIKLGQRIDSMKVD
AWVDGGWKEIAEATSIGACRIIRLENDLNTDRIRLRFFAPVALAVSEVSLFKEPDNLEAP
KIYRKKDGMVSIRTDRPVISIRYTTDGTEPSFTSNEYKEPFLFDKQGVVRAAVFTSDKKS
GEITSVIFDQCKKNWKIISPVKSGVDNMIDDNVESYFHTYDAGNKKEFVPDEVIVDMGTT
IPVSEIIYTPRQDMYRNVDGVIENYEIYLSEDGLKWEMASKGVFQNIRQTLVPQEIKLNK
VYRSRYLKFVVNGVLEKNFISVAEIGVRTVD
>tr|I8Y1H7|I8Y1H7_BACOV Uncharacterized protein OS=Bacteroides ovatus CL02T12C04 OX=997885 GN=HMPREF1069_05321 PE=4 SV=1
MSCKLSFTLLCIAMLASCISTKMDPPQPYGVLPTDRQLAWHEMEMYNMIEFNQNNALDIH
WGWGNESPELVNPVDFDAEKIVLLAKKIGSKGFLINAKHHGGFCMWPTKTTDYNISKSPW
KDGKGDWVGEWAKACRQHGLKLGLYLSPWDRNAACFGTPEYLKMYKEQLTELCTNYGELF
TLWFDGAPGAGGSGYYGGANEYRGGFIEYYDWDNIYAIVRELQPNAVIFNDPGPDIRWVG
NEDGYAGRYKKTCWATLFPEGNWNMRPRPNSDGERIKMLNEGQRHGKYWIPAECDFSLKR
RFAYHTTDSLTTKSPQKLFDIYLASVGLGQGFDMCLPLTPKGVMEWRDVKSLEGFAELMN
KTFSKNFIKGARLVPSNVRGNITRHYGTAKLTDNDRYSYWATDDTVTNASLMIELPKKQV
FNLIKVRENIKLGQRIDSMKVDAWVDGGWKEIAEATSIGACRIIRLENDLNTDRIRLRFF
APVALAVSEVSLFKEPDNLEAPKIYRKKDGMVSIRTDRPVISIRYTTDGTEPSFTSNEYK
EPFLFDKQGVVRAAVFTSDKKSGEITSVIFDQCKKNWKIISPVKSGVDNMIDDNVESYFH
TYDAGNKKEFVPDEVIVDMGTTIPVSEIIYTPRQDMYRNVDGVIENYEIYLSEDGLKWEM
ASKGVFQNIRQTLVPQEIKLNKVYRSRYLKFVVNGVLEKNFISVAEIGVRTVD
>tr|W6P3P0|W6P3P0_9BACE Alpha-L-fucosidase OS=Bacteroides xylanisolvens SD CC 1b OX=702447 GN=BN890_19130 PE=4 SV=1
MEMYNMIEFNQNNALDIHWGWGNESPELVNPVDFDAEKIVLLAKKIGSKGFLINAKHHGG
FCMWPTKTTDYNISKSPWKDGKGDWVGEWAKACRQHGPKLGLYLSPWDRNAACFGTPEYL
KMYKEQLTELCTNYGELFTLWFDGAPGAGGSGYYGGANEYRGGFIEYYDWDNIYAIVREL
QPNAVIFNDPGPDIRWVGNEDGYAGRYKKTCWATLFPEGNWNMRPRPNSDGERIKMLNEG
QRHGKYWIPAECDFSLKRRFAYHTTDSLTTKSPQKLFDIYLASVGLGQGFDMCLPLTPKG
VMEWRDVKSLEGFAELMNKTFSKNFIKGARLVPSNVRGNITRHYGTAKLTDNDRYSYWAT
DDTVTNASLMIELPKKQVFNLIKVRENIKLGQRIDSMKVDAWVDGGWKEIAEATSIGACR
IIRLENDLNTDRIRLRFFAPVALAVSEVSLFKEPDNLEAPKIYRKKDGMVSIRTDRPVIS
IRYTTDGTEPSFTSNEYKEPFLFDKQGVVRAAVFTSDKKSGEITSVIFDQCKKNWKIISP
VKSGVDNMIDDNVESYFHTYDAGNKKEFVPDEVIVDMGTTIPVSEIIYTPRQDMYRNVDG
VIENYEIYLSEDGLKWEMASKGVFQNIRQTLVPQEIKLNKVYRSRYLKFVVNGVLEKNFI
SVAEIGVRTVD
>tr|C3QNJ6|C3QNJ6_9BACE F5/8 type C domain protein OS=Bacteroides sp. 2_2_4 OX=469590 GN=BSCG_00455 PE=4 SV=1
MGRFLPNHPRLQPKAVMAIMGDDVRWVGNEKGVGRETEWNATVLTPGIYARSQENNKRLG
VFSKAEDLGSRKILEKATELFWYPSEVDVSIRPGWFYHAEEDGKVKSLKHLSDIYFQSVG
YNSVLLLNIPPDRRGLIHEADIKRLKEFADYRQQTFADNRVKNGRKYWSTTSGGEAVYAL
KSKSEINLVMLQEDITKGQRVEAFTVEALMDNGWKEVGKGTTIGYKRMLRFPAVNANKLR
VRIDECRLTAYVSQVAAYYAEPLQEETTKEDWNNLPRSGWKQVAASPLTIDLGKTVTLSS
FTYAPSKAEAKPTMAFRYQFFVSMDGKSWKEVPASGEFSNIMHNPLPQTVAFSQKVQARF
IKLEATTPDATVAKVNMNEIGVMVIP
>tr|A0A209DPD4|A0A209DPD4_9BACL Alpha-fucosidase OS=Saccharibacillus sp. O16 OX=1978120 GN=B9G55_04415 PE=4 SV=1
MGISIREAAQIVPSARQLAWQELEFYGFIHFTVNTFSNREWGDGSESPAIFAPSALDARQ
WARAARDAGMSGLILTCKHHDGFCLWPSLYTDHSVRSSPWRGGQGDLVRETAEACREYGL
KWGIYLSPWDRHEPSYGDSEAYNDFFVHQLEELLTGYGEIFSVWFDGACGEGPNGKRQVY
DWERYYATIRRHQPRAVISVCGPDVRWCGNEAGHTRSSEWSVVPASLQDNEKIQANSQTE
DDGRFAARINSDEDDLGSRGMIARANELIWYPAEVNTSIRPGWFYHPEEDDQVKRADVLL
ELYERIVGGNSCFLLNLPPDQRGLIHEHDVAQLEELGRWIAATYDSRRDQAAAAVLTVSS
CQPEHEGERMLDGNPDSWWEAEEDAEQAVIELEWEKDCTFDRIVLMEQISTGQRIEAFTI
EGEKGDGSAVLLLEGTVVGHKWIGRLEKPETVRRLRVTIEQSRWNPTLRHLGVYLSAKT
>tr|C4J251|C4J251_MAIZE Alpha-L-fucosidase 1 OS=Zea mays OX=4577 GN=ZEAMMB73_Zm00001d021197 PE=2 SV=1
MASPLLCLAAAALAVAVLVSATEAWRATPPPLPVLPIPSAPQLRWQRREVIMFFHFGMNT
FTDSEWGTGSEDPSLFRPAGLNATQWMDAARAAGASLVILVAKHHDGFCLWPSDYTAHSV
RASPWRGGRGDVVREFVGAARARGLDAGLYLSPWDRHDQRYGEEVAYNEYYEAQLHELLT
GYGSVSEIWFDGAKGKNATNMTYHFQEWFQTVKQLQRSINIFSDDGPDVRWVGDEKGYAG
TTCWSTVNRSMITIGEAGIEKYLNAGDPRGRDWVPPECDVSIRPGWFWHKNETAKPLSQL
LEIYYNSVGRNCVLLLNAPPNSTGLVEDADIARLREFGAAVATVFGTDLAAGSEARASSE
RGARFAARNVMDGRDDTYWAPTAEDGRRNGYWIELRRRPGARARAFNVVRIQEHVALGQR
VERHAVYVDGAPVANGTTVGHKRLHRLPCPVAGTTVRVWITALRGPPLLSAVGLHYDPFV
ASDTM
>tr|A0A3L6DZG8|A0A3L6DZG8_MAIZE Alpha-L-fucosidase 1 OS=Zea mays OX=4577 GN=FUC1_0 PE=4 SV=1
MASPLLCLAAAALAVAVLVSATEAWRATPPPLPVLPIPSAPQLRWQRREVIMFFHFGMNT
FTDSEWGTGSEDPSLFRPAGLNATQWMDAARAAGASLVILVAKHHDGFCLWPSDYTAHSV
RASPWRGGRGDVVREFVGAARARGLDAGLYLSPWDRHDQRYGEEVAYNEYYEAQLHELLT
GYGSVSEIWFDGAKGKNATNMTYHFQEWFQTVKQLQRSINIFSDDGPDVRWVGDEKGYAG
TTCWSTVNRSMITIGEAGIEKYLNAGDPRGRDWVPPECDVSIRPGWFWHKNETAKPLSQL
LEIYYNSVGRNCVLLLNAPPNSTGLVEDADIARLREFGAAVATVFGTDLAAGSEARASSE
RGARFAARNVMDGRDDTYWAPTAEDGRRNGYWIELRRRPGARARAFNVVRIQEHVALGQR
VERHAVYVDGAPVANGTTVGHKRLHRLPCPVAGTTVRVWITALRGPPLLSAVGLHYDPFV
ASDTM
>tr|B6U1Y8|B6U1Y8_MAIZE Alpha-L-fucosidase 1 OS=Zea mays OX=4577 PE=2 SV=1
MASPLLCLAAAALAVAVLVSATEAWRATPPPLPVLPIPSAPQLRWQRREVIMFFHFGMNT
FTDSEWGTGSEDPSLFRPAGLNATQWMDAARAAGASLVILVAKHHDGFCLWPSDYTAHSV
RASPWRGGRGDVVREFVGAARARGLDAGLYLSPWDRHDQRYGEEVAYNEYYEAQLHELLT
GYGSVSEIWFDGAKGKNATNMTYHFQEWFQTVKQLQRSINIFSDDGPDVRWVGDEKGYAG
TTCWSTVNRSMITIGEAGIEKYLNAGDPRGRDWVPPECDVSIRPGWFWHKNETAKPLSQL
LEIYYNSVGRNCVLLLNAPPNSTGLVEDADIARLREFGAAVATVFGTDLAAGSEARASSE
RGARFAARNVMDGRDDTYWAPMAEDGRRNGYWIELRRRPGARARAFNVVRIQEHVALGQR
VERHAVYVDGAPVANGTTVGHKRLHRLPCPVAGTTVRVWITALRGPPLLSAVGLHYDPFV
ASDTM
>tr|C5X5H5|C5X5H5_SORBI Uncharacterized protein OS=Sorghum bicolor OX=4558 GN=SORBI_3002G268200 PE=4 SV=2
MHARAARGRARQGKAKRQASHAPVTTTPPERSRRAPSAASSSPESHSISKRAQTHPASPP
PPPFRPAYIATHTLAHREHTSIDDDTMASSLLCLAALAVVSVLVTTTEALPPRATPPPLP
VLPIPSAPQLKWQRREVIMFFHFGMNTFTDSEWGTGSEAPSLFRPAALNATQWMDAARAA
GASLAILVAKHHDGFCLWPSQYTAHSVRASPWRGGRGDVVREFVDAARARGVDAGLYLSP
WDRHDERYGNEVAYNEYYEAQLHELLTGYGSVSEIWFDGAKGKNATNMTYHFQEWFQTVK
QLQRSINIFSDDGPDVRWVGDEKGYAGTTCWSTVNRSMITIGEAGIEKYLNEGDPRGRDW
VPPECDVSIRPGWFWHKNETAKPLSQLLEIYYNSVGRNCVLLLNAPPNTTGLVQDADIAR
LREFGAAVSTIFGTDLAAGSEARASSERGAGFAARNVVDGRDDTYWAPAPATAGEDDGYY
WIELRRPGARAFNVVRIQEHVALGQRVERHAVYVDGAPVANGTTVGHKRLHRLPSAVVAG
TTVRVWIEARRGPPLLSAVGLHYDPFAAADTM
>tr|A0A010RQU2|A0A010RQU2_9PEZI Alpha-L-fucosidase 1 OS=Colletotrichum fioriniae PJ7 OX=1445577 GN=CFIO01_13062 PE=4 SV=1
MSFLYREMLLVIVACLMLAIDQANGQVTAPPVAYLQVPVQRQLDWHRMEYYAFIHFGPNT
FTDEEWGRSQQTPDIFNPTALDTDQWAKSFADAGMSGMILTAKHHDGMALWNTSTTNYKI
ANGGWARNRTAAGLQADVVRMAATSAQKYNLKFGVYLSPWDIHRDPAMPKPLLNGTIYDE
PQIFGDDTAGDYNDLYRRQLTELVNITLEDGSPASLFEIWLDGASGSSTLQTFDWAGFRD
IIRTHQPAAVMWGHQGVDARWVGNEDGITVPTNWHTISRTQDQDRLSEIDLQTGLRDGLY
WTPAEADARVRSGWFWHANEQPKTEQQLLDMYLQSVGRSVSLLLDVPPDTTGQITQEDIN
VLMEFKSLRDVFLGRNLIIPESIVTASSVRGGVNFTTFGPANMLTSSPDTYWTMDDEERT
GWVEIDLGGPVLVDAFVVQEHIALGQRVGGYAIDCIVDGAFKTVVNGTSLGYKRIDRLET
AVETSRVRFQVTQANAVPLIQSMQVLGTRTS
>tr|A0A014LVW3|A0A014LVW3_9ACTN Alpha-L-fucosidase OS=Streptomyces sp. PRh5 OX=1158056 GN=Z951_00310 PE=4 SV=1
MDTAIEIRSMPIGDLEGTMARPLDGTPGTRGTRGTRGTRGTRGTRGRRRALLALRALALA
ALAAAAVPPAPAEAAAQAPGRAAARAGCEGPITPAPQQIVEDCDTPARIIDKAAHTVPTP
GQRTWQQREITAFTHFGMNTMTGRQWGSGAEDEKLFDPPELAMDQWMRAYKAAGAKQVML
TAKHHDGFVLYPSRYTDHDVEASPWWTKGPGGRNPDGDVLGAYVKAARKAGLKVGVYLSP
ADGAELPHAWHAQWVEKIREKQQNGEELSLPERMALEDGDRAPAGQGRYGNGSKPTERTI
PTLVPGDDRTDKVASGALPSFRFAADDYDAYYLNQIYEILTQYGPVDEFWLDGANPWGGA
GVTQHYNVRNWFELIHALSPNSVIFQGAQGVRWVGNEDGVARETEWSVTPSAVDPWTVIG
GGLPNDSTDADIGSRAKLTAPGVRYLQWYPAEADVSIRPGWFHDPAERPKTPDQLMSLYE
RSVGRNASLLLNAGPAKNGRIDDADMASLTAFGKAVRTTYGTGSRPTTGHPVTFDRVRLG
EDIRQGQRVEEFAVQARVAGTWRDIASGTTIGARRILPLAAPVTADGLRIRVLASRAAPR
LLPPTVHLSEAGRR
>tr|A0A060ZVI1|A0A060ZVI1_9ACTN Glycoside hydrolase family 29 (Alpha-L-fucosidase) OS=Streptomyces iranensis OX=576784 GN=SIRAN6415 PE=4 SV=1
MPIGDLEGTMARPLAGTPGTHRTRGRRRALLALRVLALAALAAAAVPPAPAEAAAQAPAR
VGCEGPVTPAPQQIVEDCDTPARIVDKAAHTIPTPGQRAWQQREITAFTHFGMNTMTGRQ
WGSGAEDEKLFDPPEIAMDQWMRAYKAAGARQVMLTAKHHDGFALYPSRYTDHDVEASPW
WTKGPGGRNPDGDVLGAYVKAARKAGLKVGVYLSPADGAELPHAWHARWVEKIREKQQNG
EELSLPERMALEDGDRAPAGQGRYGNGSKPTERTIPTLVPGDDRADKVASGALPTFRFAA
DDYDAYYLNQIYEILTQYGPIDEFWLDGANPWGGAGVTQHYNVRNWFELIHALSPDSVVF
QGAQGVRWVGNEDGIARETEWSVTPSTVDPWTVIGGGLPNDSTDADIGSRAKLTAPGVRY
LQWYPAEADVSIRPGWFHDPAERPKTPDQLMSLYERSVGRNASLLLNVPPTKNGRIDDAD
MASLTAFGKAVRTTYGTGSRPATGHPVTFDRVRLGEDIRQGQRVEEFTVQARVAGAWRDI
ASGTTIGARRILPLAAPVTADGLRIRVLASRAAPRLLPPTVHLSEAGRR
>tr|A0A1C5FHH9|A0A1C5FHH9_9ACTN Alpha-L-fucosidase OS=Streptomyces sp. MnatMP-M27 OX=1839768 GN=GA0115260_108155 PE=4 SV=1
MTRPRGGTPGTHRSRGRRRAPLALRALALAALAAAAVPPAPTEAAVRAGCEGPVTPAPQQ
TVEDCDTPARIVDKATHTVPTAGQRAWQRREVTAFTHFGMNTMTGRQWGSGAEDPKLFDP
PELDMDQWMRAYKAAGAEQVMLTAKHHDGFALYPSRYTDHDVAASPWWTNGPGGRNPDGD
VLGAYVKAARKAGLEVGVYLSPADGAELPHAWHARWVERIREKQQNGEELSLPERMALED
GDRAPAGQGRYGNGSEPTERTIPTLVPGDDRAEKVASGALPTFRFSADDYDAYYLDQIYE
ILTQYGPIDEFWLDGANPWSGAGVTQKYNVRNWFELIHALAPDAVVFQGAQGVRWVGNED
GVARETEWSVTPSAVDPWTVIGGGLPNDSTDADIGSRAKLTAPGVRHLQWYPAEADVSIR
PGWFHDPAERPKTPGQLMSLYEHSVGRNASLLLNVPPAKDGRIDDADVASLTAFGKAVRT
TYGSGARPAPGHPVTFDRVRLGEDIRQGQRVEEFTVRARVAGTWRDIASGTTIGARRILP
LAAPVTADGLRIRVLASRAAPRLLPPTVHLGAAGRR
>tr|A0A1H4N7F0|A0A1H4N7F0_STRMJ Alpha-L-fucosidase OS=Streptomyces melanosporofaciens OX=67327 GN=SAMN04490356_2155 PE=4 SV=1
MARPLGGTPGTHRPRGRRRALLALRALALAALAAAAAPPAPAQAATAQAAPAKGVARAEC
QGPVTPAPQQTVEDCDTPARIIDKAVHTVPTPGQRAWQKREITAFTHFGMNTMTGRQWGS
GAEDEKLFDPPELDMDQWMRAYKAAGAQQVMLTAKHHDGFVLYPSRYTDHDVEASPWWTN
GPGGRNPDGDVLGAYVKAARKAGLKVGVYLSPADGAELPHAWHAQWVEKIREKQQNGEEL
SLPERMALEDGDRAPAGQGRYGDGSKPTERTIPTLVPGDDRADKVASGALPSFRFTADDY
DAYYLNQIYEILTQYGPIDEFWLDGANPWGGAGVTQNYDVRNWFELIRALSPDAVVFQGA
QGVRWVGNEDGVARETEWSVTPSAVDPWTVVGGGLPNDSTDADIGSRAKLTAPGVRHLQW
YPAEADVSIRPGWFHDPAERPKTPGQLMSLYERSVGRNASLLLNVPPAKNGRIDDTDIAS
LTAFGKAVRTTYGTGARPATGHPVTFDRVRLGEDIRRGQRVEQFTVQARVAGAWRDIASG
TTIGARRILPLAAPVTADGLRVRVLASRAAPRLLPPTVHLGAAGRR
>tr|A0A1P8Y723|A0A1P8Y723_9ACTN Alpha-L-fucosidase OS=Streptomyces autolyticus OX=75293 GN=BV401_16810 PE=4 SV=1
MAALAAAAVPPAPTEAAVRAGCEGPVTPAPQQTVEDCDTPARIVDKAAHTVPTAGQRAWQ
RREITAFTHFGMNTMTGRQWGSGAEDPKLFDPPELDMDQWMRAYKAAGAEQVMLTAKHHD
GFALYPSRYTDHDVAASPWWTNGPGGRNPDGDVLGAYVKAARKAGLEVGVYLSPADGAEL
PHAWHARWVERIREKQQNGEELSLPERMALEDGDRAPAGQGRYGNGSEPTERTIPTLVPG
DDRAEKVASGALPTFRFSADDYDAYYLDQIYEILTQYGPIDEFWLDGANPWSGAGVTQKY
NVRNWFELIHALAPDAVVFQGAQGVRWVGNEDGVARETEWSVTPSAVDPWTVIGGGLPND
STDADIGSRAKLTAPGVRHLQWYPAEADVSIRPGWFHDPAERPKTPGQLMSLYERSVGRN
ASLLLNVPPAKDGRIDDADVASLTAFGKAVRTTYGSGARPAPGHPVTFDRVRLGEDIRQG
QRVEEFTVRARVAGTWRDIASGTTIGARRILPLAAPVTADGLRIRVLASRAAPRLLPPTV
HLGAAGRR
>tr|A0A1S6RIT5|A0A1S6RIT5_STRHY Alpha-L-fucosidase OS=Streptomyces hygroscopicus OX=1912 GN=SHXM_04282 PE=4 SV=1
MARPLGGTPGTHRPRGRRRALLALRALALAALAAVAVPPAPAQAAPAQAPGQTPAQAARA
GCQGPVTPAPQQTVEDCDTPARIIDKAVHTVPTPGQRAWQKREITAFTHFGMNTMTGRQW
GSGAEDEKLFDPPELDMDQWMRAYKAAGAQQVMLTAKHHDGFVLYPSRYTDHDVEASPWW
TNGPDGRNPDGDVLGAYVKAARKAGLKVGVYLSPADGAELPHAWHAQWVEKIREKQQNGE
ELSLPERMALEDGDRAPAGQGRYGNGSKPTERTIPTLVPGDDRADKVASGALPTFRFTAD
DYDAYYLNQIYEILTQYGPIDEFWLDGANPWGGAGVTQNYNVRNWFELIRALSPDAVVFQ
GAQGVRWVGNEDGIARETEWSVTPSAVDPWTVVGGGLPNDSTDADIGSRAKLTAPGVRHL
QWYPAEADVSIRPGWFHDPAERPKTPGQLMSLYERSVGRNASLLLNVPPAKNGRIDDTDI
ASLTAFGKAVRTTYGTGSRPATGHPVTFDRVRLGEDIREGQRVEEFTVQARVAGTWRDIA
SGTTIGARRILPLAAPVTADGLRVRVLASRAAPRLLPPTVHLSAAGRR
>tr|A0A2K8RAF3|A0A2K8RAF3_9ACTN Alpha-L-fucosidase OS=Streptomyces sp. M56 OX=1495638 GN=CFP59_05971 PE=4 SV=1
MARPRGGTPGTHRSRGRRRALLALRALALAALAAAAVPPAPTEAAVRAGCEGPVTPAPQQ
TVEDCDTPARIVDKAAHTVPTAGQRAWQRREITAFTHFGMNTMTGRQWGSGAEDPKLFDP
PELDMDQWMRAYKAAGAEQVMLTAKHHDGFALYPSRYTDHDVAASPWWTNGPGGRNPDGD
VLGAYVKAARKAGLEVGVYLSPADGAELPHAWHARWVERIREKQQNGEELSLPERMALED
GDRAPAGQGRYGNGSEPTERTIPTLVPGDDRAEKVASGALPTFRFSADDYDAYYLDQIYE
ILTQYGPIDEFWLDGANPWSGAGVTQKYNVRNWFELIHALAPDAVVFQGAQGVRWVGNED
GVARETEWSVTPSAVDPWTVIGGGLPNDSTDADIGSRAKLTAPGVRHLQWYPAEADVSIR
PGWFHDPAERPKTPGQLMSLYERSVGRNASLLLNVPPAKDGRIDDADVASLTAFGKAVRT
TYGSGARPAPGHPVTFDRVRLGEDIRQGQRVEEFTVRARVAGTWRDIASGTTIGARRILP
LAAPVTADGLRIRVLASRAAPRLLPPTVHLGAAGRR
>tr|A0A3L8RGW4|A0A3L8RGW4_STRRN Alpha-L-fucosidase OS=Streptomyces rapamycinicus (strain ATCC 29253 / DSM 41530 / NRRL 5491 / AYB-994) OX=1343740 GN=D3C57_111715 PE=4 SV=1
MDIAIEIRSMSIGELEGTMARPLAGTPGTHGTRGRRRVLLALRALALAALAAAAVPPAPA
EAAAQAAARAGCEGPVTPAPQQVVEDCDTPARIIDKAAHTVPTPGQRAWQQREITAFTHF
GMNTMTGRQWGSGAEDEKLFDPPELAMDQWMRAYKAAGARQVMLTAKHHDGFALYPSRYT
DHDVEASPWWTKGPGGRNPDGDVLGAYVKAARKAGLKVGVYLSPADGAELPHAWHAQWVE
KIREKQQNGEELSLPERMALEDGDRAPAGQGRYGNGSKPTERTIPTLVPGDDRAGKVASG
ALPTFRFAADDYDAYYLNQIYEILTQYGPIDEFWLDGANPWGGAGVTQHYNVRNWFELIH
ALSPKSVIFQGAQGVRWVGNEDGIARETEWSVTPSAVDPWTVIGGGLPNDSTDADIGSRA
KLTAPGVRYLQWYPAEADVSIRPGWFHDPAERPKTPDQLMSLYERSVGRNASLLLNVPPA
RNGRIDDADMASLTAFGKAVRTTYGTGSRPAPGHPVTFDRVRLGEDVRQGQRVEEFTVQA
RVAGTWRDIASGTTIGARRILPLAAPVTADGLRVRVLASRAAPRLLPPTVHLSEAGRR
>tr|G2NX06|G2NX06_STRVO Glycoside hydrolase family 29 (Alpha-L-fucosidase) OS=Streptomyces violaceusniger Tu 4113 OX=653045 GN=Strvi_7938 PE=4 SV=1
MARPLGGTPGTHRPRGRRRALLALRAFALAALAAAAVPPAPAQAAPAKAAPAQAAAGCQG
PVTPAPQQTVEDCDTPARIIDKAAHTVPTPGQRAWQKREITAFTHFGMNTMTGRQWGSGA
EDEKLFDPPELDMDQWMRAYKAAGAQQVMLTAKHHDGFVLYPSRYTDHDVEASPWWTNGP
GGRNPDGDVLGAYVKAARKAGLKVGVYLSPADGAELPHAWHAQWVEKIREKQQNGEELSL
PERMALEDGDRAPAGQGRYGNGSKPTERTIPTLVPGDDRADKVASGALPTFRFTADDYDA
YYLNQIYEILTQYGPIDEFWLDGANPWGGAGVTQNYNVRNWFELIRALSPDAVVFQGAQG
VRWVGNEDGIARETEWSVTPSAVDPWTVVGGGLPNDSTDADIGSRAKLTAPGVRHLQWYP
AEADVSIRPGWFHDPAERPKTPGRLMSLYERSVGRNASLLLNVPPAKNGRIDDTDFASLT
AFGTAVRTTYGTGARPATGHPVTFDRIRLGEDIRRGQRVEEFTVQARVAGTWRDIAAGTT
IGARRILPLAAPVTADGLRVRVLASRAAPQLLPPTVHLGAAGRR
>tr|C5C2L9|C5C2L9_BEUC1 Alpha-L-fucosidase OS=Beutenbergia cavernae (strain ATCC BAA-8 / DSM 12333 / NBRC 16432) OX=471853 GN=Bcav_1447 PE=4 SV=1
MSAATPVPTPEQLAWQRLEVGAFFHVGVNTFAGLEWSDGTLAPETFAPTDLDAGGWLDVA
VAGGARYAILTAKHHDGFCLWPTETTDYSVASSPWRGGDGDLVREFVDACRERGVLPGLY
LSPWDRHDPRYPDPAAYMDVYVAQLTELCTRYGPLVEIWFDGAGSEGYTYDWSRIMGVVR
EHQPQAMVFNMGTPTIRWVGNEDGLAADPVEYVVADTRTSNYTADTVGLARAAYLPPECD
VSVRRGWFWSADDEPKTLEHLLGIYYRSVGLGANLLLNVPPDARGRIDPADDAVVRAFGA
EVRRRFSTPVDLESSTSVDHLRLHEDLTHGQRVATHEIEARGAVVARGLTVGAGRLHVLA
EPVPARELRIRVTGQGAALAGVEAFATGHTSAPDVPADYRAPTERPDAVV
>tr|C6CXL9|C6CXL9_PAESJ Coagulation factor 5/8 type domain protein OS=Paenibacillus sp. (strain JDR-2) OX=324057 GN=Pjdr2_1772 PE=4 SV=1
MGVTIKEAAQIVPSSRQLAWQETEFYAFIHFTVNTFTDMEWGTGEESPGIFSPTELDARQ
WVKACQSAGMKGLILTCKHHDGFCLWPSQYTDHSVKSSPWKQGDGDVVKETAEACREAGL
KFGIYVSPWDRHEASYGDSERYNRYFVNQLTELLDGYGELFCVWFDGACGEGPNGKRQVY
DWDAYYEVIRRLQPGSVISVCGPDVRWCGNEAGHTRLVEWSVVPASLRDNEKIQANSQQT
DSGEFARRLGSEEEDLGSRKVLAETDRVVWYPAETNTSIRPGWFYHKHEDDKVKSVDELV
DLYERTVGGNSTFLLNLPPDRRGLIHEQDVSRLQELGRELKKRYRSNLASEANVTASASL
NEEHEGAKLTDGHLHTFWRTAEGTESATIELQWKNRITFDRVTLKEHIREGQRTERFYLE
WHDGADWHPLYEGQVIGYKKICRFEPVETDRIRIRITESRGYPTLREAGVYWTDMGDEHE
SEPGESEERKLFSP
>tr|A0A022Q8N2|A0A022Q8N2_ERYGU Uncharacterized protein OS=Erythranthe guttata OX=4155 GN=MIMGU_mgv1a005268mg PE=4 SV=1
MAEKSYNYLHIFTLLMLLSPLANSLKNHDRLKLATPPPLPILPLPSFSQLKWQQREIIMF
LHFGVNTFTDSEWGTGLESPSVFYPTGLDPTQWAHTAARAGISLMILTAKHHDGFCLWPS
KYTDHSVVRSPWNNGNGDVVREFVDAAKAHGIDAGLYLSPWDRHDTRYGHVELYNEYYLA
QLQELLTRYGGVREIWFDGAKGANATNMTYYFNDWFSMVKELQSTINIFSDAGPDIRWVG
NEKGYAGSTCWSTINATSLSIGNATILDYLNTGDPKGTNWLPAECDVSIRPGWFWHKSQA
PKKLSELLEIYYKSVGRNCLLLLNVPPNTTGLISESDVQRLSQLRRAIDTIFTSNSAVKC
SVEASSPRGGENGNFGPENVLDEDHLWTYWAPSENEKKDYWIEFRAKSSGIKFNVIRIQE
AIGLGQRIKKHEIYVDGIRVAKGSTVGYKRLHRLKMGVVHGNSVRIKIVKAKGIPLISSV
GFYFDPFWKPK
>tr|A0A022R9N6|A0A022R9N6_ERYGU Uncharacterized protein OS=Erythranthe guttata OX=4155 GN=MIMGU_mgv1a004219mg PE=4 SV=1
MVKETAIDNQQQPRRIFSTKPLKFSNPRSTKHIPIILLVIATICLKSQPSLSSSHPPPPP
PIPILPIPNSNQISWQLTEMAMFFHFGTNTFTDSEWGTGHADPSVFNPPSLNATQWVNAA
KDSGFSRVILTVKHHDGFCLWPSEYTDYSVKSSTWRNGTGDVLRELAAAAKIAGVQLGIY
LSPWDRHEPCYGKTYEYNEYYLGQMTELLTRYGEIREVFLDGAKGEGEKSMEYFFEDWFS
VIHQLQPRAVIFSDAGPDTRWVGDEGGVAGITCWSLFNRSDAKIGDTDTDYSIGGDPFGH
DWVPAECDVSIRPGWFWHPSESPKSALTLLDLYYKSVGRNCLLLLNVPPNSSGLISQQDI
QVLKEFSDLRNSIFTLNLAKNATISANSTRGKTGDSRYGPRNVLEEGIYSYWAPNRSISE
WILYLDFEEAVTFNVLLLQEPIQMGQRIIEFHLDFLNEGGEWEVVTGGTTVGYKRLLLFP
SVKASRLRVVIDESRADPLVSYLGIYFDPFSISGQVSKIFNGSEVLQQTTRRNSSTYYV
>tr|C6D1Z2|C6D1Z2_PAESJ Alpha-L-fucosidase OS=Paenibacillus sp. (strain JDR-2) OX=324057 GN=Pjdr2_5235 PE=4 SV=1
MHSSLNRPLPTEHQLLWQDFELGFFCHFGMNTFCDQEWGDGNDSPRLFHPAELDARQWVR
TAKRAGFRYFVLTAKHHDGFCLWPTLTTDYSVASSPWKEGHGDVVKECAEACREEGIGFG
LYLSPWDRHEPCYSDKAAYDDFYLRQLEELITGYGPLVEIWFDGAGSEGREYDWSRIMSL
VKQHQPGAMIFNMGAPTIRWVGNEDGVAPYPSWNTAESARVSMFSDASLNWLPETPSWVP
AECDVPIRKDRWFWHPDEEGLLLSLDSLMDIYYRSVGHGATLLLNVAPDNRGLLPDADVE
RVIAFGDEISRRLGKALAQTVDQEGQFIILGLEPNTVVEHVVIMEDIRYGECVRAYAIEA
WCSGEWQEIVRGSAIGHKKIDRIAPASIDGLRLRILESDDKPRIRSFTAYGSNE
>tr|A0A1I1XB32|A0A1I1XB32_9BACL Alpha-L-fucosidase OS=Paenibacillus catalpae OX=1045775 GN=SAMN05216378_2085 PE=4 SV=1
MHSFLNRPLPTEHQLLWQDFELGFFCHFGMNTFCDQEWGDGSDSPRIFNPTELDARQWVR
TAKRAGFRYFVLTAKHHDGFCLWPTLTTDYSVASSPWKEGDGDVVKECAEACREEGIGFG
LYLSPWDRHEPCYSDKAAYDDFYLRQLEELITGYGPLVEIWFDGAGSEGREYDWSRIMSL
VKQHQPGAMIFNMGAPTIRWVGNEDGVAPYPSWNTAESARVSMFSDASLNWLPETPGWVP
AECDVPIRKDRWFWHPDEEGLLLSLDSLMDIYYRSVGHGATLLLNVAPDNRGLLPDADVE
RVIAFGDEISRRLGKALAQTVDQEGQFIILGLEPNTVVEHVVIMEDIRYGECVRAYVIEA
WYSGEWNEIIRGSAIGHKKIDRIAPSSIDGLRLRILESDDKPKIRSFAVYGSNE
>tr|A0A023NSB9|A0A023NSB9_9GAMM Alpha-L-fucosidase OS=Dyella jiangningensis OX=1379159 GN=CH75_08650 PE=4 SV=1
MNRLHRSLLGAAMACAFLPATSVAQSASDIRPSPQQIHWQDLEFGVIVHFGTNTFLDREW
GDGTADPKVFNPDHVDTAQWARASRAAGARYMVMVAKHHDGFALFPTAQSDYSVKSSPWM
GGKGDLVKLASDAARAEGLEFGVYLSPWDRHEPRYHDPKAYDAYYQAQVEELAQHYGPLV
EWWLDGAGSAGHVYDFPRYIETLRTYQANAMVFADMGLFEYGDIRWVGQEDGYIRGENWN
VIDRHGYERWRPVEVDTPLHDLHWFWHPNDEGTLKSVAKLVDTWENSVGRGGQLMLGIAP
DRHGRLPDADVARLDAFGKALRERYGDASNLARHHVATDDNTEAALDGNKDTFWSAPAGS
RHATIEVDFGRPVTFDRTLAMEWLDDGQHVRKYAIEVFDGKGWRPVAGAEAIGHMKIDVF
PKVTAQRVRLNILSSVGDASIREFQVFNAAALPSR
>tr|A0A318E057|A0A318E057_9GAMM Alpha-L-fucosidase OS=Dyella sp. AtDHG13 OX=1938897 GN=BDW41_10231 PE=4 SV=1
MKRFARSLLGAAMALALSPMAAAQGTDDIRPSPQQIHWQDLEFGVIVHFGTNTFLDREWG
DGTADPKVFNPDHVDTAQWARASRAAGARYMVMVAKHHDGFALYPTAQSDYSVKNSPWMG
GKGDLVRMASDAARAAGLEFGIYLSPWDRHEPRYSQPKAYDAYYQAQVEELAQHYGPLVE
WWLDGAGSAGHVYDFPRYIETLRTYQANAMVFADMGLFEYGDIRWVGQEDGYIRGENWNV
IDRHGYRRWRPIEVDTPLHDLHWFWHPNDEATLKSVAKLVDTWENSVGRGGQLMLGIAPD
RHGRLPDADVARLEAFGKALRERYGDASNLARHHVATDENTEAALDGNKDTFWSAPADSR
HATLEVDFGHPVTFDRTLAMEWLDDGQHVRKYAIEVFDGKAWHAVAGAEAIGHMKIDVFP
KVTAQRVRLNILSSVGAASIREFQVFNAAPLSSP
>tr|A0A328PEK4|A0A328PEK4_9GAMM Alpha-L-fucosidase OS=Dyella jiangningensis OX=1379159 GN=CA260_10570 PE=4 SV=1
MKRFARSLLGAAIALTLLPTTSTAQAAADIKPSAQQVHWQDLEFGVIVHFGTNTFLDREW
GDGTADPRVFNPDHVDAAQWARASRAAGARYMVMVAKHHDGFALFPTAQSDYSVKSSPWM
GGKGDMVKLASDAARAEGLEFGVYLSPWDRHEPRYRDPKAYDAYYQAQVEELAQHYGPLV
EWWLDGAGSAGHVYDFPRYIETLRTYQANAMVFADMGLFEYGDIRWVGQEDGYIRGENWN
VIDRHGYERWRPVEVDTPLHDLHWFWHPNDEGTLKSVAKLVDTWENSVGRGGQLMLGIAP
DRHGRLPDADVARLEAFGKALRERYGDASNLARHHAAADENTEAALDGNKDTFWSTPAGA
RHATLEVDFGNPVTFDRTLAMEWLDDGQHVRKYAIEVFDGKAWRTVASAEAIGHMKIDVF
PKVTAQRVRLNILSSVGGASIREFQVFNASPLPSH
>tr|C6JEZ5|C6JEZ5_9FIRM Uncharacterized protein OS=Ruminococcus sp. 5_1_39BFAA OX=457412 GN=RSAG_02512 PE=4 SV=1
MPTDQELIKIVPSSRQLAYQATEFYAFFHFGMNTYTNREWGDGTETPQIFNPTEFVADQW
VSAAQNAGMKGVILTCKHHDGFCLWPTRYTSHSVVSSPWKNGRGDVVWEVSEACRRYGMK
FGIYLSPWDRNKPCYGSGKEYDDYYLAQLTELLTGYGDIFSVWLDGACGEGPNGKKQIYD
WKRYYECVRKYQPDACICVCGPDIRWCGNEAGDVRKSEWSVVPARTALAESVQERSQQTD
DKEFRMRRITSDMEDLGSRRALEGETNLIWYPAEVNTSIRPGWFYHPEEDDQVKSLEELI
YIYIGAVGGNATFLLNIPPMPNGLLHENDVKRLEEFGSWKKKSFTHNLMSTAHIFSENED
PTHPVSDLTDDTSETWFQPESSELPVEITICLDGSYNLGYLVLKEAVCYSQRVEKFEIFV
KEGEIWNSIYTGTVIGYKKIISVKGQKAQKVKIVLHDFRVLPLLSFVGIYPESL
>tr|A0A173XP51|A0A173XP51_9FIRM Alpha-L-fucosidase OS=Blautia wexlerae OX=418240 GN=ERS852478_00374 PE=4 SV=1
MPTDQELIKIVPSSRQLAYQATEFYAFFHFGMNTYTNREWGDGTETPQIFNPTEFVADQW
VSAAQNAGMKGVILTCKHHDGFCLWPTRYTSHSVVSSPWKNGRGDVVWEVSEACRRYGMK
FGIYLSPWDRNKPCYGSGKEYDDYYLAQLTELLTGYGDIFSVWLDGACGEGPNGKKQIYD
WKRYYECVRKYQPDACICVCGPDIRWCGNEAGDVRKSEWSVVPARTALAESVQERSQQTD
DKEFRMRRITSDMEDLGSRRALEGETNLIWYPAEVNTSIRPGWFYHPEEDDQVKSLEELI
YIYIGAVGGNATFLLNIPPMPNGLLHENDVKRLEEFGSWKKKSFTHNLMSTAHIFSENED
PTHPVSDLTDDTSETWFQPESSELPVEITICLDGSYNLGYLVLKEAVCYSQRVEKFEIFV
KEGEIWNSIYTGTVIGYKKIISVKGQKAQKVKIVLHDFRVLPLLSFVGIYPESL
>tr|A0A174EH09|A0A174EH09_9FIRM Alpha-L-fucosidase OS=Blautia obeum OX=40520 GN=ERS852476_02668 PE=4 SV=1
MPTDQELIKIVPSSRQLAYQATEFYAFFHFGMNTYTNREWGDGTETPQIFNPTEFVADQW
VSAAQNAGMKGVILTCKHHDGFCLWPTRYTSHSVVSSPWKNGRGDVVWEVSEACRRYGMK
FGIYLSPWDRNKPCYGSGKEYDDYYLAQLTELLTGYGDIFSVWLDGACGEGPNGKKQIYD
WKRYYECVRKYQPDACICVCGPDIRWCGNEAGDVRKSEWSVVPARTALAESVQERSQQTD
DKEFRMRRITSDMEDLGSRRALEGETNLIWYPAEVNTSIRPGWFYHPEEDDQVKSLEELI
YIYIGAVGGNATFLLNIPPMPNGLLHENDVKRLEEFGSWKKKSFTHNLMSTAHIFSENED
PTHPVSDLTDDTSETWFQPESSELPVEITICLDGSYNLGYLVLKEAVCYSQRVEKFEIFV
KEGEIWNSIYTGTVIGYKKIISVKGQKAQKVKIVLHDFRVLPLLSFVGIYPESL
>tr|A0A174MZZ5|A0A174MZZ5_9FIRM Alpha-L-fucosidase OS=Blautia wexlerae OX=418240 GN=ERS852523_01563 PE=4 SV=1
MPTDQELIKIVPSSRQLAYQATEFYAFFHFGMNTYTNREWGDGTETPQIFNPTEFIADQW
VSAAQNAGMKGVILTCKHHDGFCLWPTRYTSHSVVSSPWKNGRGDVVWEVSEACRRYGMK
FGIYLSPWDRNKPCYGSGKEYDDYYLAQLTELLTGYGDIFSVWLDGACGEGPNGKKQIYD
WKRYYECVRKYQPDACICVCGPDIRWCGNEAGDVRKSEWSVVPARTALAESVQERSQQTD
DKEFRMRRITSDMEDLGSRRALEGETNLIWYPAEVNTSIRPGWFYHPEEDDQVKSLEELI
YIYIGAVGGNATFLLNIPPMPNGLLHENDVKRLEEFGSWKKKSFTHNLMSTAHIFSENED
PTHPVSDLTDDTSETWFQPESSELPVEITICLDGSYNLGYLVLKEAVCYSQRVEKFEIFV
KEGEIWNSIYTGTVIGYKKIISVKGQKAQKMKIVLHDFRVLPLLSFVGIYPESL
>tr|A0A174PZ92|A0A174PZ92_9FIRM Alpha-L-fucosidase OS=[Ruminococcus] torques OX=33039 GN=ERS852530_00390 PE=4 SV=1
MPTDQELIKIVPSCRQIAYQATEFYAFFHFGMNTYTNREWGDGTENPQIFNPTEFDADQW
VTAAQNAGMKGVILTCKHHDGFCLWPTRYTSHSVAASPWKNGRGDVVREVSEACRRHGLK
FGIYLSPWDRNQPCYGSGKEYDDYYLAQLTELLTGYGDIFSVWLDGACGEGPNGKKQVYD
WNRYYECVRKYQPDACICVCGPDIRWCGNEAGDVRKSEWSVVPARTALAESVQERSQQTD
DEEFRMRRITSDMEDLGSRKALEGETDLIWYPAEVNTSIRPGWFYHPEEDDQVKSLEELV
HIYIGAVGGNATFLLNIPPMPNGLLHKNDVKRLEEFGSWKKKSFVHNLMSTAHVFSENED
PAHPASNLTKDTLEAWYQPESSELPVEITICLDDSYNLGYLVLKEAVCYSQRVEKYEVFV
KEGEIWNSIYTGTVIGYQKIIPVKGKKAREMKIVLHDFRVLPLLTFIGIYPENT
>tr|A0A174SWH4|A0A174SWH4_9FIRM Alpha-L-fucosidase OS=Blautia obeum OX=40520 GN=ERS852569_01615 PE=4 SV=1
MPTDQELIKIVPSSRQLAYQATEFYAFFHFGMNTYTNREWGDGTETPQIFNPTEFVADQW
VSAAQNAGMKGVILTCKHHDGFCLWPTRYTSHSVVSSPWKNGRGDVVWEVSEACRRYGMK
FGIYLSPWDRNKPCYGSGKEYDDYYLAQLTELLTGYGDIFSVWLDGACGEGPNGKKQLYD
WKRYYECVRKYQPDACICVCGPDIRWCGNEAGDVRKSEWSVVPARTALAESVQERSQQTD
DKEFRMRRITSDMEDLGSRRALEGETNLIWYPAEVNTSIRPGWFYHPEEDDQVKSLEELI
YIYIGAVGGNATFLLNIPPMPNGLLHENDVKRLEEFGSWKKKSFTHNLMSTAHIFSENED
PTHPVSDLTDDTSETWFQPESSELPVEITICLDGSYNLGYLVLKEAVCYSQRVEKFEIFV
KEGEIWNSIYTGTVIGYKKIISVKGQKAQKVKIVLHDFRVLPLLSFVGIYPESL
>tr|A0A1C5LW94|A0A1C5LW94_9FIRM Alpha-L-fucosidase OS=uncultured Blautia sp. OX=765821 GN=SAMEA3545252_00209 PE=4 SV=1
MPTDQELIKIVPSCRQISYQATEFYAFFHFGMNTYTNREWGDGTENLQIFNPTEFDADQW
VTAAQNAGMKGVILTCKHHDGFCLWPTRYTRHSVAASPWKNGRGDVVREVSEACRRHGLK
FGIYLSPWDRNQPCYGSGKEYDDYYLAQLTELLTGYGDIFSVWLDGACGEGPNGKKQVYD
WNRYYECVRKYQPDACICVCGPDIRWCGNEAGDVRKSEWSVVPARTALAESVQERSQQTD
DEEFRMRRITSDMEDLGSRKALEGETDLIWYPAEVNTSIRPGWFYHPEEDDQVKSLEELV
HIYIGAVGGNATFLLNIPPMPNGLLHKNDVKRLEEFGSWKKKSFAHNLMSTAHVFSENED
PAHPASNLTKDTLEAWYQPESSELPVEITICLDDSYNLGYLVLKEAVCYSQRVEKYEVFV
KEGEIWNSIYTGTVIGYQKIIPVKGKKAREMKIVLHDFRVLPLLTFIGIYPENT
>tr|A0A1C6AG99|A0A1C6AG99_9FIRM Alpha-L-fucosidase OS=uncultured Ruminococcus sp. OX=165186 GN=SAMEA3545373_01144 PE=4 SV=1
MPTDQELIKIVPSCRQIAYQATEFYAFFHFGMNTYTNREWGDGTENPQIFNPTEFDADQW
VTAAQNAGMKGVILTCKHHDGFCLWPTRYTSHSVAASPWKNGRGDVVREVSEACRRHGLK
FGIYLSPWDRNQPCYGSGKEYDDYYLAQLTELLTGYGDIFSVWLDGACGEGPNGKKQVYD
WNRYYECVRKYQPDACICVCGPDIRWCGNEAGDVRKSEWSVVPARTALAESVQERSQQTD
DEEFRMRRITSDMEDLGSRKALEGETDLIWYPAEVNTSIRPGWFYHPEEDDQVKSLEELV
HIYIGAVGGNATFLLNIPPMPNGLLHKNDVKRLEEFGSWKKKSFVHNLMSTAHVFSENED
PAHPASNLTKDTLEAWYQPESSELPVEITICLDDSYNLGYLVLKEAVCYSQRVEKYEVFV
KEGEIWNSIYTGTVIGYQKIIPVKGKKAREMKIVLHDFRVLPLLTFIGIYPENT
>tr|A0A1C6I4C7|A0A1C6I4C7_9FIRM Alpha-L-fucosidase OS=uncultured Blautia sp. OX=765821 GN=SAMEA3545421_01703 PE=4 SV=1
MPTDQELIKIVPSCRQIAYQATEFYAFFHFGMNTYTNREWGDGTENPQIFNPTEFDADQW
VTAAQNAGMKGVILTCKHHDGFCLWPTRYTSHSVAASPWKNGRGDVVREVSEACRRHGLK
FGIYLSPWDRNQPCYGMGKEYDDYYLSQLTELLTRYGEIFSVWLDGACGEGPNGKKQVYD
WNRYYECVRKYQPDACICVCGPDIRWCGNEAGDVRKSEWSVVPARTALAESVQERSQQTD
DEEFRMRRITSDMEDLGSRKALEGETDLIWYPAEVNTSIRPGWFYHPEEDDQVKSLEELV
HIYIGAVGGNATFLLNIPPMPNGLLHKNDVKRLEEFGNWKKKSFAHNLMSTAHVFSENED
PAHPASNLTEDTLEAWYQPESSELPVEITICLDDSYNLGYLVLKEAVCYSQRVEKYEVFV
KEGEIWNSIYTGTVIGYQKIIPVKGKKAREMKIVLHDFRVLPLLTFIGIYPENT
>tr|A0A1C6JPC0|A0A1C6JPC0_9CLOT Alpha-L-fucosidase OS=uncultured Clostridium sp. OX=59620 GN=SAMEA3545416_03226 PE=4 SV=1
MPTDQELIKIVPSCRQIAYQATEFYAFFHFGMNTYTNREWGDGTENPQIFNPTEFDADQW
VTAAQNAGMKGVILTCKHHDGFCLWPTRYTSHSVAASPWKNGRGDVVREVSEACRRHGLK
FGIYLSPWDRNQPCYGMGKEYDDYYLSQLTELLTRYGEIFSVWLDGACGEGPNGKKQVYD
WNRYYECVRKYQPDACICVCGPDIRWCGNEAGDVRKSEWSVVPARTALAESVQERSQQTD
DEEFRMRRITSDMEDLGSRKALEGETDLIWYPAEVNTSIRPGWFYHPEEDDQVKSLEELV
HIYIGAVGGNATFLLNIPPMPNGLLHKNDVKRLEEFGNWKKKSFAHNLMSTAHVFSENED
PAHPASNLTEDTLEAWYQPESSELPVEITICLDDSYNLGYLVLKEAVCYSQRVEKYEVFV
KEGEIWNSIYTGTVIGYQKIIPVKGKKAREMKIVLHDFRVLPLLTFIGIYPENT
>tr|A0A1Q6S749|A0A1Q6S749_9FIRM Alpha-fucosidase OS=Ruminococcus sp. CAG:108-related_41_35 OX=1897020 GN=BHW53_00660 PE=4 SV=1
MPTDQELIKIVPSSRQLAYQATEFYAFFHFGMNTYTNREWGDGTETPQIFNPTEFVADQW
VSAAQNAGMKGVILTCKHHDGFCLWPTRYTSHSVVSSPWKNGRGDVVWEVSEACRRYGMK
FGIYLSPWDRNKPCYGSGKEYDDYYLAQLTELLTGYGDIFSVWLDGACGEGPNGKKQIYD
WKRYYECVRKYQPDACICVCGPDIRWCGNEAGDVRKSEWSVVPARTALAESVQERSQQTD
DKEFRMRRITSDMEDLGSRRALEGETNLIWYPAEVNTSIRPGWFYHPEEDDQVKSLEELI
YIYIGAVGGNATFLLNIPPMPNGLLHENDVKRLEEFGSWKKKSFTHNLMSTAHIFSENED
PTHPVSDLTDDTSETWFQPESSELPVEITICLDGSYNLGYLVLKEAVCYSQRVEKFEIFV
KEGEIWNSIYTGTVIGYKKIISVKGQKAQKVKIVLHDFRVLPLLSFVGIYPESL
>tr|A0A416SJK6|A0A416SJK6_9FIRM Alpha-fucosidase OS=Ruminococcus sp. AF19-29 OX=2293158 GN=DWX46_05020 PE=4 SV=1
MPTDQELIKIVPSSRQLAYQATEFYAFFHFGMNTYTNREWGDGTETPQIFNPTEFVADQW
VSAAQNAGMKGVILTCKHHDGFCLWPTRYTSHSVVSSPWKNGRGDVVWEVSEACRRYGMK
FGIYLSPWDRNKPCYGSGKEYDDYYLAQLTELLTGYGDIFSVWLDGACGEGPNGKKQIYD
WKRYYECVRKYQPDACICVCGPDIRWCGNEAGDVRKSEWSVVPARTALAESVQERSQQTD
DKEFRMRRITSDMEDLGSRRALEGETNLIWYPAEVNTSIRPGWFYHPEEDDQVKSLEELI
YIYIGAVGGNATFLLNIPPMPNGLLHENDVKRLEEFGSWKKKSFTHNLMSTAHIFSENED
PTHPVSDLTDDTSETWFQPESSELPVEITICLDGSYNLGYLVLKEAVCYSQRVEKFEIFV
KEGEIWNSIYTGTVIGYKKIISVKGQKAQKVKIVLHDFRVLPLLSFVGIYPESL
>tr|A0A417AAB1|A0A417AAB1_9FIRM Alpha-fucosidase OS=Ruminococcus sp. AM46-18 OX=2293220 GN=DW958_08880 PE=4 SV=1
MPTDQELIKIVPSSRQLAYQATEFYAFFHFGMNTYTNREWGDGTETPQIFNPTEFVADQW
VSAAQNAGMKGVILTCKHHDGFCLWPTRYTSHSVVSSPWKNGRGDVVWEVSEACRRYGMK
FGIYLSPWDRNKPCYGSGKEYDDYYLAQLTELLTGYGDIFSVWLDGACGEGPNGKKQLYD
WKRYYECVRKYQPDACICVCGPDIRWCGNEAGDVRKSEWSVVPARTALAESVQERSQQTD
DKEFRMRRITSDMEDLGSRRALEGETNLIWYPAEVNTSIRPGWFYHPEEDDQVKSLEELI
YIYIGAVGGNATFLLNIPPMPNGLLHENDVKRLEEFGSWKKKSFTHNLMSTAHIFSENED
PTHPVSDLTDDTSETWFQPESSELPVEITICLDGSYNLGYLVLKEAVCYSQRVEKFEIFV
KEEEIWNSIYTGTVIGYKKIISVKGQKAQKVKIVLHDFRVLPLLSFVGIYPESL
>tr|A0A417ATN0|A0A417ATN0_9FIRM Alpha-fucosidase OS=Ruminococcus sp. AM45-2 OX=2293218 GN=DW953_15275 PE=4 SV=1
MPTDQELIKIVPSSRQLAYQATEFYAFFHFGMNTYTNREWGDGTETPQIFNPTEFVADQW
VSAAQNAGMKGVILTCKHHDGFCLWPTRYTSHSVVSSPWKNGRGDVVWEVSEACRRYGMK
FGIYLSPWDRNKPCYGSGKEYDDYYLAQLTELLTGYGDIFSVWLDGACGEGPNGKKQIYD
WKRYYECVRKYQPDACICVCGPDIRWCGNEAGDVRKSEWSVVPARTALAESVQERSQQTD
DKEFRMRRITSDMEDLGSRRALEGETNLIWYPAEVNTSIRPGWFYHPEEDDQVKSLEELI
YIYIGAVGGNATFLLNIPPMPNGLLHENDVKRLEEFGSWKKKSFTHNLMSTAHIFSENED
PTHPVSDLTDDTSETWFQPESSELPVEITICLDGSYNLGYLVLKEAVCYSQRVEKFEIFV
KEGEIWNSIYTGTVIGYKKIISVKGQKAQKVKIVLHDFRVLPLLSFVGIYPESL
>tr|A0A417D4P1|A0A417D4P1_9FIRM Alpha-fucosidase OS=Ruminococcus sp. AM42-11 OX=2292372 GN=DW904_03605 PE=4 SV=1
MPTDQELIKIVPSCRQIAYQATEFYAFFHFGMNTYTNREWGDGTENPQIFNPTEFDADQW
VTAAQNAGMKGVILTCKHHDGFCLWPTRYTRHSVAASPWKNGRGNVVREVSEACRRHGLK
FGIYLSPWDRNQPCYGSGKEYDDYYLAQLIELLTGYGDIFSVWLDGACGEGPNGKKQVYD
WNRYYECVRKYQPDACICVCGPDIRWCGNEAGDVRKSEWSVVPARTALAESVQERSQQTD
DEEFRMRRITSDMEDLGSRKALEGETDLIWYPAEVNTSIRPGWFYHPEEDDQVKSLEELV
HIYIGAVGGNATFLLNIPPMPNGLLHKNDVKRLEEFGSWKKKSFAHNLMSTAHVFSENED
PAHPASNLTKDTLEAWYQPESSELPVEITICLDDSYNLGYLVLKEAVCYSQRVEKYEVFV
KEGEIWNSIYTGTVIGYQKIIPVKGKKAREMKIVLHDFRVLPLLTFIGIYPENT
>tr|A0A417DCQ6|A0A417DCQ6_9FIRM Alpha-fucosidase OS=Ruminococcus sp. AM42-10AC OX=2293215 GN=DW903_01300 PE=4 SV=1
MPTDQELIKIVPSSRQLAYQATEFYAFFHFGMNTYTNREWGDGTETPQIFNPTEFVADQW
VSAAQNAGMKGVILTCKHHDGFCLWPTRYTSHSVVSSPWKNGRGDVVWEVSEACRRYGMK
FGIYLSPWDRNKPCYGSGKEYDDYYLAQLTELLTGYGDIFSVWLDGACGEGPNGKKQIYD
WKRYYECVRKYQPDACICVCGPDIRWCGNEAGDVRKSEWSVVPARTALAESVQERSQQTD
DKEFRMRRITSDMEDLGSRRALEGETNLIWYPAEVNTSIRPGWFYHPEEDDQVKSLEELI
YIYIGAVGGNATFLLNIPPMPNGLLHENDVKRLEEFGSWKKKSFTHNLMSTAHIFSENED
PTHPVSDLTDDTSETWFQPESSELPVEITICLDGSYNLGYLVLKEAVCYSQRVEKFEIFV
KEGEIWNSIYTGTVIGYKKIISVKGQKAQKVKIVLHDFRVLPLLSFVGIYPESL
>tr|A0A417MGT4|A0A417MGT4_9FIRM Alpha-fucosidase OS=Ruminococcus sp. TF11-2AC OX=2293241 GN=DXD14_05445 PE=4 SV=1
MPTDQELIKIVPSSRQLAYQATEFYAFFHFGMNTYTNREWGDGTETPQIFNPTEFVADQW
VSAAQNAGMKGVILTCKHHDGFCLWPTRYTSHSVVSSPWKNGRGDVVWEVSEACRRYGMK
FGIYLSPWDRNKPCYGSGKEYDDYYLAQLTELLTGYGDIFSVWLDGACGEGPNGKKQIYD
WKRYYECVRKYQPDACICVCGPDIRWCGNEAGDVRKSEWSVVPARTALAESVQERSQQTD
DKEFRMRRITSDMEDLGSRRALEGETNLIWYPAEVNTSIRPGWFYHPEEDDQVKSLEELI
YIYIGAVGGNATFLLNIPPMPNGLLHENDVKRLEEFGSWKKKSFTHNLMSTAHIFSENED
PTHPVSDLTDDTSETWFQPESSELPVEITICLDGSYNLGYLVLKEAVCYSQRVEKFEIFV
KEGEIWNSIYTGTVIGYKKIISVKGQKAQKVKIVLHDFRVLPLLSFVGIYPESL
>tr|A0A417SBN5|A0A417SBN5_9FIRM Alpha-fucosidase OS=Ruminococcus sp. OM05-7 OX=2293232 GN=DXB74_05910 PE=4 SV=1
MPTDQELIKIVPSSRQLAYQATEFYAFFHFGMNTYTNREWGDGTETPQIFNPTEFVADQW
VSAAQNAGMKGVILTCKHHDGFCLWPTRYTSHSVVSSPWKNGRGDVVWEVSEACRRYGMK
FGIYLSPWDRNKPCYGSGKEYDDYYLAQLTELLTGYGDIFSVWLDGACGEGPNGKKQIYD
WKRYYECVRKYQPDACICVCGPDIRWCGNEAGDVRKSEWSVVPARTALAESVQERSQQTD
DKEFRMRRITSDMEDLGSRRALEGETNLIWYPAEVNTSIRPGWFYHPEEDDQVKSLEELI
YIYIGAVGGNATFLLNIPPMPNGLLHENDVKRLEEFGSWKKKSFTHNLMSTAHIFSENED
PTHPVSDLTDDTSETWFQPESSELPVEITICLDGSYNLGYLVLKEAVCYSQRVEKFEIFV
KEGEIWNSIYTGTVIGYKKIISVKGQKAQKVKIVLHDFRVLPLLSFVGIYPESL
>tr|R7CEA9|R7CEA9_9FIRM Alpha-L-fucosidase OS=Ruminococcus sp. CAG:9 OX=1262967 GN=BN806_01268 PE=4 SV=1
MPTDQELIKIVPSSRQLAYQATEFYAFFHFGMNTYTNREWGDGTETPQIFNPTEFVADQW
VSAAQNAGMKGVILTCKHHDGFCLWPTRYTSHSVVSSPWKNGRGDVVWEVSEACRRYGMK
FGIYLSPWDRNKPCYGSGKEYDDYYLAQLTELLTGYGDIFSVWLDGACGEGPNGKKQIYD
WKRYYECVRKYQPDACICVCGPDIRWCGNEAGDVRKSEWSVVPARTALAESVQERSQQTD
DKEFRMRRITSDMEDLGSRRALEGETNLIWYPAEVNTSIRPGWFYHPEEDDQVKSLEELI
YIYIGAVGGNATFLLNIPPMPNGLLHENDVKRLEEFGSWKKKSFTHNLMSTAHIFSENED
PTHPVSDLTDDTSETWFQPESSELPVEITICLDGSYNLGYLVLKEAVCYSQRVEKFEIFV
KEGEKWNSIYTGTVIGYKKIISVKGQKAQKVKIVLHDFRVLPLLSFVGIYPESL
>tr|A0A218W9A4|A0A218W9A4_PUNGR Uncharacterized protein OS=Punica granatum OX=22663 GN=CDL15_Pgr025107 PE=4 SV=1
MAIKEKQVNAHDAPAITFGCWKSMFRSFLWLLLAPPLAAIPSPSRAQSRTPPPLPVLPIP
TAQQLAWQLGEMAMFLHFGPNTFTNSEWGTGDAPPSFFNPTQMDAAQWVRVAKESGFSRV
ILTAKHHDGFCLWPSDLTDYSVRSSSWRNGAGDVVAELAAAAREAGIGLGLYLSPWDRHE
ECYGKTMEYNEFYLGQMRELLTRYGEIKEVWLDGAKGEGEKDMEYFFDSWFSLVRQVQPG
AVIFSDAGPDTRWVGDEAGIASPTCWSLFNISDAAIGGTDPQYSRRGDPFGHDWVAPECD
VSIRGGWFWHESEAPKSALTLLDIYYKSVGRNCLLLLNVPPNVLGLISDEDIKVLREFHE
LRSSIFSHNLAKTALLNASSTRGGIYNSQYSLQNVLVEGIFSYWAPRENWPYWVLELQFE
KPVSFNVLKVQEPIHMGQRVIEFHVKVLSKEGQWRRVINGTTIGYQRLLRFPTLEAKRLR
FEIEKSRGDPLISYLGVYLDTFLSLSDLSRNNSSQLNMNGTLVIEQMRSKRSRSASVSYK
>tr|A0A2I0J7S6|A0A2I0J7S6_PUNGR Uncharacterized protein OS=Punica granatum OX=22663 GN=CRG98_027592 PE=4 SV=1
MAMFLHFGPNTFTNSEWGTGDAPPSFFNPTQMDAAQWVRVAKESGFSRVILTAKHHDGFC
LWPSDLTDYSVRSSSWRNGAGDVVAELAAAAREAGIGLGLYLSPWDRHEECYGKTMEYNE
FYLGQMRELLTRYGEIKEVWLDGAKGEGEKDMEYFFDSWFSLVRQVQPGAVIFSDAGPDT
RWVGDEAGIASPTCWSLFNISDAAIGGTDPQYSRRGDPFGHDWVAPECDVSIRGGWFWHE
SEAPKSALTLLDIYYKSVGRNCLLLLNVPPNVLGLISDEDIKVLREFHELRSSIFSHNLA
KTALLNASSTRGGIYNSQYSLQNVLVEGIFSYWAPRENWPYWVLELQFEKPVSFNVLKVQ
EPIHMGQRVIEFHVKVLSKEGQWRRVINGTTIGYQRLLRFPTLEAKRLRFEIEKSRGDPL
ISYLGVYLDTFLSLSDLSRTQTTTI
>tr|C6W2F9|C6W2F9_DYAFD Coagulation factor 5/8 type domain protein OS=Dyadobacter fermentans (strain ATCC 700827 / DSM 18053 / NS114) OX=471854 GN=Dfer_2596 PE=4 SV=1
MIKQITGLLCLTASIAFAQTPPKPYGALPAPRQLAWHETEVYGIMHFTPTTFENKEWGYG
DADPKTFNPTDFNADQIVSAAKAGGLRGIVLVAKHHDGFCLWPTKTTDYNITKSPFRGGK
GDLVREVADAARKQGLKFGVYCSPWDRNNAKYGTPEYIKIYREQLRELYTNYGDLFMSWH
DGANGGDGYYGGAREKRSIDNTTYYQWDSTWTNYTRKLQPNASIFSDIGWDVRWAGNEDG
SVNPTSWATLTPKPSEGQNVAVPGQANATENPGGTRGGKFWIPAECDVPLRKGWFYHENE
KPKTPEKLFDLYLKSVGRGAALDLGLAPDTRGQLHNDDVAVLKTFGDRVKNTFATNLIAR
GSSKAVNVRGYNSIYSAKNLLDGKPDTYWATDDDFKTPEVVIELSQPIVFDVISLQEYIK
LGQRIEEFAVDAWIGNEWKEIYKGTSVGAKRIARLDVPITSNKLRLRVTKSPVSIAISEF
GVYKDAE
>tr|A0A1G6ZF52|A0A1G6ZF52_9BACT Alpha-L-fucosidase OS=Dyadobacter soli OX=659014 GN=SAMN04487996_103102 PE=4 SV=1
MIKQITGLLCLTASIAFAQTPPKPYGALPALRQIAWHETEVYGIMHFTPTTFENKEWGYG
DADPKTFNPSDFNADQIVQAAKAGGLRGIVLVAKHHDGFCLWPTKTTDYNITKSPFREGK
GDLVREVADAARKHGLKFGVYCSPWDRNNAKYGTPEYIKIYREQLRELYTNYGDLFMSWH
DGANGGDGYYGGAREKRSIDNTTYYQWDSTWTNYTRKLQPNANIFSDIGWDVRWAGNEDG
SVNPTSWATLTPKPSEGQNVAVPGQANATENPGGTRGGKFWIPAECDVPLRKGWFYHANE
KPKTPEKLFDLYLKSVGRGAALDLGLAPDTRGQLHNDDVVALKTFGDHVKNTFATNLLGR
ATSKAVNVRGYNSIYSAKNLLDGKPDTYWATDDDFKTPEVVIELTQPIVFDVISLQEYIK
LGQRIEEFAVDAWIGNEWKEIHKGTSVGAKRLAKLDVPITSNKVRLRITKSPVSIAISEF
GVYKDTE
>tr|A0A1H6W2J4|A0A1H6W2J4_9BACT Alpha-L-fucosidase OS=Dyadobacter sp. SG02 OX=1855291 GN=SAMN05216327_106128 PE=4 SV=1
MIKKISGLLCLTASIAFAQTPPKPYGALPAPRQIAWHETEVYGIMHFTPTTFENKEWGYG
DADPKTFNPSDFNADQIVQAAKAGGLRGIVLVAKHHDGFCLWPTKTTDYNITKSPFREGK
GDLVREVADAARKHGLKFGVYCSPWDRNNAKYGTPEYIKIYREQLRELYTNYGDLFMSWH
DGANGGDGYYGGAREKRSIDNTTYYQWDSTWTNYTRKLQPNANIFSDIGWDVRWAGNEDG
SVNPTSWATLTPKPSEGQNVAVPGQANATENPGGTRGGKFWIPAECDVPLRKGWFYHTNE
KPKTPEKLFDLYLKSVGRGAALDLGLAPDTRGQLHNDDVAALKTFGDHVKNTFATNLVGR
ASSKAVNVRGYNSIYSAKNLLDGKTDTYWATDDDFKTPEVVIELSQPIVFDIISLQEYIK
LGQRIEEFAVDAWIGNEWKEVYKGTSVGAKRIAKLDVPITSNKVRLRITKSPVSIAISEF
GVYKDTE
>tr|A0A1Q3PM82|A0A1Q3PM82_9BACT Alpha-L-fucosidase OS=Dyadobacter sp. 50-39 OX=1895756 GN=BGO21_12255 PE=4 SV=1
MIKKITGLLCLTASIAFAQTPPKPYGALPAPRQLAWHETEVYGIMHFTPTTFENKEWGYG
DADPKTFNPSDFNADQIVLAAKAGGLRGIVLVAKHHDGFCLWPTKTTDYNITKSPFRSGK
GDLVREVADAARKHGLKFGVYCSPWDRNNAQYGTPEYLKIYREQLRELYTNYGDLFMSWH
DGANGGDGYYGGAREKRSIDNTTYYQWDSTWTNYTRKLQPNANIFSDIGWDVRWAGNEDG
SVNPTSWATLTPKPSEGQNVAVPGQANATENPGGTRGGKFWIPAECDVPLRKGWFYHANE
KPKTPEKLFDLYLKSVGRGAALDLGLAPDTRGQLHSDDVAALKTFGDRVKNTFATNLISR
ASSKAVNVRGYNSIYSAKNLLDGKPETYWATDDDFKTPEVVIEMTQPVVFDVISLQEYIK
LGQRIEEFAVDAWIGNEWKEIYKGTSVGAKRLARLDVPITSNKVRLRITKSPVSIAISEF
GVYKDTE
>tr|A0A2P8FWM7|A0A2P8FWM7_9BACT Alpha-L-fucosidase OS=Dyadobacter jiangsuensis OX=1591085 GN=CLV60_110105 PE=4 SV=1
MIKKISGLLCLTASIAFAQTPPKPYGALPAARQIAWHETEVYGIMHFTPTTFENKEWGYG
DADPKTFNPSDFNADQIVQAAKAGGLRGIVLVAKHHDGFCLWPTKTTDYNITKSPFRDGK
GDLVREVADAARKHGLKFGVYCSPWDRNNAKYGTPEYIKIYREQLRELYTNYGDLFMSWH
DGANGGDGYYGGAREKRSIDNTTYYQWDSTWTNYTRKLQPNASIFSDIGWDVRWAGNEDG
SVNPTSWATLTPKPSEGQNVAVPGQANATENPGGTRGGKFWIPAECDVPLRKGWFYHANE
KPKTPEKLFDLYLKSVGRGAALDLGLAPDTRGQLHNDDVVALKTFGDHVKNTFATNLIGR
ASSKAVNVRGYNSIYSAKNLLDGKPDTYWATDDDFKTPEVVIEMNQPIVFDIISLQEYIK
LGQRIEEFAVDAWIGNEWKEVYKGTSVGAKRLAKLDVPITSNKVRLRITKSPASIAISEF
GVYKDTE
>tr|A0A220U256|A0A220U256_9BACI Uncharacterized protein OS=Virgibacillus phasianinus OX=2017483 GN=CFK37_08665 PE=4 SV=1
MSTGEIKPTAKQLEYQAWEFGLFIHFGLRTFYEGYVDFDKRPMYPARFNPSALDCEQWIL
TAKAAGMKYAVLTAKHHDGFSNWPSRFTDFSVANSAWKDGKGDVVQEFTAACHKHGIKPG
LYYSPYDGSADFYHDKDGKAYDDYFINQITELLTNYGDVDILWFDGAGSENHEYDWQRIV
DTVRSLQPNILLFNMADPDFRWIGNEDGIAPTPCWNEVDTDDLSDYHGNKGRLWLPAECD
VQMRDNWFYSENDEHTVKSLEQLMGIYYYSIGHGANLLLNIGPNRQGLLPEKDRRRLVEF
GDKVRERFASKVATIDQFEQRERTWMYQAKEPHMLNHVVIQEDLRNGENVESFKVAIISE
KSRQKVTIYEGRSIGNKAIIQVPAIKVRGVEVEVTKSTREPRLKGISVY
>tr|A0A031HZP6|A0A031HZP6_9SPHN F5/8 type C domain protein OS=Sphingomonas sp. RIT328 OX=1470591 GN=BW41_01717 PE=4 SV=1
MPILSRRTLMASGLASAGISLAQASPPGPAAPAPYGATPSPRQLAWHRREQYAFVHFSIN
TFTNREWGYGDESPALFDPTDFSADQIVDAAKAGGLRGLILTAKHHDGFCLWPTRLTEHC
VLNSPFRGGKGDVVREFERACRRAGLAFGLYLSPWDRNHADYGRPAYIDYYRRQIVELCT
RYGPLFEFWFDGANGGDGYYGGARETRKIDAEAYYNWPEIVALVHRHQPMACTFEPLGSD
ARWVGNEDGVAGDPCWPTMPNHKPSQAEGNAGLRDGPLWWPAETNTSIRPGWFYHEDEDS
KVKDPQRLVRLYDESVARGTNLILNLPPDRRGRLADSDCAVLRSFGDAQRATFANDLARG
AVAQADHVRGSAYAAARVLDGDPSSYWSTPDAVHTPSLVLELPPGRAFDLIRLREFLPLG
VRVTRFAIDLDHGSGWGEVAAGACIAAQRIVRLPAPVQARRLRLRITEAPACPAISEIAL
FRQVPPLPVARPAAPDQNAVSPAEWTLVSSSAPDVQALFDADAGTVWRMPVSGGPAEAAV
TLRFHTAQRLAGFILTPSRAVMDDAAPPKRYTVEASPDGSRWHPLADGEFSNIVNALSPQ
HIAFASGAAVTWLRFVFHQTARPAGAIAIADLSILRR
>tr|A0A031IA02|A0A031IA02_9SPHN F5/8 type C domain protein OS=Sphingomonas sp. RIT328 OX=1470591 GN=BW41_00062 PE=4 SV=1
MTDLSRRTILATGLAATAMPALAAPAFTAGAPKPYGATPSPRQLAWHRRERYAFVHFSIN
TFTNREWGYGDESPALFNPTDFAPDQIVAAAKAGGMRGIILTAKHHDGFCLWPTQLTEHC
IRNSPYKNGKGDIVREMEQATRRAGLSFGLYLSPWDRNHPEYGRPAYIDYYRKQVVELCT
RYGELFEFWFDGANGGDGYYGGARETRKIDAPKYYNWPSIIALVHQHQPMACTFDPLGAD
IRWVGNEDGVAGDPCWPTMPDHPYVQSEGNSGVRGGVLWWPAETDVSIRPGWFYHPDEDG
AVKTPERLIRLHDESIGRGTNLNLNLPPDRRGRIPDHDVAVLKSFGAALEASFARDLAQG
AVASASATRGAAFAPAKVLDGDRDSYWSTPDGITTPTLTLDLPPGRRFDLIRLREFLPLG
VRVTRFAVEAEVGGRWQRLAEKSCIGAQRIIRLPRPIDARRLRLVILDAPACPAIREVAL
FHSVAPVAVAAPRVADATALSPRGWKVVTASAPGAEALLDGNGDTIWSQPAPAATPASVT
LDLGRAQTVAGFSLTPWRHPDTASAPPRGYHAETSLDGTHWTDAGEGEFQNIAYALATQR
IPFAAPRELRFLRLSFPATAVPAAKLAIADVGAFSG
>tr|A0A059AAD8|A0A059AAD8_EUCGR Uncharacterized protein OS=Eucalyptus grandis OX=71139 GN=EUGRSUZ_J00379 PE=4 SV=1
MTSSDCLVRSTDSPQKPPPFPVLPIPTSRQLEWQSDFMALFLHFGPNTFTDSEWGDGRAD
PSVFHPTRLDAAQWVGVAKQAGFSRVILTAKHHDGFCLWPSEYTDYSVRSSPWRGGRGDV
VAELSNAARDAGIGLGLYLSPWDRHEPSYGRTVEYNEFFMGQMTELLTRYGEIKEVWLDG
AKGEGEKDMDYYFESWFSLIRQLQPRAVIFSDAGPDTRWIGNEAGVAGSTCWSTFNRSSA
KIGGTDPRYSRSGDPVGHDWVPAECDVSIRPGWFWHASQVPKSARTLLDIYYKSVGRNCL
LLLNVPPNSSGLISEEDVQVLQEFNELRRSIFDENLAKGALLSASSTRGGMMNNSHFSAE
NVLKEGIYSYWAPEENWSDWTLYLRFQEKVKFNVLQVQEPIQLGQRVIEFHLETLNDGGE
WRQVINGTTVGYQRLLQFPMLETQELRNFYEYFSNTWKLDVMKTARNNLSATL
>tr|A0A059AAJ4|A0A059AAJ4_EUCGR Uncharacterized protein OS=Eucalyptus grandis OX=71139 GN=EUGRSUZ_J00367 PE=4 SV=1
MKKKTMTSKYGKPISPNAFLSIFALSICLLSSSSVGDCLVRSADSPQKPPPLPILPIPTS
RQLEWQSASMALFLHFGPNTFTDSEWGSGRADPSVFHPTRLDAAQWVGVAKQAGFSRVIL
TAKHHDGFCLWPSEYTDYSVRSSPWRGGRGDVVAELSSAARDAGIGLGLYLSPWDRHEPS
YGRTVEYNEFYVGQMTELLTRYGEIKEVWLDGAKGEGEKDMDYYFESWFSLIRQLQPRAV
IFSDAGPDTRWIGDEAGVAGSTCWSAFNRSNAKIGGTDPQYSRSGDPVGQDWVPAECDVS
IRPGWFWHASEVPKSARTLLDIYYKSVGRNCLLLLNVPPNSLGLISKEDVQVLQEFNELR
RSIFNENLAKSALLSASSTRGGMMNNSRFSAENVLKEGIYSYWAPEENRSDWTLYLRFQE
KVKFNVLQVQEPIQLGQRVIQFHLKTLNDRGEWRQVINGTTVGYQRLLQFPMLETQELRF
VIDKSRADPLISYLGLYVDTFSILTETSTNTSQTHVNGSWVIMKTARNNLSATL
>tr|A0A059ABD0|A0A059ABD0_EUCGR Uncharacterized protein OS=Eucalyptus grandis OX=71139 GN=EUGRSUZ_J00379 PE=4 SV=1
MTSSDCLVRSTDSPQKPPPFPVLPIPTSRQLEWQSDFMALFLHFGPNTFTDSEWGDGRAD
PSVFHPTRLDAAQWVGVAKQAGFSRVILTAKHHDGFCLWPSEYTDYSVRSSPWRGGRGDV
VAELSNAARDAGIGLGLYLSPWDRHEPSYGRTVEYNEFFMGQMTELLTRYGEIKEVWLDG
AKGEGEKDMDYYFESWFSLIRQLQPRAVIFSDAGPDTRWIGNEAGVAGSTCWSTFNRSSA
KIGGTDPRYSRSGDPVGHDWVPAECDVSIRPGWFWHASQVPKSARTLLDIYYKSVGRNCL
LLLNVPPNSSGLISEEDVQVLQEFNELRRSIFDENLAKGALLSASSTRGGMMNNSHFSAE
NVLKEGIYSYWAPEENWSDWTLYLRFQEKVKFNVLQVQEPIQLGQRVIEFHLETLNDGGE
WRQVINGTTVGYQRLLQFPMLETQELRFVIDKSRADPLISYLGLYVDTFSILTETSTSTS
QTHGSWML
>tr|A0A221MI15|A0A221MI15_9BACI Uncharacterized protein OS=Virgibacillus necropolis OX=163877 GN=CFK40_03875 PE=4 SV=1
MQTKPTLKQLEYQKWEFGLFVHFGLRTFYEGYVDFDERQMDPFKFNPTSLDCEQWIRTAK
EAGMKYAVLTAKHHDGFSNWPSSFTDFSVAHSPWKNGKGDVVQEFTSACRKHGVKPGLYY
SPYDGSANFYNQKDRKAYDDYFINQITELLANYGDIEILWFDAAGSENHEYDWKRIIDTV
RSLQPNILIFNMADPDFRWVGNEDGIAPIPCWNEVNTVKSDRLWLPAECDVQMRENWFFS
ESDEHTVKSLEQLMGIYYYSVGRGANLLLNIGPNRHGLFPEKDQQRLLEFGGEIRRRFDN
PVATIDRFEQQEGKWIYHTEQPHLLDHVVIQEDLRKGESVENFKINIISEKSRQPITIYQ
GRNIGNKAIIRVPAIEVRGVELEVTESVGEPIIEELAIYYVGDDGNY
>tr|A0A059DK56|A0A059DK56_EUCGR Uncharacterized protein (Fragment) OS=Eucalyptus grandis OX=71139 GN=EUGRSUZ_A02862 PE=4 SV=1
LKWQQREIIMFLHFGVNTFTGYERGTGHEDPAIFNPVGLDTNQWVSAAVDAGISLMILTA
KHHDGFCLWPSKYTDHSVERSRWKDGKGDVVWEFVDAAKARGVDVGLYLSPWDRHEPRYG
HILEYNEYYLAQLQELLTNYGSLREIWFDGFKNSTLNMTYYFTEWFSMVKELQSSINIFS
DAGPDVRWVGNEDGTAGTTCWATINRTSLSIGNASIEGYLNVGDPRGTHYLPAECDVTIR
DGWFWHKSESPKKLSKLLQIYYNSVGRNCVLLLNVPPNTTGLLPETDVHTLKELRTALDT
IFSVNLAEKCSVKASSQRGGEDGGFGPENVLDSDHLWTYWAPVDEDDAQDHWIEMRGADG
GLRFNVVRIQEAVGLGQRIKRHEIYVDGKKVAQGTTVGHKRLHRLKGGVVQ
>tr|C7M3S8|C7M3S8_CAPOD Alpha-L-fucosidase OS=Capnocytophaga ochracea (strain ATCC 27872 / DSM 7271 / JCM 12966 / NCTC 12371 / VPI 2845) OX=521097 GN=Coch_2160 PE=4 SV=1
MKKLILLVTALFMVACKSIEAPKSVGAIPSARQLPWHEMEYYAFIHFNMNTFTDMEWGTG
GEDPVLFNPTELDVNQWVKVIKDAGMKGVIITAKHHDGFCLWPSKYTEHSVKNSPWKNGK
GDVIKELSEACHKAGLKFGVYLSPWDRNHAEYGREAYVTYFHNQLRELLTNYGEIFEVWF
DGANGGSGYYGGANETRTIDAHTYYQWDKTFAIVRELQPNATIFGDEGPDIRWIGNEKGF
GTRTNWNPFTSNPSLQGKDHLHHLGEGDENGVNWIPAEADVSIRPGWYYHAREDHQVRPL
EKMVDIYYASVGRGYNLLLNLPVDRRGLVHENDIKRLMELKKVIEADFARNLVTDASVTA
SNIRKNNKQFKAEKTTDSDKNTYWTTDEGVTEASIELNFTKPTTFNRFMAQEYIPLGQRV
KKFKLEYQKDGKWETIDEQTTIGYKRLLRFPSVTATKVRFTVLEAKGSPLISNIGLYNAP
VLLVTPQLSRDKNGLVTLTPADTETEIYYTLDGSQPTEQSLRYTAPFPVTQPTSLKFVAY
DRKQQLYSEVASYALDIPKAKWKVLSSASSDIQKVIDEKPNTWFAQEKGNTPTAITIDLG
ELLNLKGFTYLPSQDRWAEGTISHYIFEVSADNVHWKKLSEGEFGNIKNNPIEQRITFPA
EKARYIKLTATKTVDDTNRVSYAEIGIITQ
>tr|A0A0M4GJL2|A0A0M4GJL2_9FLAO Alpha-L-fucosidase OS=Capnocytophaga sp. oral taxon 323 OX=1705617 GN=AM608_03305 PE=4 SV=1
MKKLVLLATTLCMVACKSIEAPKSVGAIPSARQLPWHEMEYYAFIHFNMNTFTDMEWGTG
GEDPVLFNPTELDVNQWVKVIKDAGMKGVIITAKHHDGFCLWPSKYTEHSVKNSPWKNGK
GDVIKELSEACHKAGLKFGVYLSPWDRNHAEYGREAYVTYFHNQLRELLTNYGEIFEVWF
DGANGGSGYYGGANETRTIDAHTYYQWDKTFAIVRELQPNATIFGDEGPDIRWIGNEKGF
GTPTNWNPFTSNPSLQGKDHLHHLGEGDENGVNWIPAEADVSIRPGWYYHAREDHQVRPL
EKMVDIYYASVGRGYNLLLNLPVDRRGLVHENDIKRLMELKKVIEADFAHNLVTEASVTA
SNIRKNNKQFKAEKTTDSDKNTYWTTDEGVTEASIELNFTKPTTFNRFMAQEYIPLGQRV
KKFKLEYQKDGKWKTIDEQTTIGYKRLLRFPSVTATKVRFTVLEAKGSPLISNIGLYNAP
VLLVTPQLSRDKNGQVTLTPADTETEIYYTLDGSQPTEQSLRYTTPFPVTQPTSLKFVAY
DGKQQLYSEVASYALDTPKAKWKVLSSASSDIQKVIDEKPNTWFAQEKGNTPTAITIDLG
ELLNLKGFTYLPSQDRWAEGTISHYIFEVSTDNVHWKKLSEGEFGNIKNNPIEQRITFPA
EKARYIKLTATKTVDDTNRVSYAEIGIITQ
>tr|A0A2S0LER4|A0A2S0LER4_9FLAO Alpha-L-fucosidase OS=Capnocytophaga sp. oral taxon 864 OX=1316593 GN=C3V44_01160 PE=4 SV=1
MKKLVLLATALCMVACKSIEAPKSVGAIPSARQLPWHEMEYYAFIHFNMNTFTDMEWGTG
GEDPVLFNPTELDVNQWVKVIKDAGMKGVIITAKHHDGFCLWPSEYTEHSVKNSPWKNGK
GDVIKELSEACHKAGLKFGVYLSPWDRNHAEYGREAYVTYFHNQLRELLTNYGEIFEVWF
DGANGGSGYYGGANETRTIDAHTYYQWDKTFAIVRELQPNATIFGDEGPDIRWIGNEKGF
GTPTNWNPFTSNPSLQGKDHLHHLGEGDENGVNWIPAEADVSIRPGWYYHAREDHQVRPL
EKMVNIYYASVGRGYNLLLNLPVDRRGLVHENDIKRLMELKKVIEADFARNLVTEASVTA
SNIRKNNKQFKPEKTTDSDKNTYWTTDEGVTEASIELNFTKPTTFNRFMAQEYIPLGQRV
KKFKLEYQKDGKWETIDEQTTIGYKRLLRFPSVTATKVRFTVLEAKGSPLISNIGLYNAP
VLLVTPQLSRDKNGQVTLTPADTETEIYYTLDGSQPTKQSLRYTTPFPVTQPTSLKFVAY
DGKQQLYSEVASYALDIPKAKWKVLSSASSDIQKVIDEKPNTWFAQEKGNTPTAITIDLG
ELLNLKGFTYLPSQDRWVEGTISHYIFEVSADNVHWKKLSEGEFGNIKNNPIEQRITFPV
EKARYIKLTATKTVDDTNRVSYAEIGIITQ
>tr|A0A2X2R7R9|A0A2X2R7R9_CAPOC Alpha-L-fucosidase OS=Capnocytophaga ochracea OX=1018 GN=NCTC11546_00368 PE=4 SV=1
MKKLVLLATALCMVACKSIEAPKPVGAIPSARQLPWHEMEYYAFIHFNMNTFTDMEWGTG
GEDPVLFNPTELDVNQWVKVIKDAGMKGVIITAKHHDGFCLWPSKYTEHSVKNSPWKNGK
GDVIKELSEACHKAGLKFGVYLSPWDRNHAEYGREAYVTYFHNQLRELLTNYGEIFEVWF
DGANGGSGYYGGANETRTIDAHTYYQWDKTFAIVRELQPNATIFGDEGPDIRWIGNEKGF
GTPTNWNPFTSNPSLQGKDRLHHLGEGDENGVNWIPAEADVSIRPGWYYHAREDHQVRPL
EKMVDIYYASVGRGYNLLLNLPVDRRGLVHENDIKRLMELKKVIEADFAHNLVTDASVTA
SNIRKNNKQFNPEKTTDSDKNTYWTTDEGVTEASIELNFTKPTTFNRFMAQEYIPLGQRV
KKFKLEYQKDGEWETIDEQTTIGYKRLLRFPSVTATKVRFTVLEAKGSPLISNIGLYNAP
VLLVTPQLSRDKNGQVTLTPADTETEIYYTLDGSQPTKQSLRYTTPFPVTQPTSLKFVAY
DRKQQLYSEVAPYALDIPKAKWKVLSSASSDIQKVIDEKPNTWFAQEKGNTPTAITIDLG
ELLNLKGFTYLPSQDRWAEGTISHYIFEVSTDNVHWKKLSEGEFGNIKNNPIEQRITFPA
EKARYIKLTATKTVDDTNRVSYAEIGIITQ
>tr|A0A2X2UWA9|A0A2X2UWA9_CAPOC Alpha-L-fucosidase OS=Capnocytophaga ochracea OX=1018 GN=NCTC11545_01075 PE=4 SV=1
MKKLVLLATALCMVACKSIEAPKSVGAIPSARQLPWHEMEYYAFIHFNMNTFTDMEWGTG
GEDPVLFNPTELDVNQWVKVIKDAGMKGVIITAKHHDGFCLWPSKYTEHSVKNSPWKNGK
GDVIKELSEACHKAGLKFGVYLSPWDRNHAEYGREAYVTYFHNQLRELLTNYGEIFEVWF
DGANGGSGYYGGANETRTIDAHTYYQWDKTFAIVRELQPNATIFGDEGPDIRWIGNEKGF
GTPTNWNPFTSNPSLQGKDRLHHLGEGDENGVNWIPAEADVSIRLGWYYHAREDHQVRPL
EKMVDIYYASVGRGYNLLLNLPVDRRGLVHENDIKRLMELKKVIEADFAHNLVTDASITA
SNIRENNKQFKPEKTTDSDRNTYWTTDEGVTEASIELNFTKPTTFNRFMAQEYIPLGQRV
KKFKLEYQKDGKWETIDEQTTIGYKRLLRFSSVTATKVRFTVLEAKGSPLISNIGLYNAP
VLLVTPQLSRDKNGQVTLTPADTETEIYYTLDGSQPTEQSLRYTASFSVTQPTSLKFVAY
DRKQQLYSEVASYALDIPKIKWKVLSSASSDIQKVIDEKPNTWFAQEKGNTPTAITIDLG
ELLNLKGFTYLPSQDRWVEGTISHYIFEVSADNVHWKKLSEGEFGNIKNNPIEQRITFPA
EKARYIKLTATKTVDDTNRVSYAEIGIITQ
>tr|A0A3P6KN47|A0A3P6KN47_CAMLA Alpha-L-fucosidase OS=Campylobacter lari OX=201 GN=NCTC11458_00213 PE=4 SV=1
MKKLVLLATALCMVACKSIEAPKSVGAILSARQLPWHEMEYYAFIHFNMNTFTDMEWGTG
GEDPVLFNPTELDVNQWVKVIKDAGMKGVIITAKHHDGFCLWPSKYTEHSVKNSPWKNGK
GDVIKELSEACHKAGLKFGVYLSPWDRNHAEYGREAYVTYFHNQLRELLTNYGEIFEVWF
DGANGGSGYYGGANETRTIDAHTYYQWDKTFAIVRELQPNATIFGDEGPDIRWIGNEKGF
GTPTNWNPFTSNPSLQGKDRLHHLSEGDENGVNWIPAEADVSIRPGWYYHAREDHQVRPL
EKMVDIYYASVGRGYNLLLNLPVDRRGLVHENDIKRLMELKKVIEADFAHNLVTDASVTA
SNIRKNNKQFNPEKTTDSDKNTYWTTDEGVTEASIELNFTKPTTFNRFMAQEYIPLGQRV
KKFKLEYQKDGKWETIDEQTTIGYKRLLRFPSVTATKVRFTVLEAKGSPLISNIGLYNAP
VLLVTPQLSRDKNGQVTLTPADTETEIYYTLDGSQPTKQSLRYTTPFPVTQPTSLKFVAY
DGKQQLYSEVASYALDIPKAKWKVLSSASSDIQKVIDEKPNTWFAQEKGNTPTAITIDLG
ELLNLKGFTYLPSQDRWAEGTISHYIFEVSTDNVHWKKLSEGEFGNIKNNPIEQRITFPA
EKARYIKLTATQTVDDTNKVSYAEIGIITQ
[truncated: 69,040 more rows]
